# Supplementary material
Source: PubMed Central journal article supplement (PMC4210285)
Supplement: pnas.1414908111.sapp.pdf [file pnas.1414908111.sapp.pdf]

Supporting Information for

**Role of pendant proton relays and proton-coupled electron transfer on the hydrogen evolution reaction by nickel hangman porphyrins**

D. Kwabena Bediako,<sup>a</sup> Brian H. Solis,<sup>b</sup> Dilek K. Dogutan,<sup>a</sup> Manolis M. Roubelakis,<sup>a</sup> Andrew G. Maher,<sup>a</sup> Chang Hoon Lee,<sup>a</sup> Matthew B. Chambers,<sup>a</sup> Sharon Hammes-Schiffer,<sup>b,\*</sup> and Daniel G. Nocera<sup>a,\*</sup>

<sup>a</sup> *Department of Chemistry and Chemical Biology, 12 Oxford Street, Harvard University, Cambridge, Massachusetts 02138-2902.* <sup>b</sup> *Department of Chemistry, University of Illinois at Urbana-Champaign, Urbana, Illinois 61801.*

## Table of Contents

|                                                                                              | <i>Page</i> |
|----------------------------------------------------------------------------------------------|-------------|
| General Experimental Details                                                                 | S3          |
| X-Ray Crystallographic Details                                                               | S4–S5       |
| Synthetic Details                                                                            | S5–S7       |
| Spectroelectrochemistry                                                                      | S7          |
| Computational Details                                                                        | S7–S9       |
| CV Simulation                                                                                | S9          |
| <b>Figure S1.</b> X-ray Crystal Structure of <b>2-Zn</b>                                     | S10         |
| <b>Figures S2–S4.</b> $^1\text{H}$ NMR Spectra                                               | S11–S23     |
| <b>Figures S5–S7.</b> Mass Spectrometry Data                                                 | S24–S30     |
| <b>Figures S8–S10.</b> UV-Vis Absorption Spectra                                             | S31–S33     |
| <b>Figures S11–S18.</b> Cyclic Voltammetry Data and Trumpet Plots                            | S34–S41     |
| <b>Figures S19.</b> Spectroelectrochemical Data                                              | S42–S44     |
| <b>Figure S20.</b> Computed Spin Densities on $[\mathbf{3-Ni}]^-$ and $[\mathbf{3-Ni}]^{2-}$ | S45         |
| <b>Figure S21–S23.</b> <b>1-Ni</b> CV Data, ETPT- and CPET-Simulation traces                 | S46–S48     |
| <b>Figure S24.</b> Isotope effect titration                                                  | 49          |
| <b>Tables S1–S2.</b> <b>3-Ni</b> Computational Data                                          | S50–S51     |
| <b>Tables S3–S4.</b> CV Simulation Parameters for ETPT Pathway                               | S52–S53     |
| <b>Table S5.</b> CV Simulation Parameters for CPET Pathway                                   | S54         |
| <b>Table S6.</b> <b>1-Ni</b> and Computational Data                                          | S55         |
| <b>Table S7.</b> Coordinates and Energies for Optimized Complexes (B3P86)                    | S56–S85     |

## General Experimental Details

$^1\text{H}$  NMR spectra (500 MHz) were recorded on samples in  $\text{CDCl}_3$  at room temperature unless noted otherwise. Silica gel (60  $\mu\text{m}$  average particle size) was used for column chromatography. 4-Formyl-5-bromo-2,7-di-tert-butyl-9,9-dimethylxanthene,<sup>1</sup> 5-pentafluorophenyldipyrrromethane,<sup>2</sup> were prepared as described in the literature. THF (anhydrous), methanol (anhydrous),  $\text{CH}_2\text{Cl}_2$  (anhydrous), benzoic acid ( $\geq 99.5\%$ ), and tetrabutylammonium hexafluoro-phosphate ( $\text{TBAPF}_6$ ,  $\geq 99.0\%$ ), and all other chemicals were used as received. LD-MS data was measured on porphyrins in the absence of matrix.

The microwave-assisted reactions were performed inside the cavity of a CEM Discover microwave synthesis system equipped with infrared, pressure and temperature sensors for monitoring the synthesis. The reaction vessels were 10 mL crimp-sealed thick-wall glass tubes. The contents of each vessel were stirred with a magnetic stirrer.

UV-vis spectra were recorded at room temperature in quartz cuvettes in  $\text{CH}_2\text{Cl}_2$  on a Varian Cary 5000 UV-vis-NIR spectrophotometer. UV-vis spectroelectrochemical measurements were made using a quartz thin layer cell (0.5 mm path length) at room temperature in a  $\text{N}_2$ -filled glovebox with an Ocean Optics USB4000 spectrophotometer and DT-Mini-2GS UV-vis-NIR light source.

Electrochemical measurements were performed on a CH Instruments (Austin, Texas) 760D Electrochemical Workstation using CHI Version 10.03 software. Cyclic voltammetry (CV) experiments were conducted in a nitrogen-filled glovebox at 295 K using a CH Instruments glassy carbon button working electrode (area = 0.071  $\text{cm}^2$ ), BASi Ag/AgNO<sub>3</sub> (0.1 M) reference electrode in 0.1 M  $\text{TBAPF}_6$  acetonitrile solution at room temperature, and Pt mesh counter electrode in 0.2 M  $\text{TBAPF}_6$  acetonitrile solutions 2 or 4 mL total volume. Acetonitrile was previously dried by passage through a neutral alumina column under argon.  $\text{TBAPF}_6$  was dried prior to CV measurements. All CVs were recorded with compensation for solution resistance, and potentials were referenced to the ferrocenium/ferrocene ( $\text{Fc}^+/\text{Fc}$ ) couple. Appropriate background scans were subtracted from all CVs. Solutions were stirred between acquisition of individual CVs and the working electrode was polished before each measurement.

Bulk electrolysis was performed using a glassy carbon rod (7 mm  $\times$  5 cm) working electrode and a platinum mesh auxiliary electrode in a gas-tight electrochemical cell. The amount of  $\text{H}_2$  gas produced in the headspace was analyzed by an Agilent 7890A GC. The potentials for electrolysis were  $-1.77$  V for **1-Ni**,  $-1.85$  V for **2-Ni**, and  $-1.75$  V for **3-Ni** (all potentials are referenced to  $\text{Fc}^+/\text{Fc}$ ).

- 
1. Chang CJ, Yeh CY, Nocera DG (2002) Porphyrin architectures bearing functionalized xanthene spacers. *J Org Chem* 67:1403–1406.
  2. Laha JK, Dhanalekshmi S, Taniguchi M, Ambrose A, Lindsey JS (2003) A scalable synthesis of meso-substituted dipyrromethanes. *Org Proc Res Dev* 7:799–812.

## X-Ray Crystallographic Details

**ZnHPX1Br (2-Zn) X-ray Data.** Crystals of **2-Zn** were mounted on a Bruker three circle goniometer platform equipped with an APEX detector. A graphite monochromator was employed for wavelength selection of the Mo K $\alpha$  radiation ( $\lambda = 0.71073 \text{ \AA}$ ). The data were processed and refined using the program SAINT supplied by Siemens Industrial Automation. Structures were solved by direct methods in SHELXS and refined by standard difference Fourier techniques in the SHELXTL program suite (6.10 v., Sheldrick G. M., and Siemens Industrial Automation, 2000). Hydrogen atoms bound to carbon were placed in calculated positions using the standard riding model and refined isotropically. Hydrogen atoms bound to oxygen were located in the difference map and refined semi-freely; they were restrained to a distance of  $0.84 \text{ \AA}$  from the oxygen atom, and the isotropic displacement parameter was constrained to a value of 1.2 times that of the oxygen atom. All non-hydrogen atoms were refined anisotropically.

The complex **2-Zn** crystallized with a water molecule bound to the Zn(II) center, with a geometry that approximates square pyramidal (Figure S1). There are two crystallographically independent molecules per asymmetric unit, which in general are conformationally similar. The zinc atoms sit above the plane of their respective macrocycle, residing  $0.192$  and  $0.206 \text{ \AA}$  above the mean plane of the four pyrrolic nitrogen atoms. The  $\text{C}_6\text{F}_5$  substituents are considerably twisted relative to this N4 plane, with dihedral angles of  $74.8^\circ$ ,  $75.2^\circ$  and  $89.5^\circ$  for one molecule and  $73.2^\circ$ ,  $73.4^\circ$  and  $86.9^\circ$  for the other, as determined by considering the angle between the N4 mean plane and the phenyl ring. The largest of these angles is for the meso substituent that is trans to the xanthene backbone. The major distinction between the two independent molecules is in the dihedral angle of the xanthene substituent, again measured as the angle between the N4 mean plane and the six-membered aryl ring bonded directly to the meso carbon. In one molecule this angle is  $52.6^\circ$ , whereas it is much larger at  $67.2^\circ$  for the second. This latter value is very similar to the dihedral angles of the aqua-bridged dimer  $(\text{ZnHPXCO}_2\text{H})_2(\mu\text{-OH}_2)$  which we recently reported.<sup>3</sup> In both independent molecules of  $\text{Zn}(\text{OH}_2)\text{HPX1Br}$ , the bound water molecule is on the same side of the macrocycle as the hanging bromide substituent, though the two are too far apart to consider an intramolecular hydrogen bonding interaction; the distances between the aqua oxygen atoms and the adjacent bromides are  $4.458(3)$  and  $4.336(3) \text{ \AA}$ . However, the crystal structure does suggest an intermolecular hydrogen-bonding interaction between an aqua proton and a symmetry-generated  $\text{C}_6\text{F}_5$  fluoride (ortho to the meso carbon). The  $\text{O}\cdots\text{F}$  distances of  $2.898(4)$  and  $2.996(4) \text{ \AA}$ , with the associated  $\text{O-H}\cdots\text{F}$  angles of  $170(5)$  and  $166(5)^\circ$ , are indicative of intermolecular hydrogen-bonding stabilization in the crystal structure.

---

3. Dogutan DK, Bediako DK, Teets TS, Schwalbe M, Nocera DG (2010) Efficient synthesis of hangman porphyrins. *Org Lett* 12:1036–1039.

**NiHPXCO<sub>2</sub>H (1-Ni) X-ray Data.** Crystals of **1-Ni** were obtained by slow evaporation from a CH<sub>2</sub>Cl<sub>2</sub>/hexanes solution of **1-Ni**. The X-ray structure of **1-Ni** is shown in main text Figure 1. The central nickel atom is found in a square planar coordination environment with sum of  $\angle\text{N-Ni-N}$  equaling 360°, indicating that the Ni is not appreciably displaced from the N<sub>4</sub> plane of the pyrrolic nitrogen atoms. The Ni-N distances are not perfectly equivalent as three Ni-N distances are 1.951(3) Å with the remaining Ni-N distance found to be slightly shorter at 1.940(3) Å. The macrocycle distorts only slightly from perfectly square planar with the two pairs of *trans* meso-carbon atoms bending ~10° out of the N<sub>4</sub> plane in opposing directions. These solid state metrics are comparable to those of the previous reported cobalt porphyrin (CoHPX<sub>3</sub>CO<sub>2</sub>H).<sup>4</sup> This cobalt analog possessing mesityl substituents is similarly planar with the Co atom not appreciably displaced from N<sub>4</sub> plane of pyrrolic nitrogen atoms. As mentioned in the text, one notable difference in the crystallographic structures of **1-Ni** and CoHPX<sub>3</sub>CO<sub>2</sub>H<sup>4</sup> is the apically coordinated solvent molecule found in the structure of CoHPX<sub>3</sub>CO<sub>2</sub>H.<sup>4</sup> This difference can be explained by the d<sub>z<sup>2</sup></sub> orbital of the d<sup>8</sup> Ni being fully populated and thus not available for interactions with apical ligands. The M-H distances found for NiHPXCO<sub>2</sub>H and CoHPX<sub>3</sub>CO<sub>2</sub>H<sup>4</sup> are also similar as they are found to be 4.46 Å and 4.25 Å respectively. The 0.21 Å difference in M-H distance is due to a larger bending angle in the xanthene backbone for the CoHPX<sub>3</sub>CO<sub>2</sub>H<sup>4</sup> (13.9° for Co, 7.1° for Ni), which positions the hanging group closer to the metal center. As this effect is likely due to packing effects in the solid state and not indicative of solution behavior, the Co and Ni complexes can be viewed as structurally analogous with differences in subsequent chemistry being attributed to electronic effects and not underlying structural difference.

## Synthetic Details

**5-[4-(5-Bromo-2,7-di-*tert*-butyl-9,9-dimethylxanthene)]-10,15,20-tris(pentafluorophenyl)porphyrinatonicel (II) (2-Ni).** A microwave glass tube (10 mL) containing a magnetic stir bar was charged with 8 mL of CHCl<sub>3</sub>:MeOH (7 mL:1 mL) and sample of HPXBr (**2**) (0.0500 g, 0.0414 mmol). The solution was stirred at room temperature for 10 min to obtain a homogenous mixture. A sample of NiBr<sub>2</sub> (0.226 g, 1.035 mmol, 25 mol equiv to **2**) was added. The resulting mixture was stirred at room temperature for 5 min. The reaction vessel was sealed with a septum and subjected to microwave irradiation at 65 °C. The protocol was as follows: (1) heat the reaction vessel from room temperature to 65 °C, (2) hold at 65 °C and irradiate for 20 min (temperature overshoots of 67 - 70 °C were permitted; temperature was re-established at 65 °C by using open flow valve option), (3) allow the reaction mixture to cool to room temperature, (4) check the reaction mixture by silica TLC analysis (Hexanes:CH<sub>2</sub>Cl<sub>2</sub> 4:1), (5) repeat steps 1 - 4 until all of the free base

---

4. McGuire Jr R, Dogutan DK, Teets TS, Suntivich J, Shao-Horn Y, Nocera DG (2010) Oxygen reduction reactivity of cobalt(II) hangman porphyrins. *Chem Sci* 1:411-414.

starting material, **2**, was consumed (6 - 8 h). Upon complete reaction, triethylamine (10 mole equiv to metal salt) was added to the solution, which was washed with water and brine, dried over Na<sub>2</sub>SO<sub>4</sub>, and concentrated to dryness. The resulting crude product was chromatographed [silica, Hexanes:CH<sub>2</sub>Cl<sub>2</sub> 1:1 → 1:4] to afford dark purple solid (48 mg, 91%). <sup>1</sup>H NMR (500 MHz, CDCl<sub>3</sub>) δ / ppm: 1.25 (s, 9H), 1.53 (s, 9H), 1.88 (s, 6H), 7.08 (d, *J* = 2.0 Hz, 1H), 7.40 (d, *J* = 2.0 Hz, 1H), 7.87 (d, *J* = 2.5 Hz, 1H), 7.94 (d, *J* = 2.5 Hz, 1H), 8.72 (d, *J* = 5.0 Hz, 2H), 8.83 (s, 4H), 8.92 (d, *J* = 5.0 Hz, 2H); Anal. Calcd. for M = C<sub>61</sub>H<sub>36</sub>BrNiF<sub>15</sub>N<sub>4</sub>O: Cald. 1264.5382. Found for HR(ESI)-MS: 1265.1297; LD-MS. 1264.15. λ<sub>max,abs</sub>/nm (CH<sub>2</sub>Cl<sub>2</sub>) = 407, 525, 559.

**5-[4-(2,7-Di-*tert*-butyl-5-methoxycarbonyl-9,9-dimethylxanthene)]-10,15,20-tris-(pentafluorophenyl)-porphyrinatonicel(II) (NiHPX-CO<sub>2</sub>Me, 4-Ni).** A microwave glass tube (10 mL) containing a magnetic stir bar was charged with 5.5 mL of CHCl<sub>3</sub>:MeOH (4.4 mL:1.1 mL) and sample of HPXCO<sub>2</sub>Me (**4**) (0.0300 g, 0.025 mmol). The solution was stirred at room temperature for 10 min to obtain a homogenous mixture. A sample of NiBr<sub>2</sub> (0.138 g, 0.632 mmol, 25 mol equiv to **4**) was added. The resulting mixture was stirred at room temperature for 5 min. The reaction vessel was sealed with a septum and subjected to microwave irradiation at 65 °C. The protocol was as follows: (1) heat the reaction vessel from room temperature to 65 °C, (2) hold at 65 °C and irradiate for 20 min (temperature overshoots of 67 - 70 °C were permitted; temperature was re-established at 65 °C by using open flow valve option), (3) allow the reaction mixture to cool to room temperature, (4) check the reaction mixture by silica TLC analysis (Hexanes:CH<sub>2</sub>Cl<sub>2</sub> 4:1), (5) repeat steps 1 - 4 until all of the free base HPXCO<sub>2</sub>Me starting material was consumed (8 - 10 h). Upon complete reaction, triethylamine (10 mol equiv to metal salt) was added to the solution, which was washed with water and brine, dried over Na<sub>2</sub>SO<sub>4</sub>, and concentrated to dryness. The resulting crude product was chromatographed [silica, hexanes:CH<sub>2</sub>Cl<sub>2</sub> silica, hexanes:CH<sub>2</sub>Cl<sub>2</sub> 1:1 → 1:6] to afford dark purple solid (28 mg, 90%). <sup>1</sup>H NMR (500 MHz, CDCl<sub>3</sub>) δ / ppm: 0.69 (s, 3H), 1.27 (s, 9H), 1.41 (s, 9H), 1.91 (s, 6H), 7.37 (d, *J* = 2.0 Hz, 1H), 7.55 (d, *J* = 2.0 Hz, 1H), 7.64 (d, *J* = 2.5 Hz, 1H), 7.83 (d, *J* = 2.5 Hz, 1H), 8.66 (d, *J* = 5.0 Hz, 2H), 8.77 (s, 4H), 8.84 (d, *J* = 5.0 Hz, 2H); Anal. Calcd. for M = C<sub>63</sub>H<sub>39</sub>F<sub>15</sub>N<sub>4</sub>NiO<sub>3</sub>: Cald. 1242.2134. Found for HR(ESI)-MS: 1243.2209 (M+H). λ<sub>max,abs</sub>/nm (CH<sub>2</sub>Cl<sub>2</sub>) = 407, 525, 558.

**5-[4-(2,7-Di-*tert*-butyl-5-hydroxycarbonyl-9,9-dimethylxanthene)]-10,15,20-tris-(pentafluorophenyl)-porphyrinatonicel(II) (1-Ni).** A microwave glass tube (10 mL) containing a magnetic stir bar was charged with 5.5 mL of CHCl<sub>3</sub>:MeOH (4.4 mL:1.1 mL) and sample of **1** (0.0520 g, 0.044 mmol). The solution was stirred at room temperature for 10 min to obtain a homogenous mixture. A sample of NiBr<sub>2</sub> (0.240 g, 1.10 mmol, 25 mol equiv to **1**) was added. The resulting mixture was stirred at room temperature for 5 min. The reaction vessel was sealed with a septum and subjected to microwave irradiation at 65 °C. The protocol was as follows: (1) heat the reaction vessel from room temperature to 65 °C, (2) hold at 65 °C and irradiate for 20 min (temperature overshoots of 67 - 70 °C were

permitted; temperature was re-established at 65 °C by using open flow valve option), (3) allow the reaction mixture to cool to room temperature, (4) check the reaction mixture by silica TLC analysis (hexanes:CH<sub>2</sub>Cl<sub>2</sub> 4:1), (5) repeat steps 1 - 4 until all of the free base HPXCO<sub>2</sub>H starting material was consumed (8 - 10 h). Upon complete reaction, triethylamine (10 mol equiv to metal salt) was added to the solution, which was washed with water and brine, dried over Na<sub>2</sub>SO<sub>4</sub>, and concentrated to dryness. The resulting crude product was chromatographed [silica, hexanes:CH<sub>2</sub>Cl<sub>2</sub> silica, hexanes:CH<sub>2</sub>Cl<sub>2</sub> 1:1 → 1:9] to afford dark purple solid (51 mg, 94%). <sup>1</sup>H NMR (500 MHz, CDCl<sub>3</sub>) δ / ppm: 1.26 (s, 9H), 1.49 (s, 9H), 1.93 (s, 6H), 7.32-7.46 (brs, 1H), 7.71 (dd, *J* = 2.5 Hz, 2H), 7.91 (dd, *J* = 8.5 Hz, 2H), 8.69 (d, *J* = 5.0 Hz, 2H), 8.78 (s, 4H), 8.81 (d, *J* = 5.5 Hz, 2H);. Anal. Calcd. for M = C<sub>62</sub>H<sub>37</sub>F<sub>15</sub>N<sub>4</sub>NiO<sub>3</sub>: Cald. 1229.6516. Found for HR(ESI)-MS: 1251.1866 (M+Na); LD-MS. 1229.18. λ<sub>max,abs</sub>/nm (CH<sub>2</sub>Cl<sub>2</sub>) = 406, 524, 558.

### Spectroelectrochemical Studies

UV-vis spectroelectrochemical measurements were made using a quartz thin layer cell (0.5 mm path length) at room temperature in a N<sub>2</sub>-filled glovebox with an Ocean Optics USB4000 spectrophotometer and DT-Mini-2GS UV-vis-NIR light source using an optically transparent platinum flag working electrode, platinum wire counter electrode, and Ag wire reference electrode (BASi). Cyclic voltammetry and controlled potential electrolysis in the thin layer cell were carried out using a CH Instruments 730C Electrochemical Workstation. Samples were prepared in 0.1 M TBAPF<sub>6</sub> acetonitrile at a 0.6 mL total volume.

### Computational Details

Structures were optimized with density functional theory (DFT) using a variety of exchange-correlation functionals: B3P86,<sup>5,6</sup> B3LYP,<sup>6,7</sup> BP86,<sup>5,8</sup> BLYP,<sup>7,8</sup> TPSSh,<sup>9</sup> M06L,<sup>10</sup> and ωB97XD.<sup>11-14</sup> Optimizations were performed with the 6-31+G(d,p)<sup>15</sup> basis set for the

- 
5. Perdew JP (1986) Density-functional approximation for the correlation energy of the inhomogeneous electron gas. *Phys Rev B* 33:8822–8824.
  6. Becke AD (1993) Densityfunctional thermochemistry. III. The role of exact exchange. *J Chem Phys* 98:5648–5652.
  7. Lee C, Yang W, Parr RG (1988) Development of the Colle-Salvetti correlation-energy formula into a functional of the electron density. *Phys Rev B* 37:785–789.
  8. Becke AD (1988) Density-functional exchange-energy approximation with correct asymptotic behavior. *Phys Rev A* 38:3098–3100.
  9. Tao JM, Perdew JP, Staroverov VN, Scuseria GE (2003) Climbing the Density Functional Ladder: Nonempirical Meta-Generalized Gradient Approximation Designed for Molecules and Solids. *Phys Rev Lett* 91:146401/1-4.
  10. Zhao Y, Truhlar DG (2006) A new local density functional for main-group thermochemistry, transition metal bonding, thermochemical kinetics, and noncovalent interactions. *J Chem Phys* 125:194101/1-18.
  11. Grimme SJ (2006) Semiempirical GGA-type density functional constructed with a long-range dispersion correction. *Comput Chem* 27:1787–1799.

transferring proton and the 6-31+G(d) basis set<sup>16–18</sup> for all other atoms with default options in Gaussian 09.<sup>19</sup> Optimizations and single point energy calculations in acetonitrile solvent utilized the conductor-like polarizable continuum model (C-PCM)<sup>20,21</sup> with Bondi radii and included nonelectrostatic interactions resulting from dispersion,<sup>22,23</sup> repulsion,<sup>23</sup> and cavity formation.<sup>24</sup> Entropic and zero-point energy effects were calculated from the vibrational frequencies at  $T = 298.15$  K and were included in the calculation of the reaction free energies, which in turn were used to calculate the reduction potentials. When optimized in the gas phase, the free energies of the solvated molecules were calculated with gas phase geometries employing a Born–Haber thermodynamic cycle that combines gas phase free energies with single point solvation free energies of the reduced and oxidized species. The detailed procedure is described in our previous publications.<sup>25</sup> Tables S1, S2, and S5 illustrate that the results are qualitatively similar for these two types of geometries. The results in the main paper utilized the geometries optimized in solution. As stated in the main text, for computation tractability, the *tert*-butyl groups on the xanthen backbone and pentafluorophenyl *meso*-substituents of the porphyrin ring were truncated to methyl groups and chlorine atoms,

- 
12. Becke AD (1997) Density-functional thermochemistry. V. Systematic optimization of exchange-correlation functionals. *J Chem Phys* 107:8554–8560.
  13. Kamiya M, Tsuneda T, Hirao K (2002) A density functional study of van der Waals interactions. *J Chem Phys* 117: 6010–6015.
  14. Chai J-D, Head-Gordon M (2008) Long-range corrected hybrid density functionals with damped atom-atom dispersion corrections. *Phys Chem Chem Phys* 10:6615–6620.
  15. Hariharan PC, Pople JA (1973) The influence of polarization functions on molecular orbital hydrogenation energies. *Theor Chim Acta* 28:213–222.
  16. Hehre WJ, Ditchfield R, Pople JA (1972) Self-consistent molecular orbital methods. XII. Further extensions of gaussian-type basis sets for use in molecular orbital studies of organic molecules. *J Chem Phys* 56:2257–2261.
  17. Francl MM, Pietro WJ, Hehre WJ, Binkley JS, Gordon MS, DeFrees DJ, Pople JA (1982) Self-consistent molecular orbital methods. XXIII. A polarization type basis set for second-row elements. *J Chem Phys* 77:3654–3665.
  18. Clark T, Chandrasekhar J, Spitznagel GW, von Schleyer PR (1983) Efficient diffuse function-augmented basis sets for anion calculations. III. The 3-21+G basis set for first-row elements, Li–F. *J Comp Chem* 4:294–301.
  19. Frisch MJ et al. Gaussian, Inc., Wallingford CT, 2009.
  20. Barone V, Cossi M (1998) Quantum calculation of molecular energies and energy gradients in solution by a conductor solvent model *J Phys Chem A* 102:1995–2001.
  21. Cossi M, Rega N, Scalmani G, Barone V (2003) Energies, structures, and electronic properties of molecules in solution with the C-PCM solvation model. *J Comput Chem* 24:669–681.
  22. Floris F, Tomasi J (1989) Evaluation of the dispersion contribution to the solvation energy. A simple computational model in the continuum approximation. *J Comput Chem* 10:616–627.
  23. Floris FM, Tomasi J, Ahuir JLP (1991) Dispersion and repulsion contributions to the solvation energy: Refinements to a simple computational model in the continuum approximation. *J Comput Chem* 12:784–791.
  24. Pierotti RA (1976) A scaled particle theory of aqueous and nonaqueous solutions. *Chem Rev* 76:717–726.
  25. Solis BH, Hammes-Schiffer S (2014) Proton-coupled electron transfer in molecular electrocatalysis: Theoretical methods and design principles. *Inorg Chem* 53:6427–6443.



respectively. These truncations were chosen based on the Hammett constants<sup>26,27</sup> ( $\sigma$ ) of the substituents, which are similar:

| Substituent                    | $\sigma_m^*$ | $\sigma_p^*$ |
|--------------------------------|--------------|--------------|
| —Cl                            | 0.37         | 0.23         |
| —C <sub>6</sub> F <sub>5</sub> | 0.26         | 0.27         |
| — <sup>t</sup> Bu              | -0.10        | -0.20        |
| —CH <sub>3</sub>               | -0.07        | -0.17        |

\*Subscripts “*m*” or “*p*” refer to the position (“*meta*” or “*para*”) of the substituent.

Figures of computational results were created with GaussView 5.0.<sup>28</sup>

### CV Simulation

All simulated CVs were calculated using DigiElch 7 software.<sup>29</sup> Diffusion coefficients of compounds were determined straightforwardly from the peak currents of reversible waves, and these values were used in the relevant simulations. Symmetry factors/transfer coefficients ( $\alpha$  values) were set to 0.5 for all ET steps. Full details of the parameters used in simulation are listed in Tables S3 in the ESI and Table 2 in the manuscript.

For the simulation of trumpet plots, CVs were simulated using the known  $E_{1/2}$  values and diffusion coefficient (determined from the peak current as described in the manuscript) as the fixed input parameter in the model. The CV was then simulated for an initial guess value of the standard heterogeneous rate constant ( $k_{ET}^0$ ) at a particular scan rate,  $\nu$  (say, 10 mV/s). The anodic and cathodic peak potentials were noted. The  $k_{ET}^0$  value was then maintained and  $\nu$  was changed to 30 mV/s, the CV was simulated again and the new peak potentials were noted. This was repeated for  $\nu = 100, 300, 1000, 3000, \dots, 10000$  mV/s. A plot of peak potentials versus  $\log \nu$  was constructed and the simulated data was compared to the experimental result. This procedure is then iterated for different  $k_{ET}^0$  values until a good match is obtained between the experimental points and the simulated values over the entire scan rate range.

---

26. Hansch C, Leo A, Taft RW (1991) A survey of Hammett substituent constants and resonance and field parameters. *Chem Rev* 91:165–195.

27. Solis BH, Hammes-Schiffer S (2011) Substituent effects on cobalt diglyoxime catalysts for hydrogen evolution. *J Am Chem Soc* 133:19036–19039.

28. Dennington R, Keith T, Millam J, Gaussview, Ver. 5, Semichem Inc.: Shawnee Mission, KS, 2009.

29. Rudolf M (2003) Digital simulations on unequally spaced grids.: Part 2. Using the box method by discretisation on a transformed equally spaced grid. *J Electroanal Chem* 543:23–39. DigiElch from Elchsoft under <http://www.elchsoft.com>.

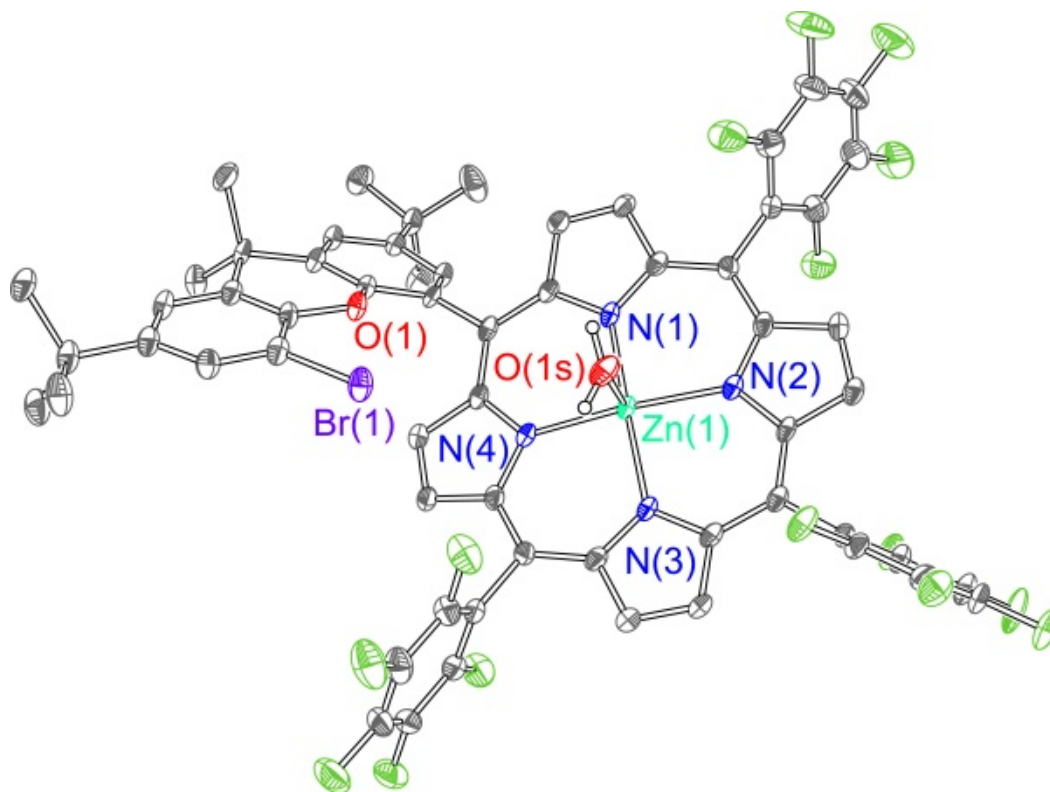

**Figure S1.** X-ray crystal structure of **2-Zn** with thermal ellipsoids set at 50% probability.

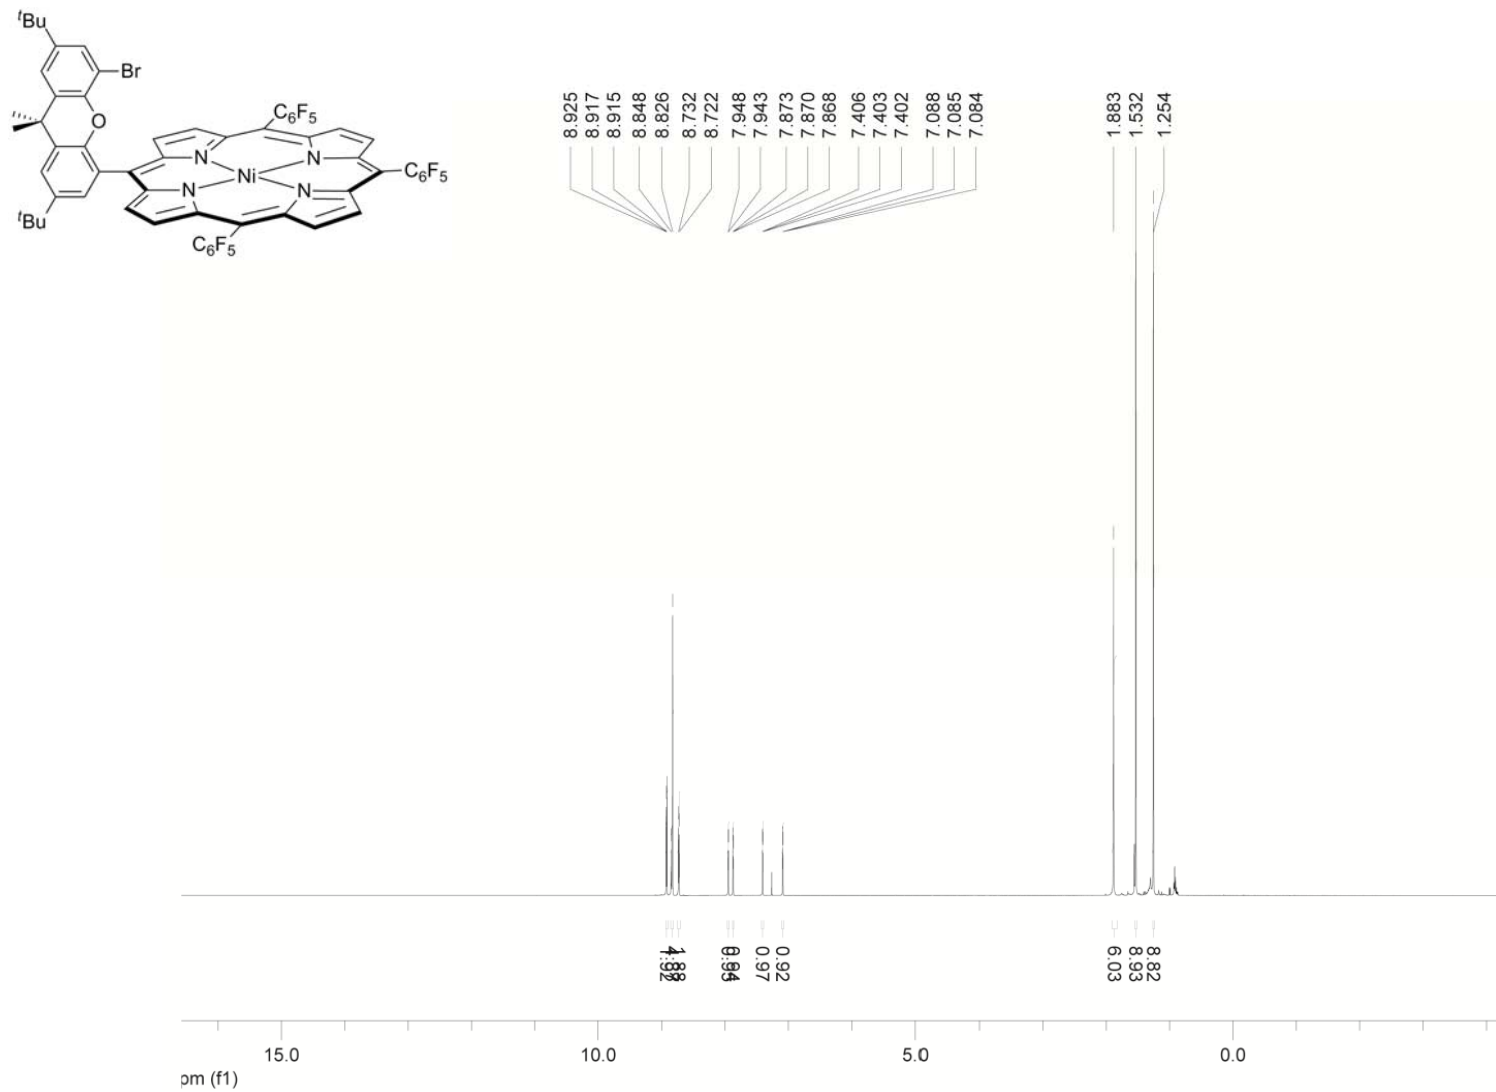

**Figure S2a.** Full <sup>1</sup>H NMR spectrum of NiHPXBr (**2-Ni**).

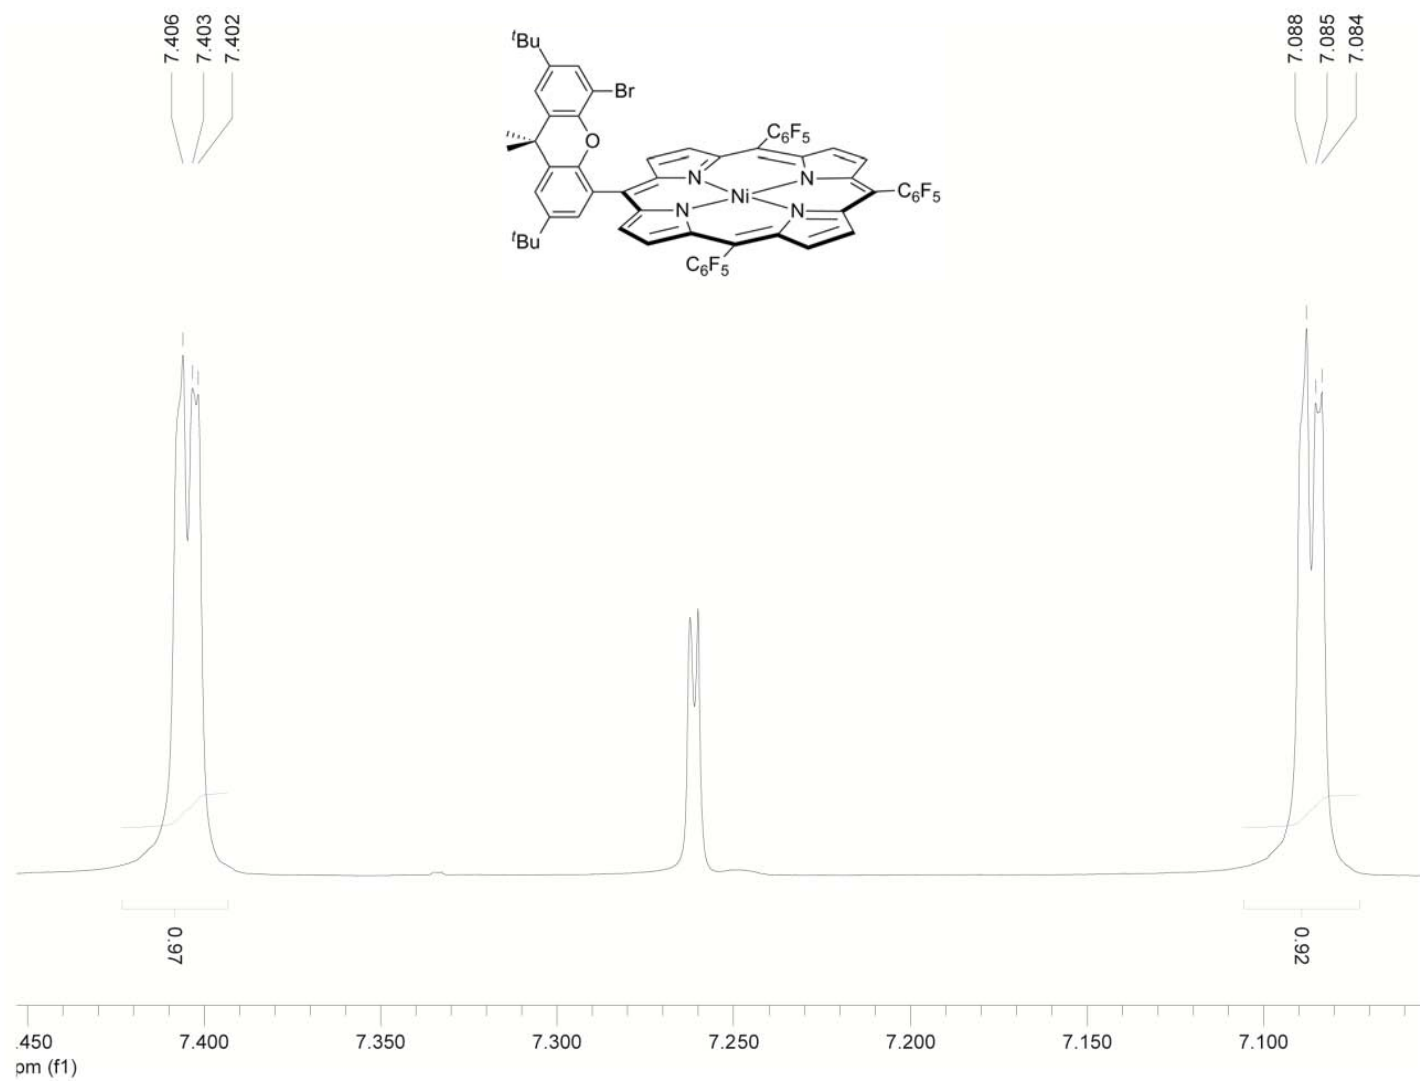

**Figure S2b.** Aromatic region of the  $^1\text{H}$  NMR spectrum of NiHPXBr (**2-Ni**) with integrations and chemical shifts.

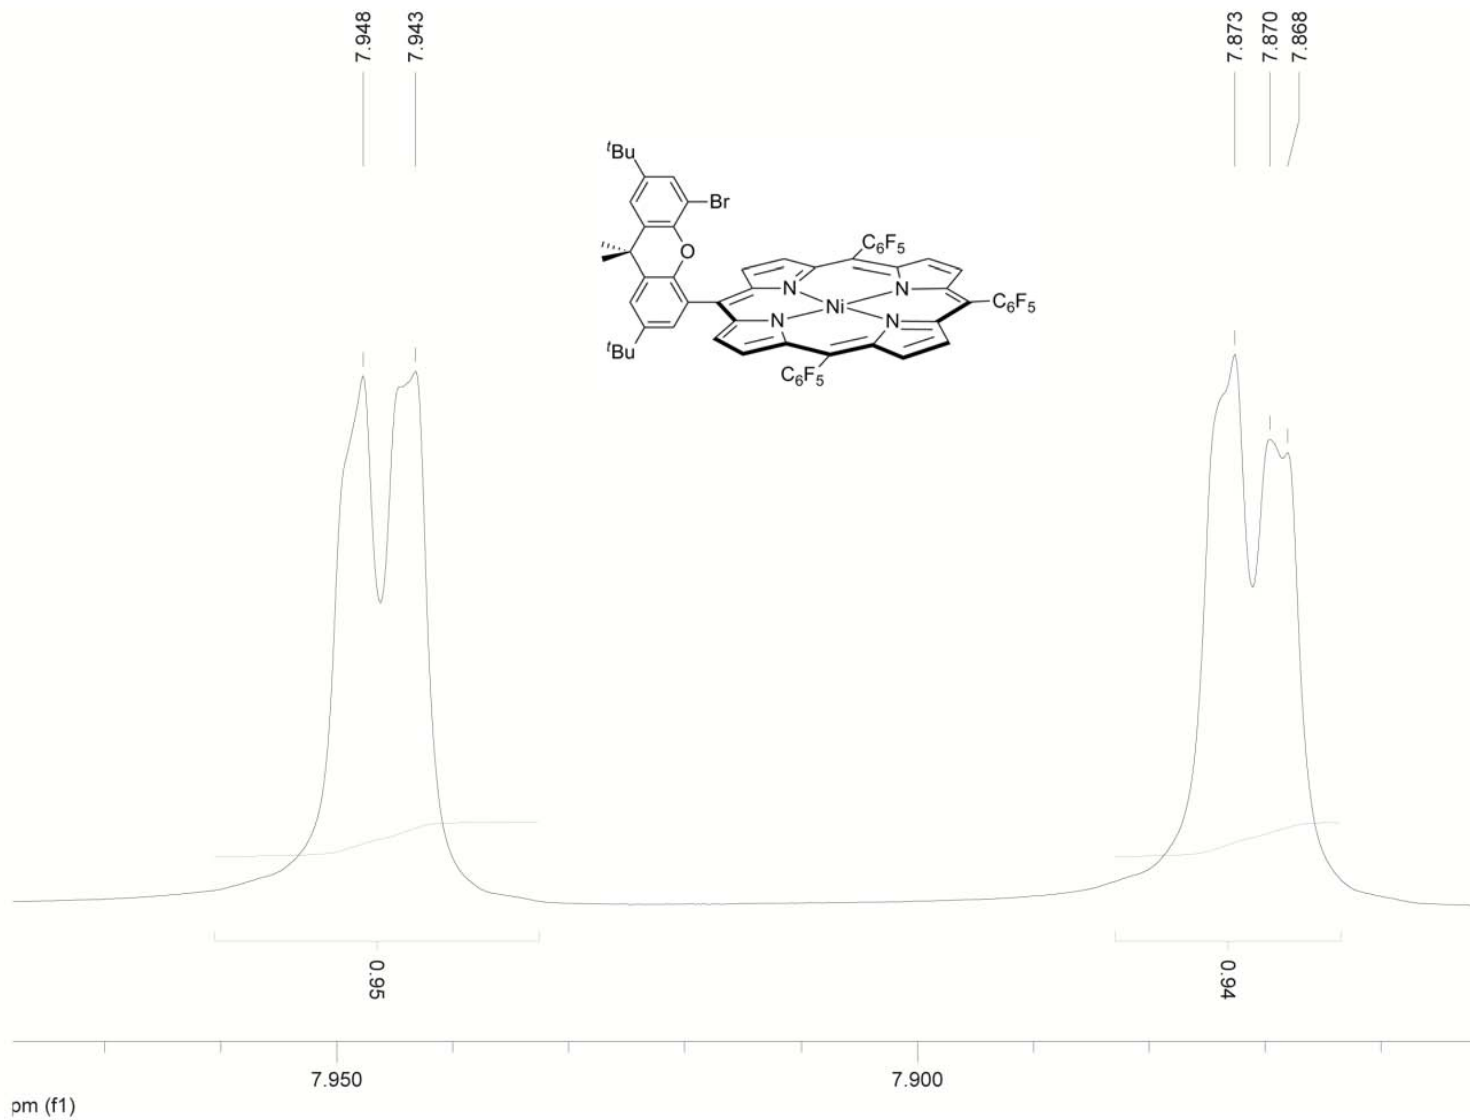

**Figure S2c.** Aromatic region of the <sup>1</sup>H NMR spectrum of NiHPXBr (**2-Ni**) with integrations and chemical shifts.

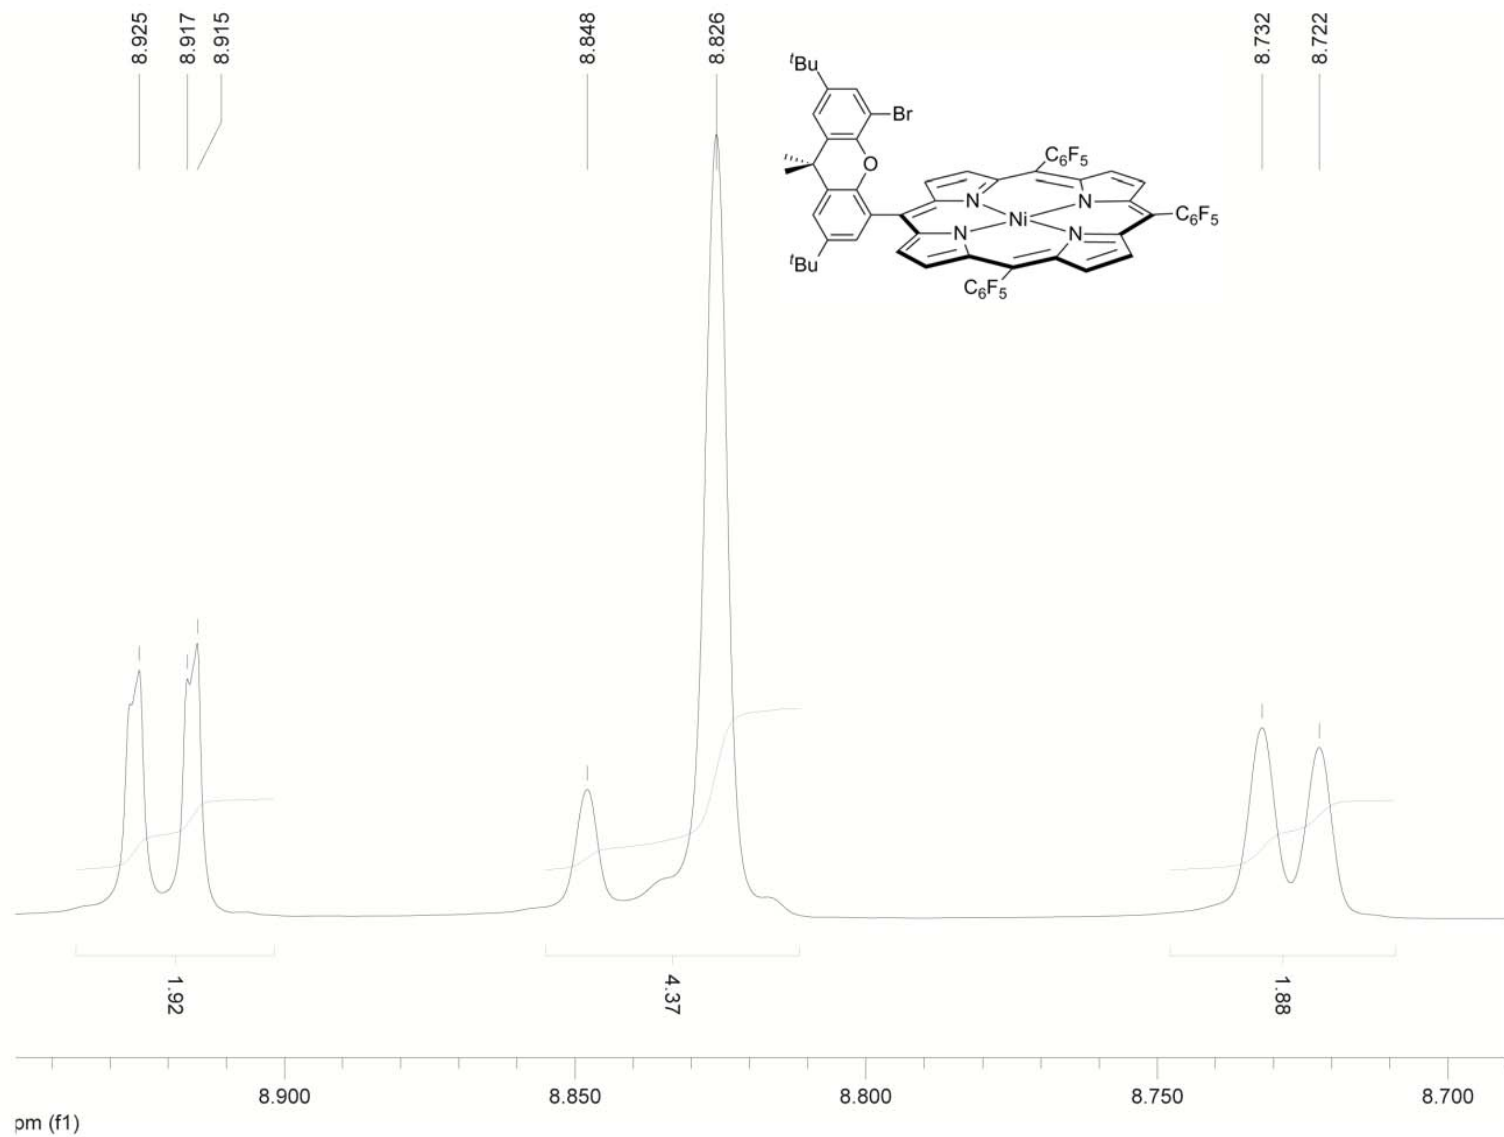

**Figure S2d.** Aromatic region of the <sup>1</sup>H NMR spectrum of NiHPXBr (**2-Ni**) with integrations and chemical shifts.

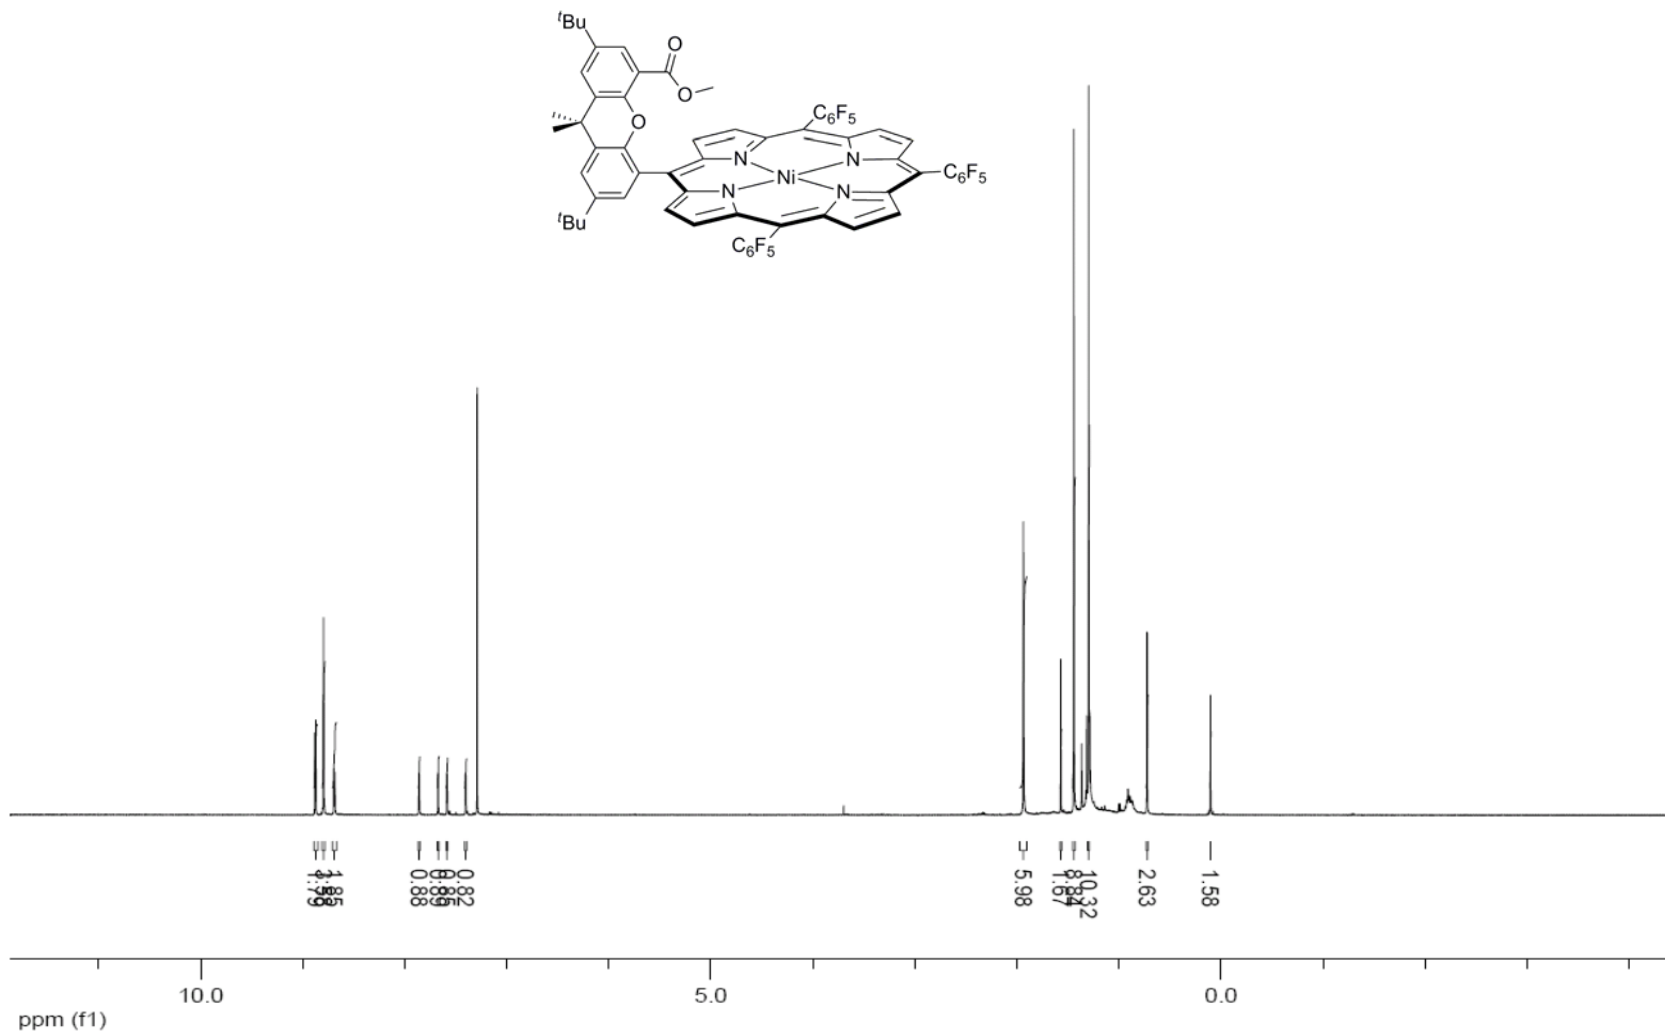

**Figure S3a.** Full <sup>1</sup>H NMR spectrum of NiHPXOMe (4-Ni).

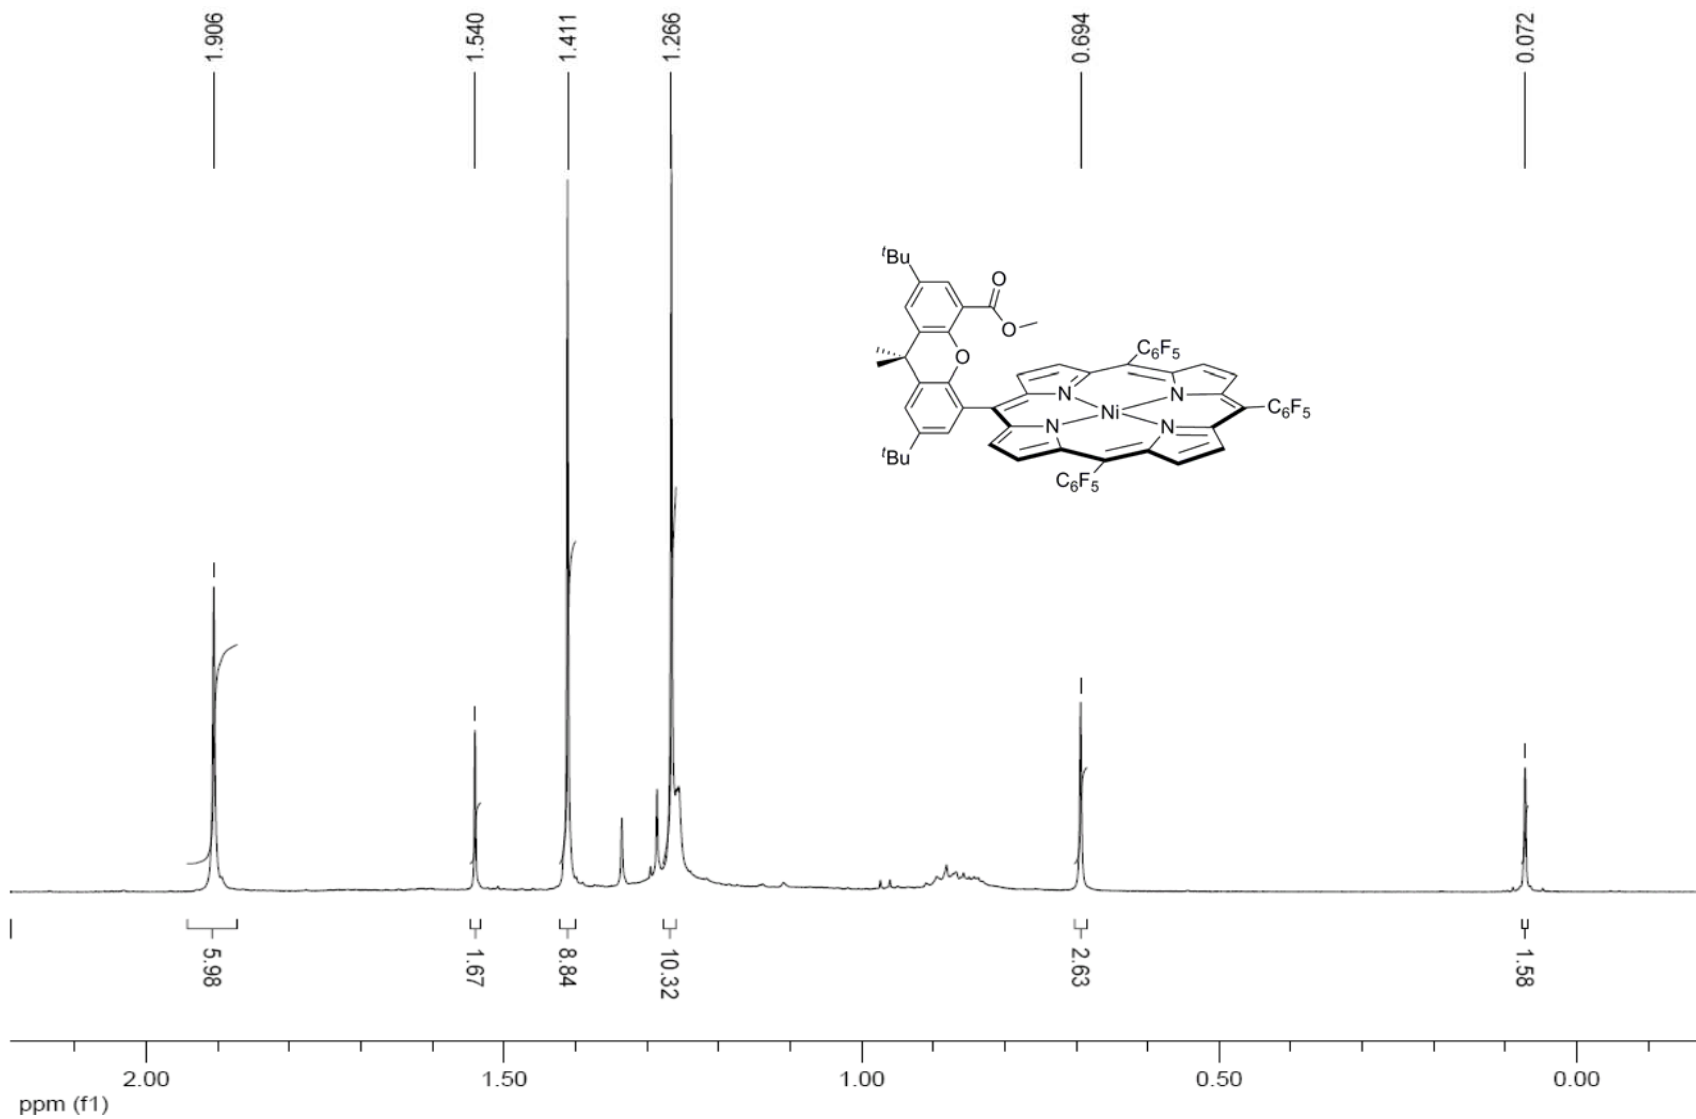

**Figure S3b** Aliphatic region of the <sup>1</sup>H NMR spectrum of NiHPXOMe (4-Ni) with integrations and chemical shifts.



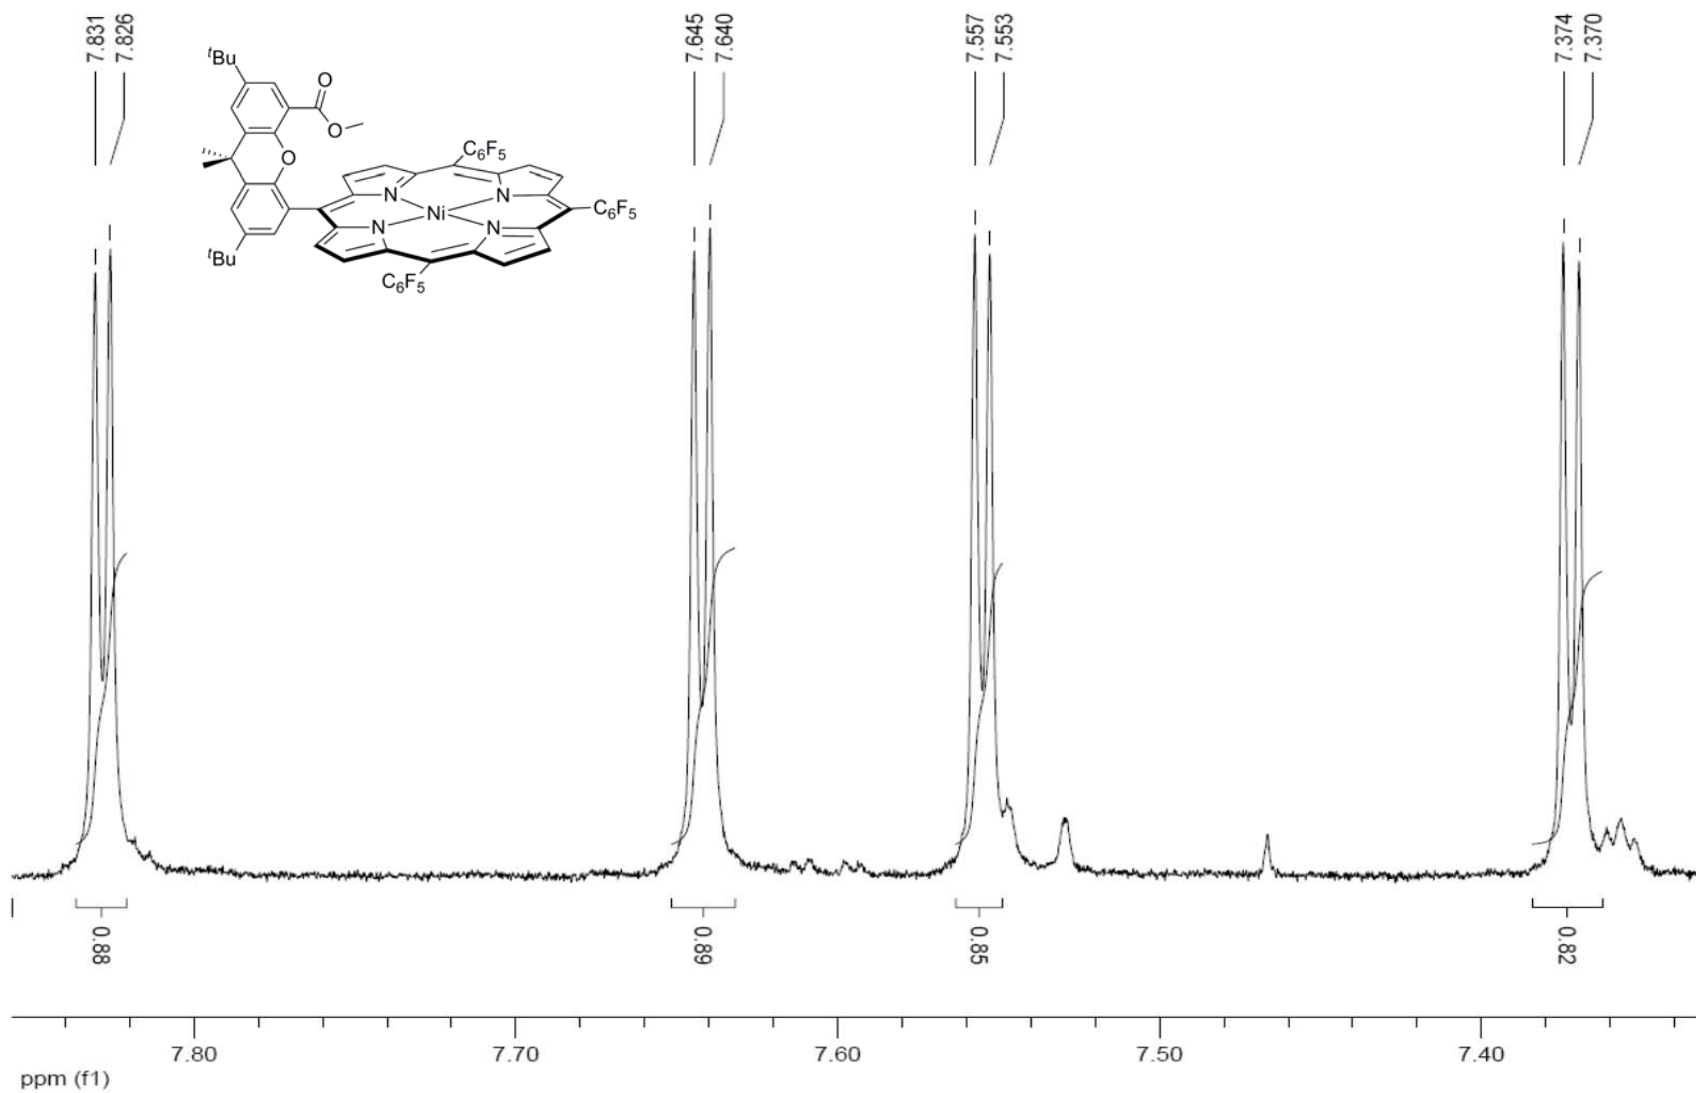

**Figure S3c.** Aromatic region of the  $^1\text{H}$  NMR spectrum of NiHPXOMe (**4-Ni**) with integrations and chemical shifts.

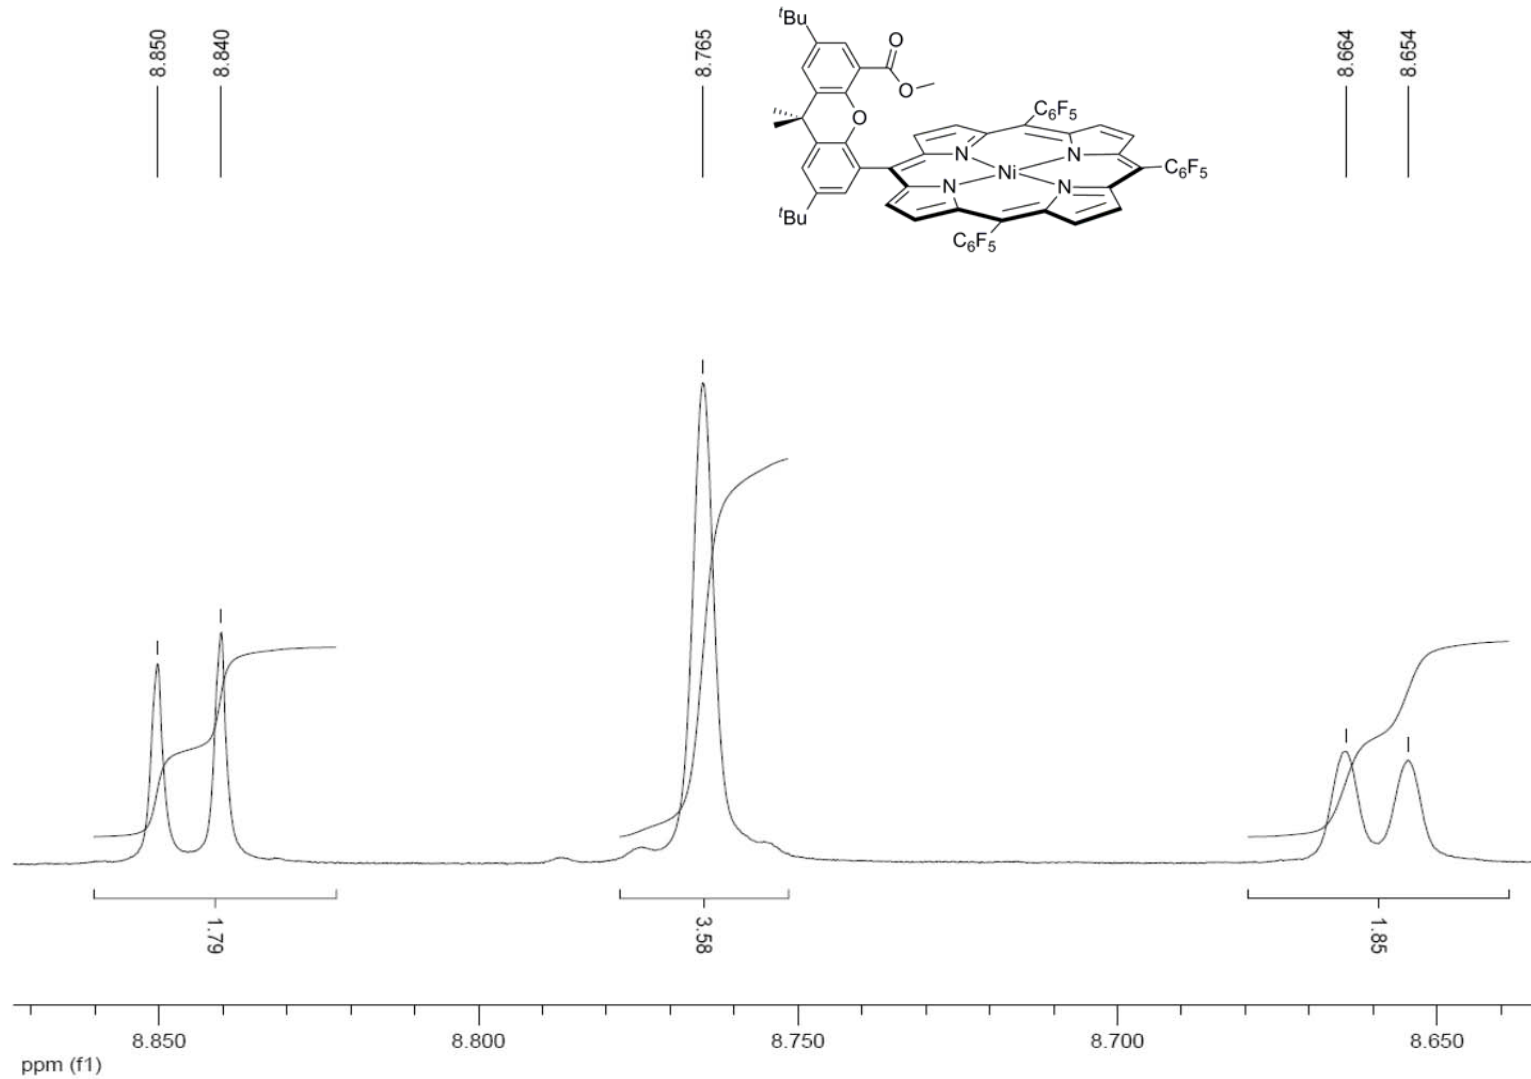

**Figure S3d.** Aromatic region of the  $^1\text{H}$  NMR spectrum of NiHPXOMe (**4-Ni**) with integrations and chemical shifts.

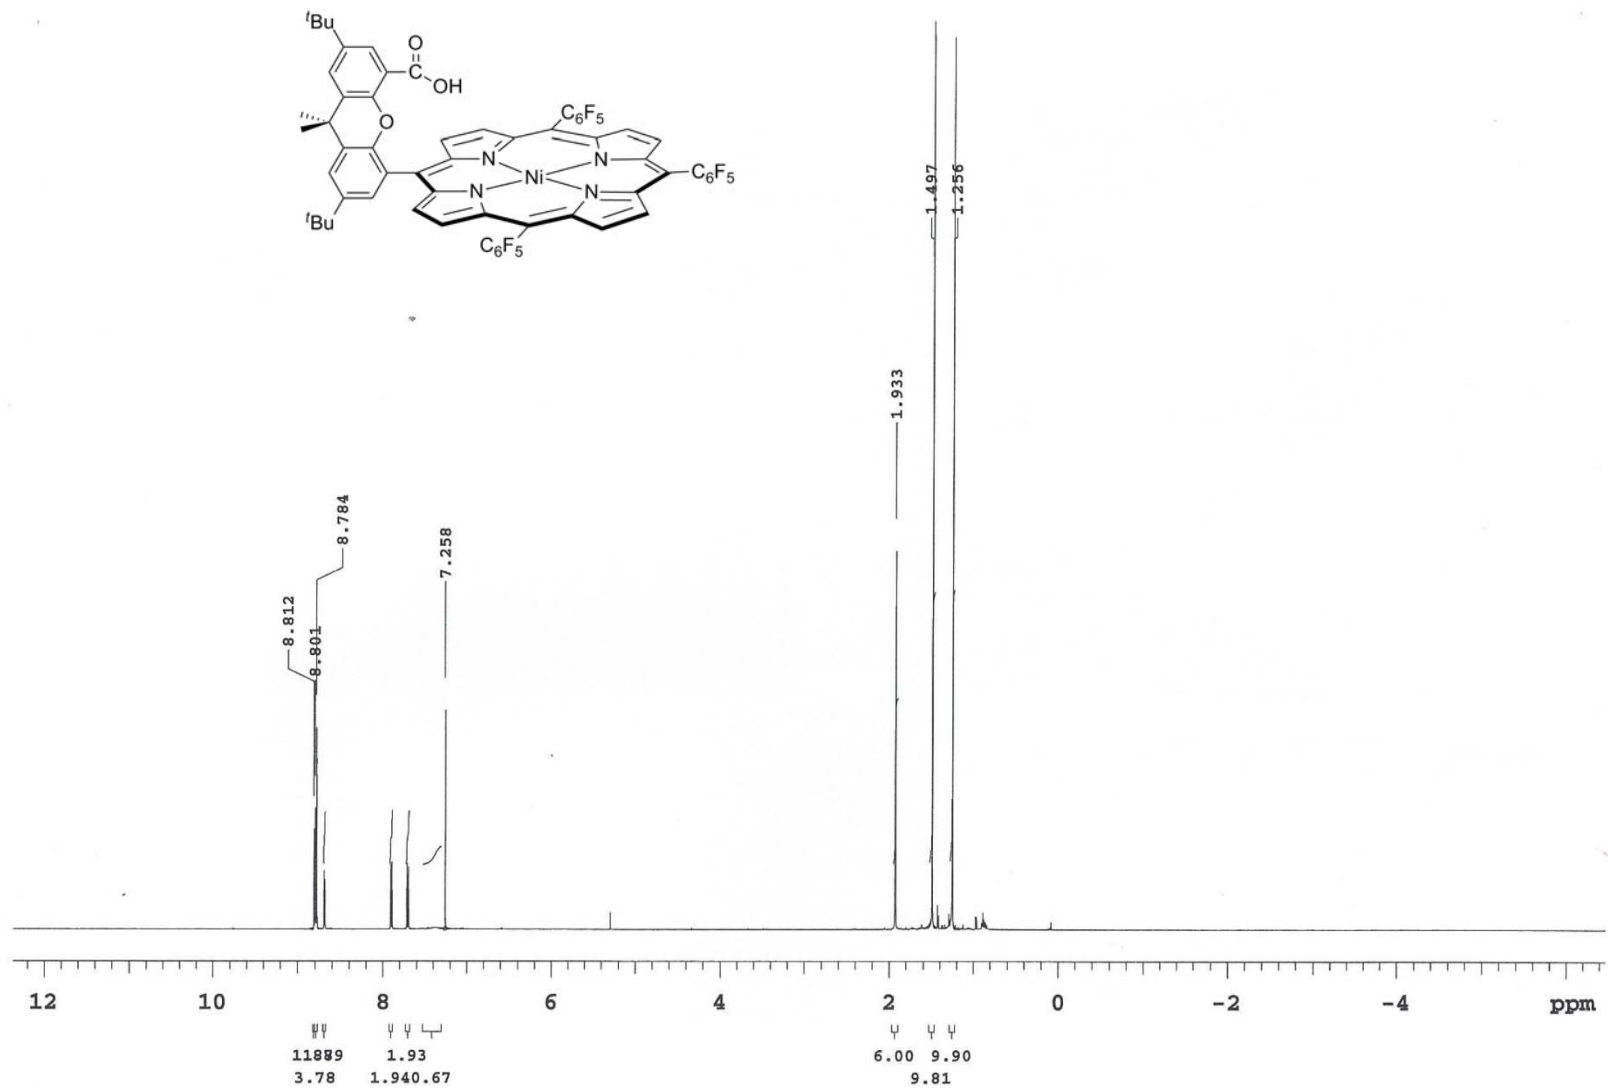

**Figure S4a.** Full <sup>1</sup>H NMR spectrum of NiHPXCO<sub>2</sub>H (1-Ni).

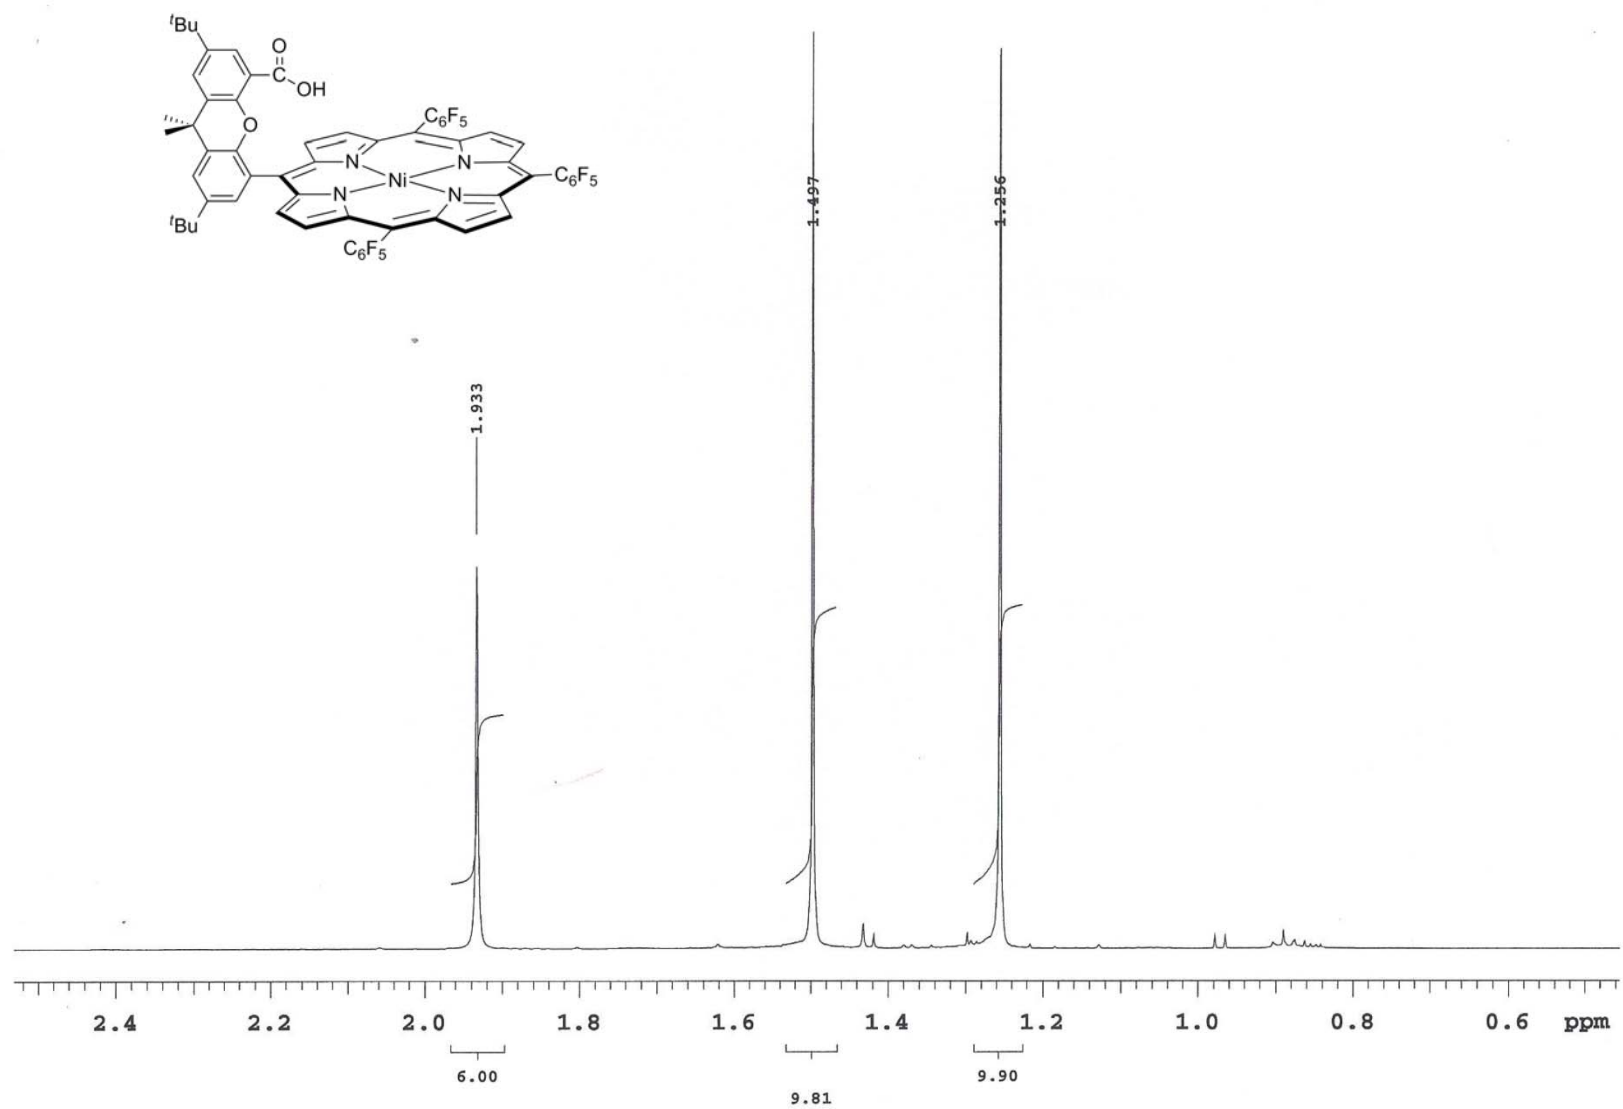

**Figure S4b.** Aliphatic region of the <sup>1</sup>H NMR spectrum of NiHPXCO<sub>2</sub>H (**1-Ni**) with integrations and chemical shifts.

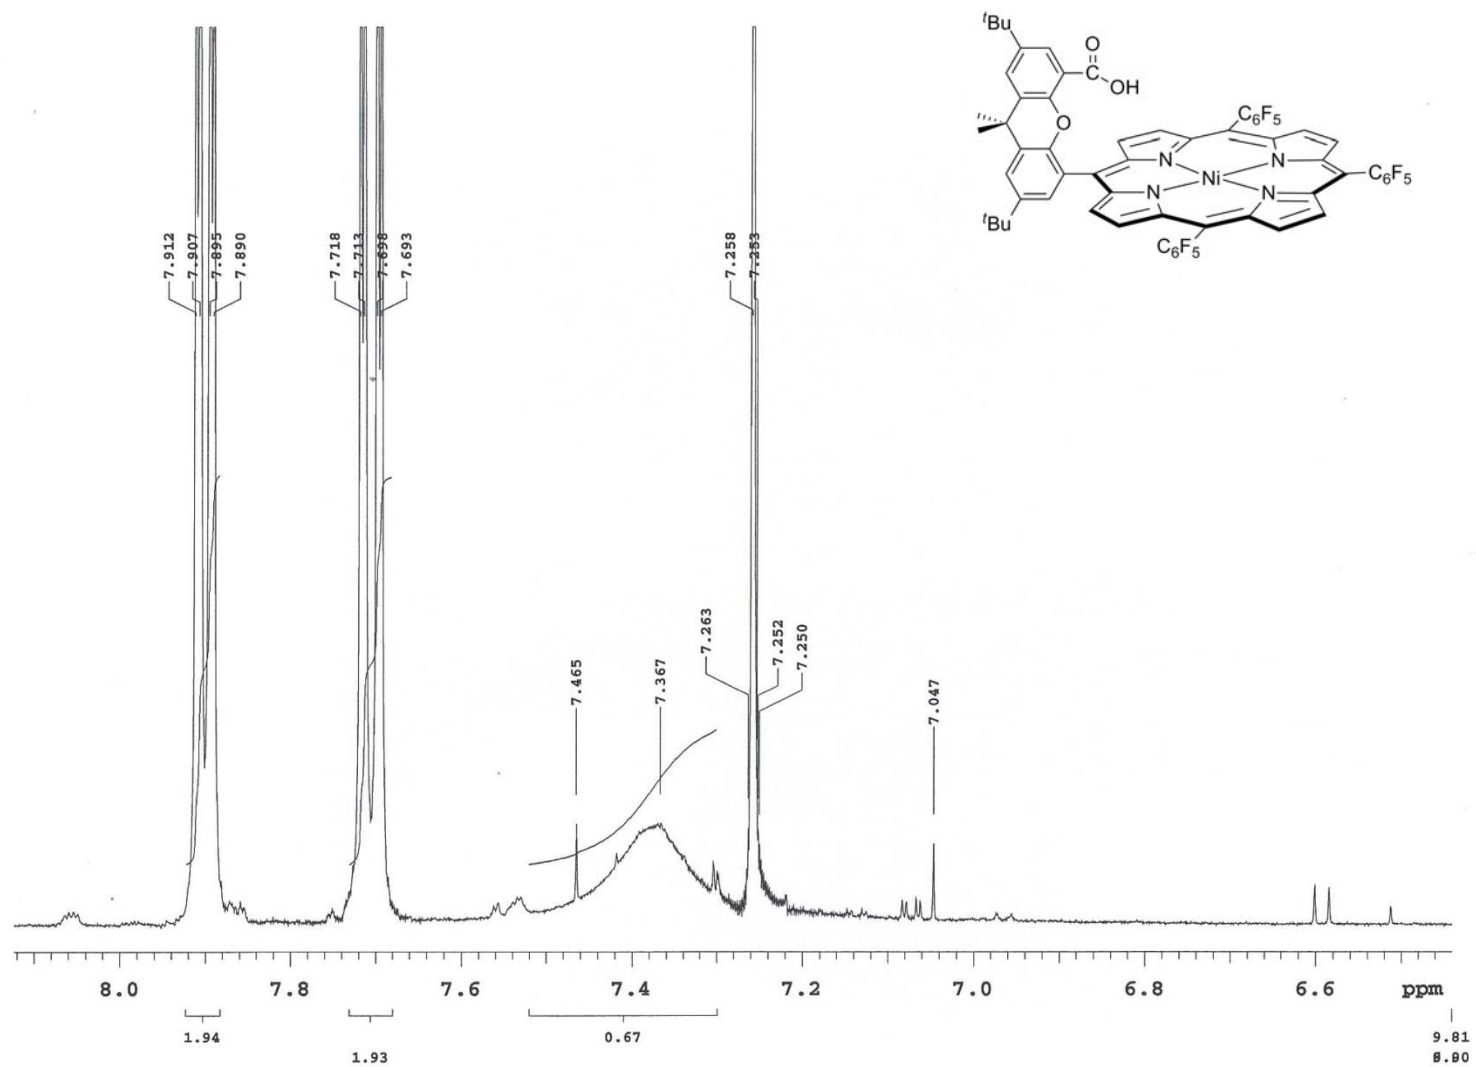

**Figure S4c.** Aliphatic region of the  $^1\text{H}$  NMR spectrum of NiHPXCO<sub>2</sub>H (1-Ni) with integrations and chemical shifts.

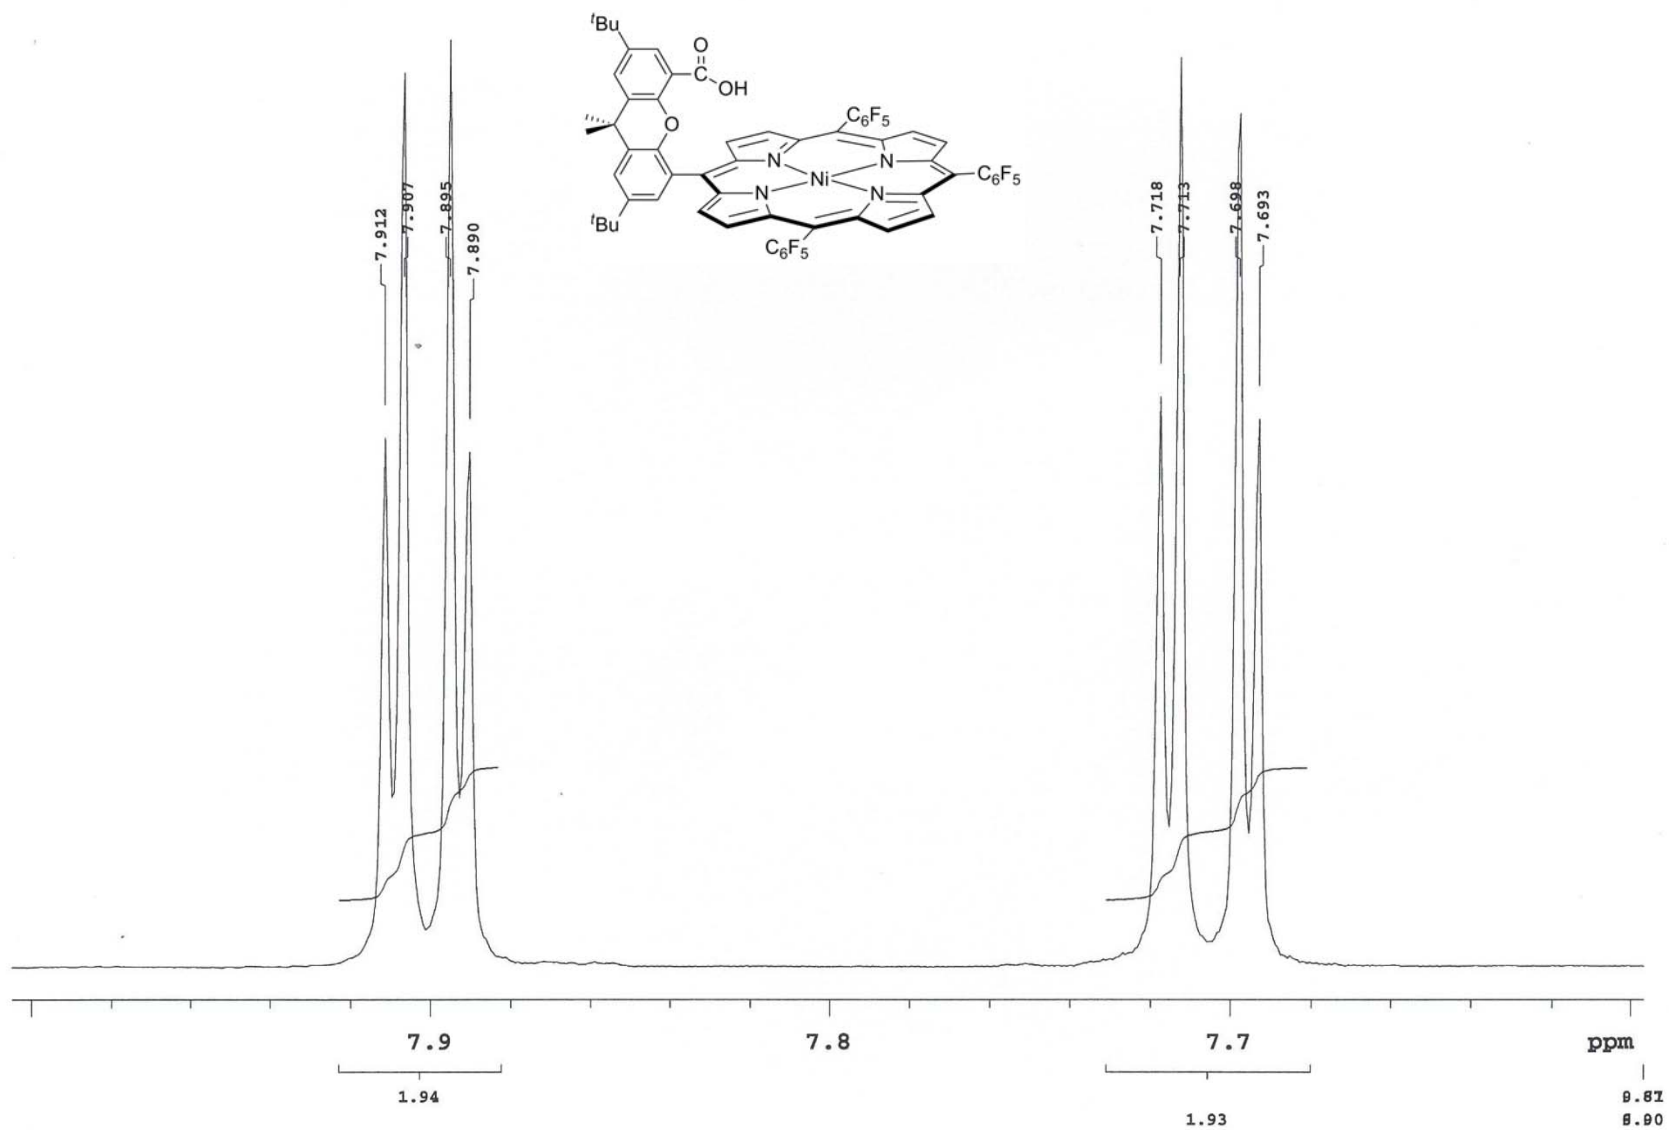

**Figure S4d.** Aromatic region of the <sup>1</sup>H NMR spectrum of NiHPXCO<sub>2</sub>H (**1-Ni**) with integrations and chemical shifts.

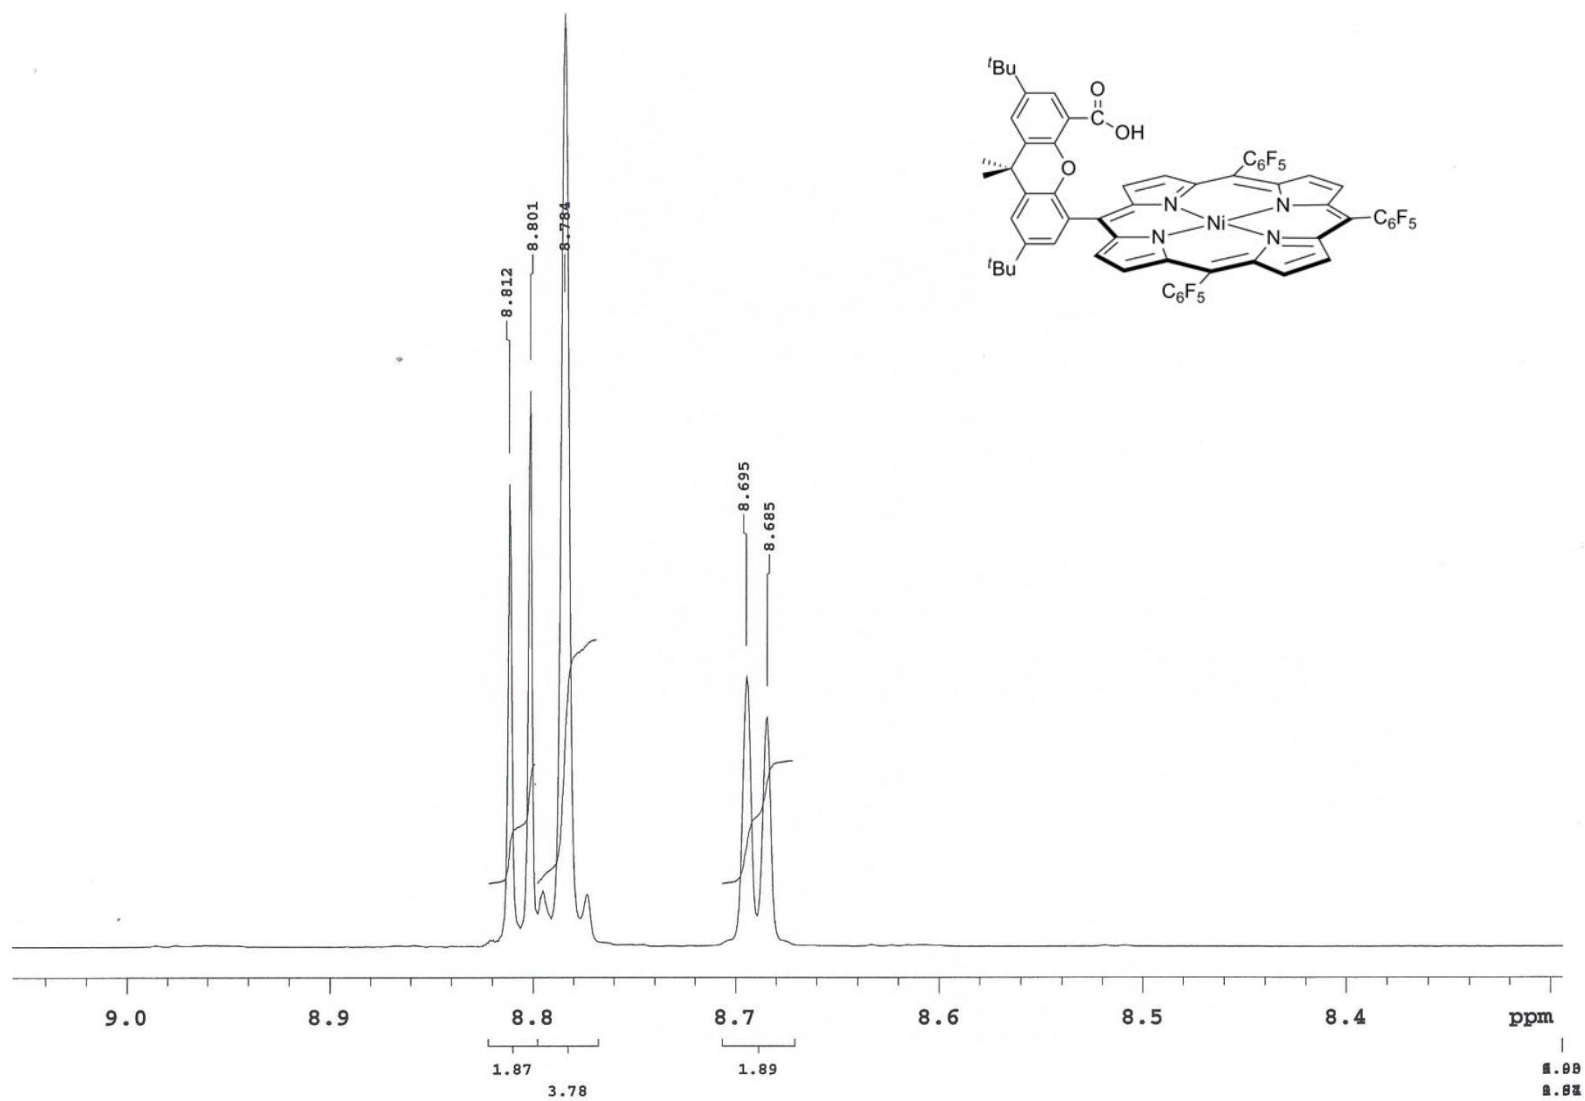

**Figure S4e.** Aromatic region of the  $^1\text{H}$  NMR spectrum of NiHPXCO<sub>2</sub>H (1-Ni) with integrations and chemical shifts.

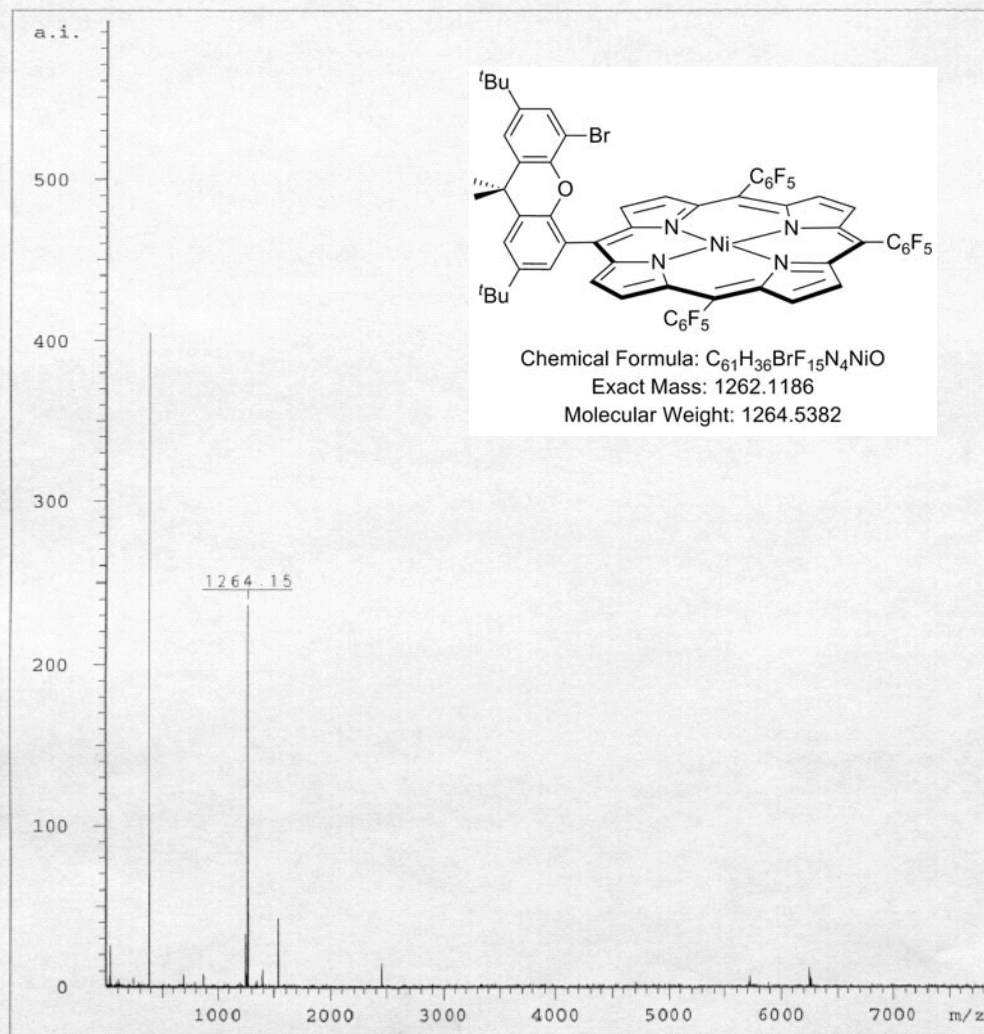

```

INSTRUM GEORGE
OpId TOFUser
SMPNAM NiHPXBr_SI
AQ_DATE 2011-12-28 19:01:33
PATH D:\Data\NOCERA\NCdkip
POLARI POS
AQOP_m Linear
TD 100000
NoSHOTS 200
SMONUM 0
SMOPTS1 0
SMOPTS2 0
SMOPTS3 0
DW 1.00 [ns]
DELAY 313 [ns]
Uis1 19.00 [kV]
Uis2 12.15 [kV]
Uref1 19.70 [kV]
Ulen 9.00 [kV]
Uhimass 0.00 [kV]
RefFull 0.00 [kV]
UdetL 1.65 [kV]
UdetR 1.76 [kV]
Udef1 0.00 [kV]
REPHZ 3.00 [Hz]
ATTEN 39.0
ML1 782601.379
ML2 312.572
ML3 0.000
HITURBO no
GDEON yes
GDEDLY short
DEFLON no
RLNSBND no
LLNSBND no
UIS2BND no
DPCAL1 0.22
DPMASS 400.00 [Da]
RBNDVAL 0.00
LBNDVAL 0.00
IS2BNDV 0.00
CMT1 FLEXControl generated XMASS data
CMT2 (c) 2000 Bruker Daltonics
  
```

Figure S5a. MALDI spectrum of 2-Ni.



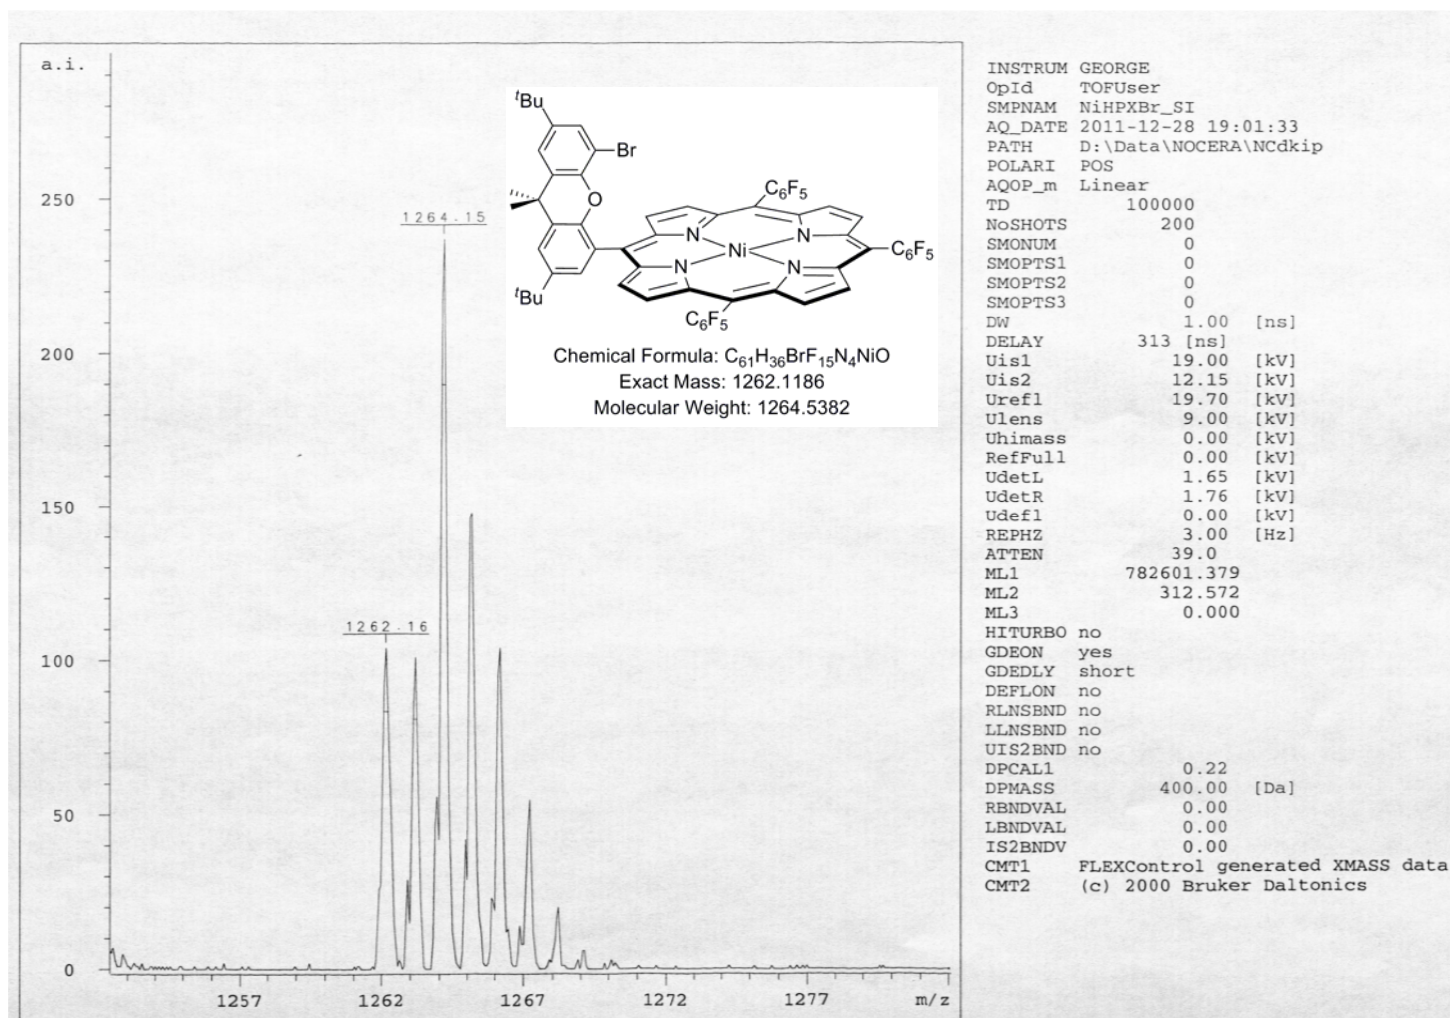

Figure S5b. MALDI spectrum of 2-Ni.

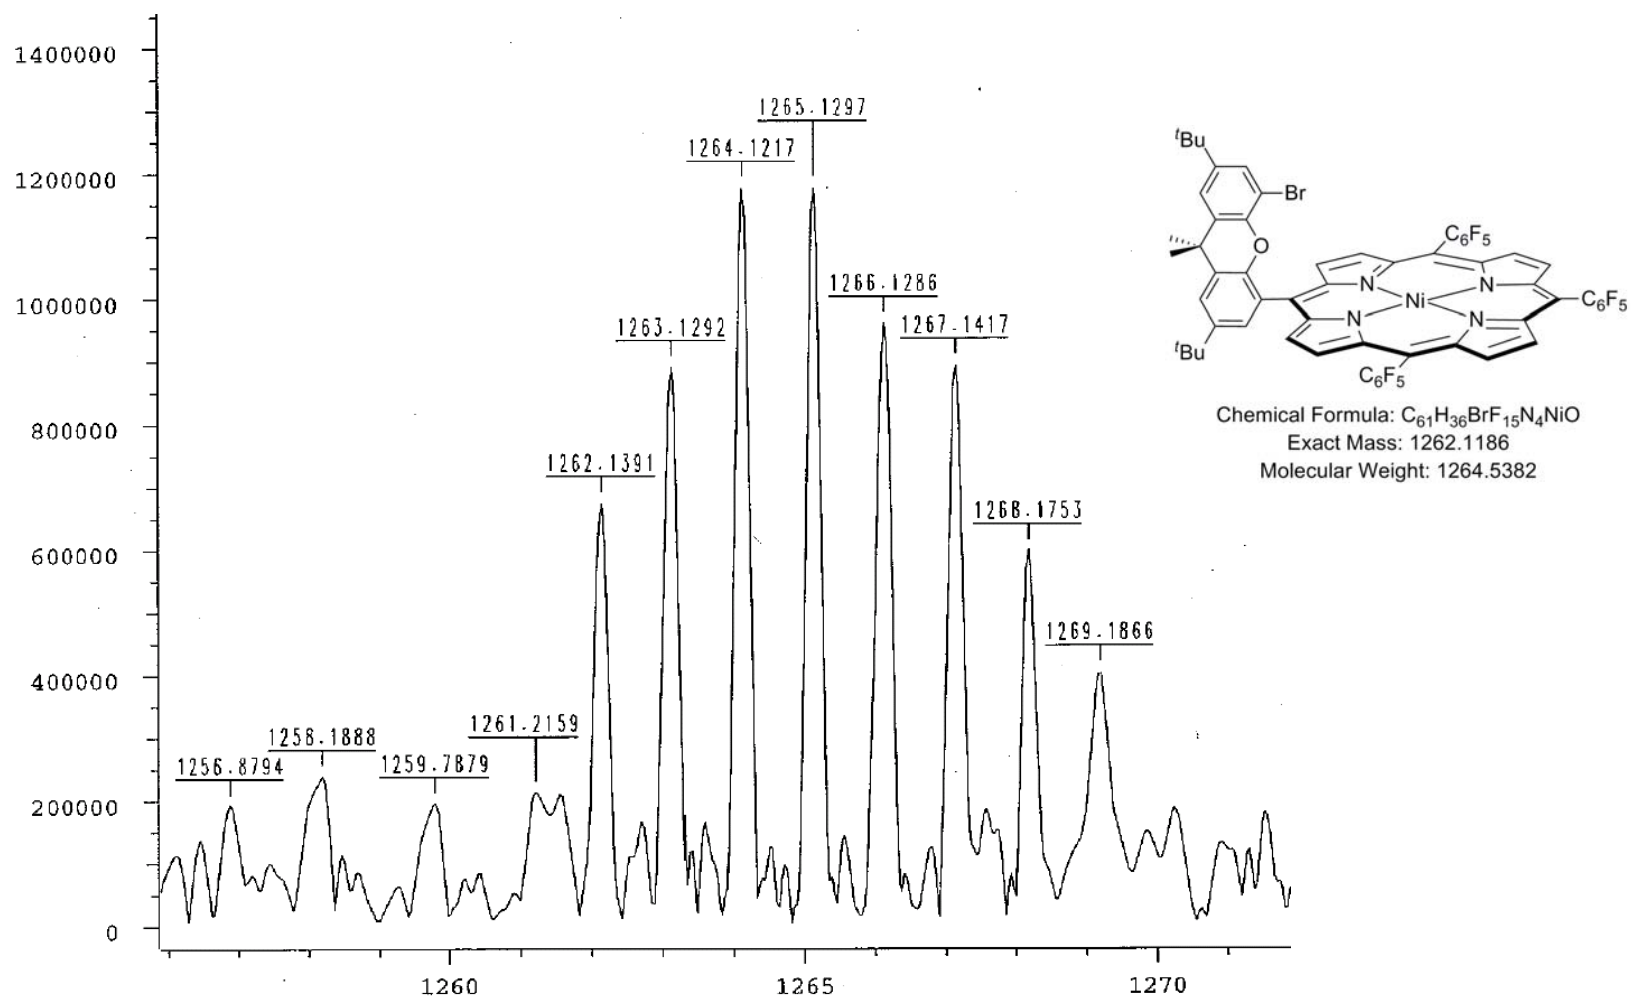

**Figure S5c.** MALDI spectrum of 2-Ni.

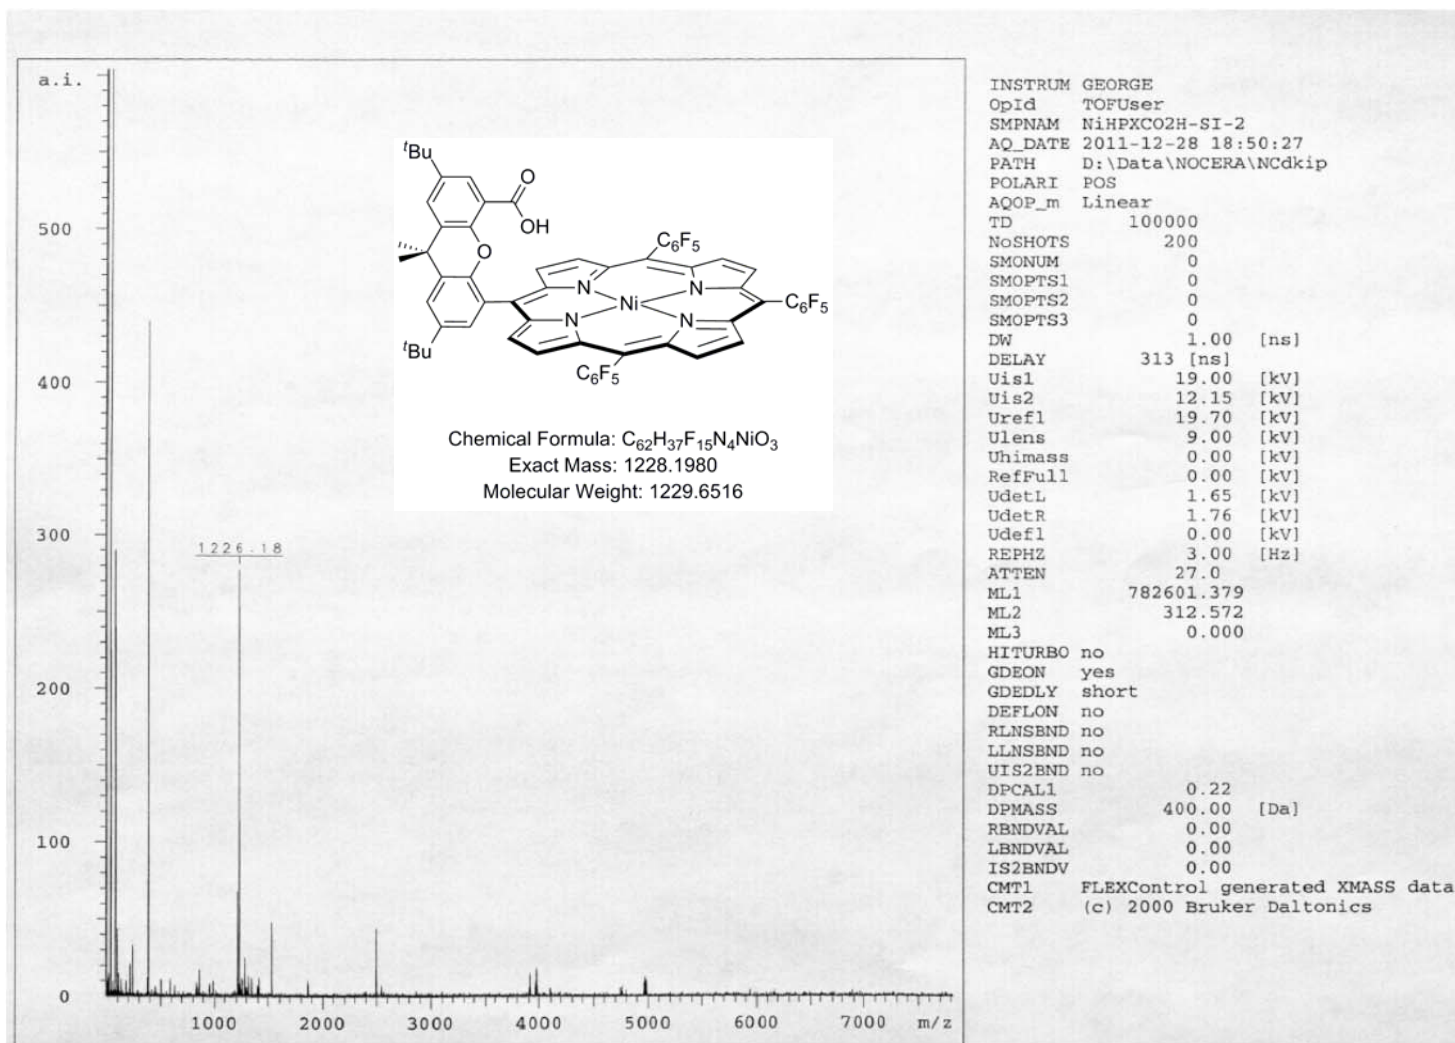

Figure S6a. MALDI spectrum of 1-Ni.

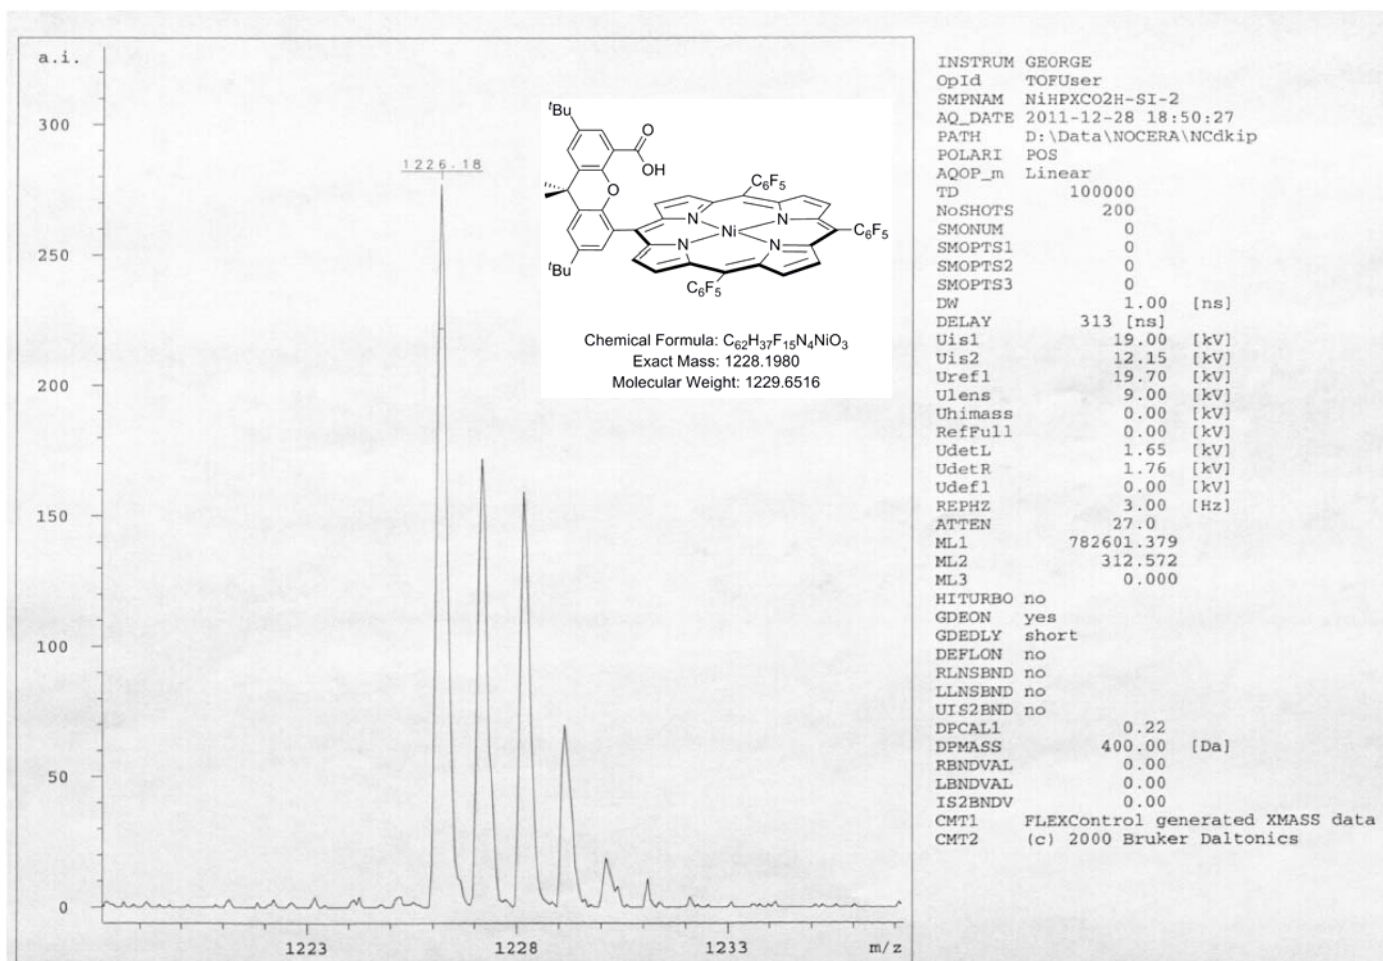

Figure S6b. MALDI spectrum of 1-Ni.

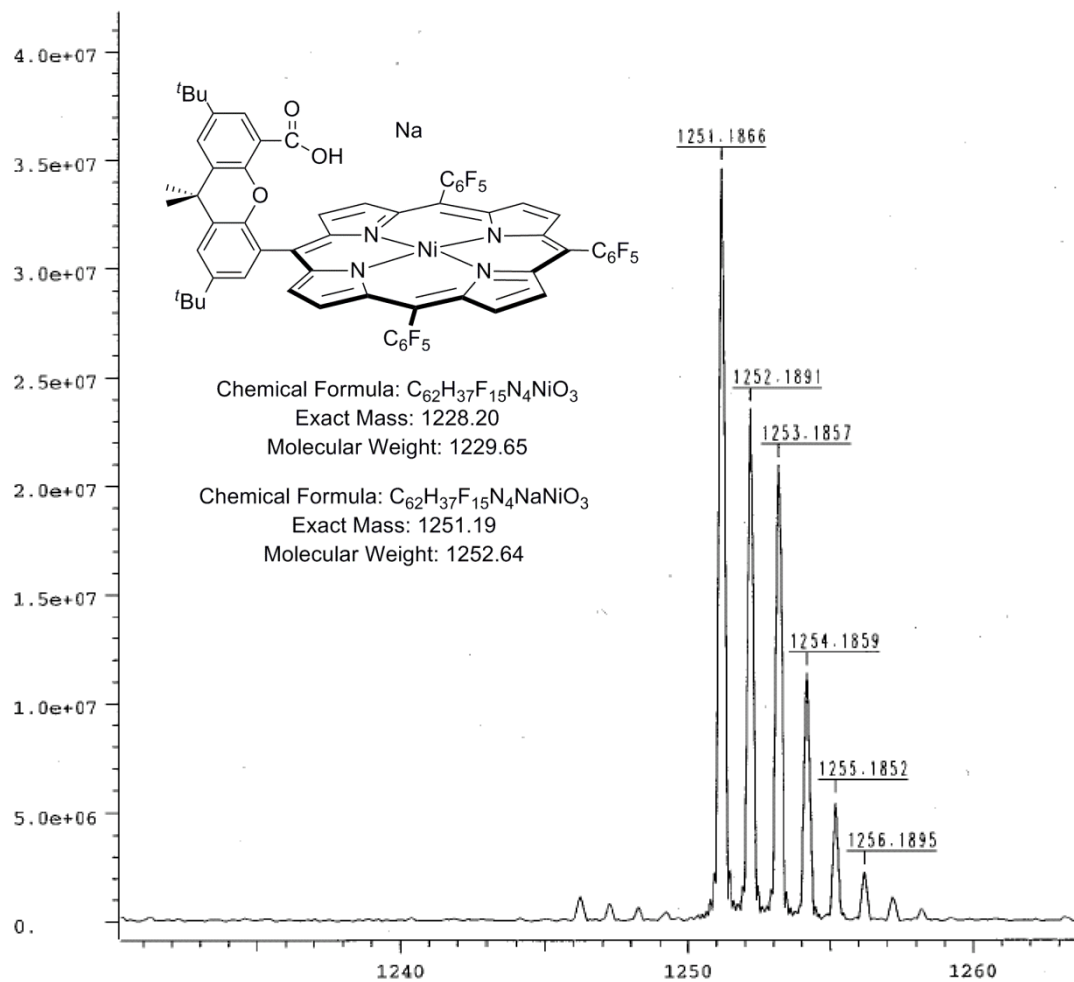

**Figure S6c.** ESI-MS spectrum of **1-Ni**.

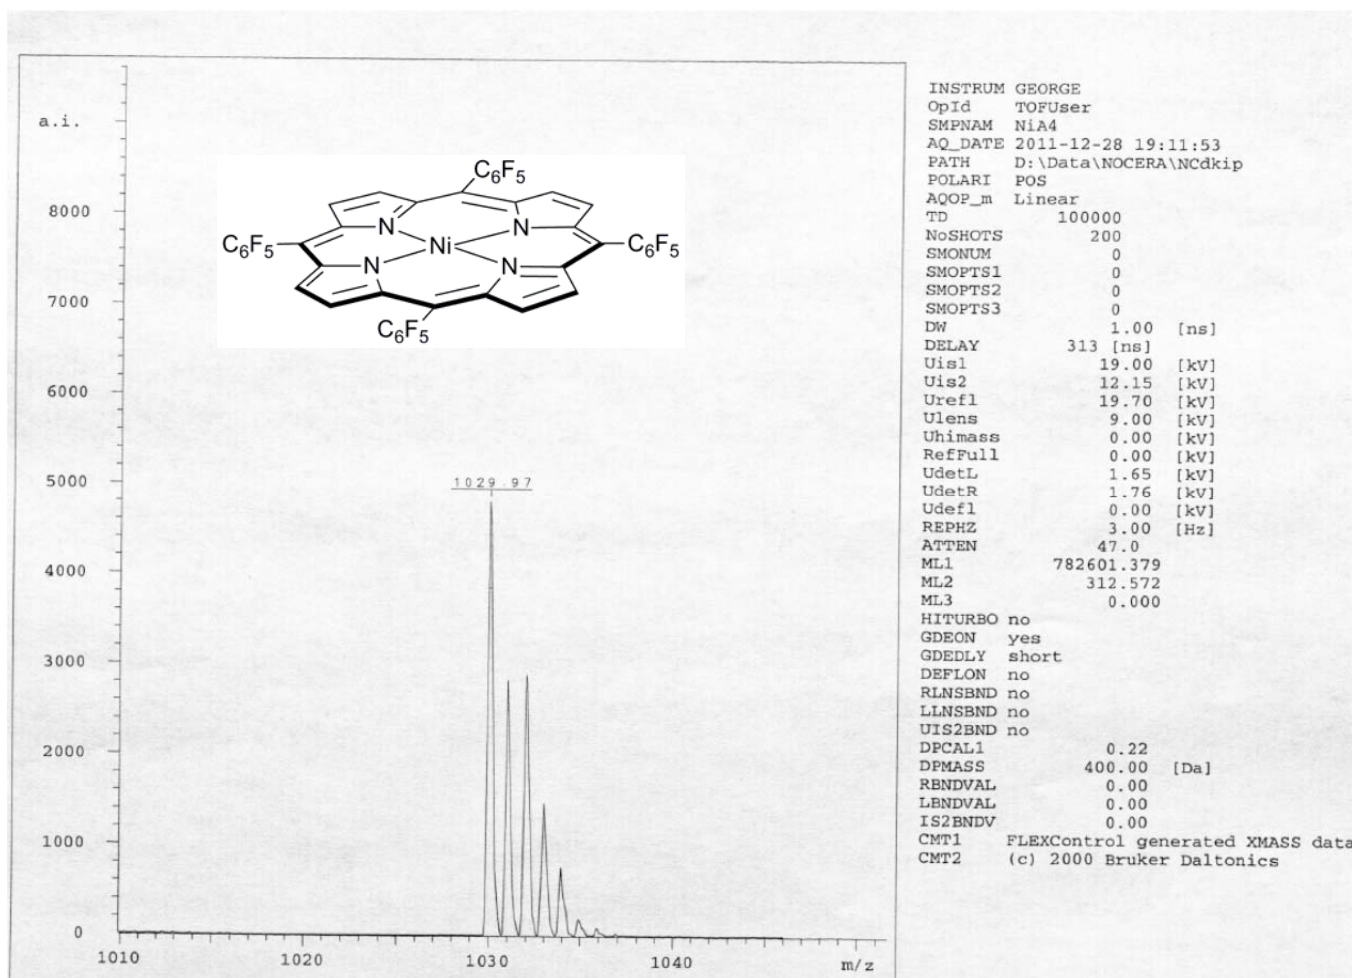

Figure S7. MALDI spectrum of  $\text{Ni}(\text{C}_6\text{F}_5)_4$  (3-Ni).

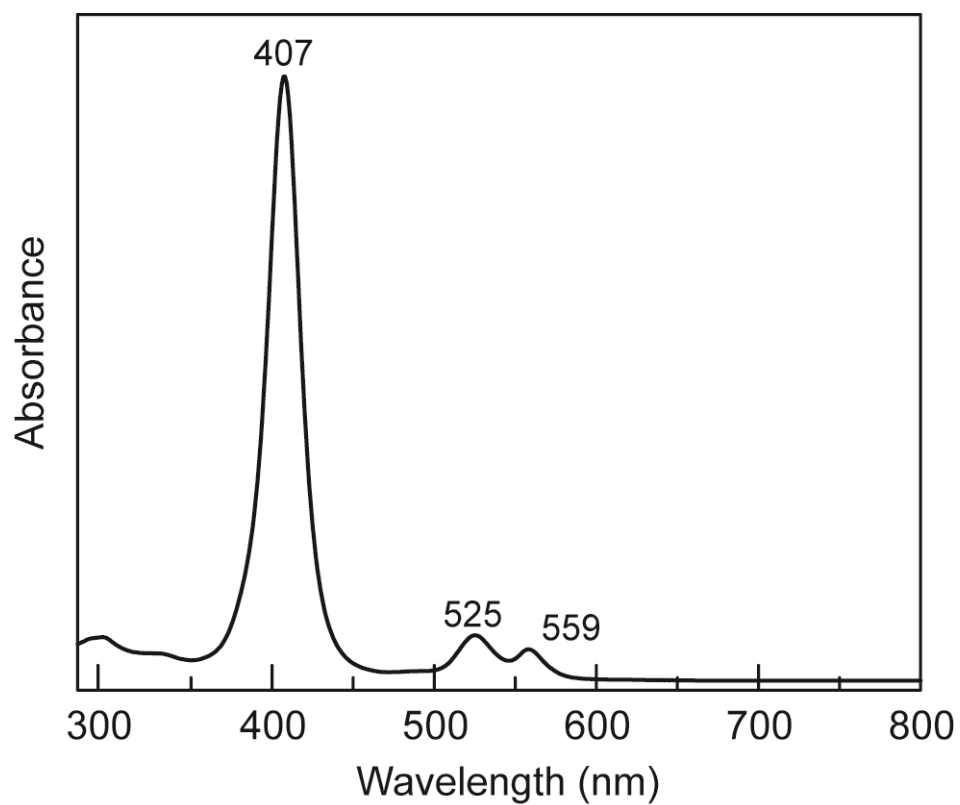

**Figure S8.** Absorption spectrum of **2-Ni** in CH<sub>2</sub>Cl<sub>2</sub> at room temperature.



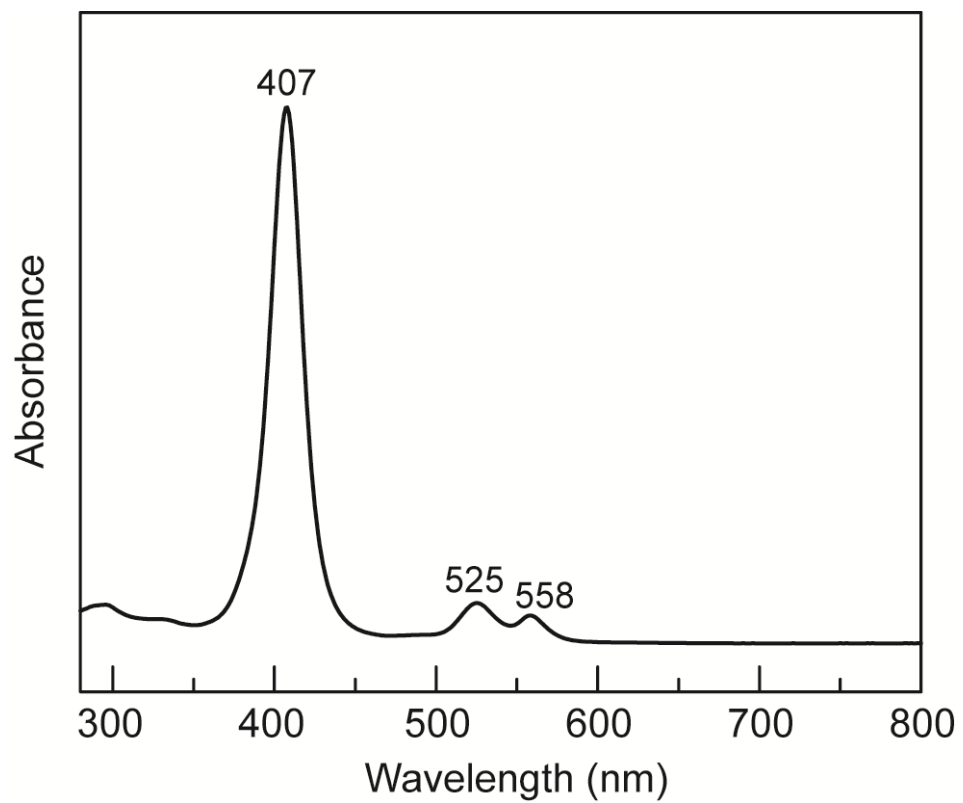

**Figure S9.** Absorption spectrum of 4-Ni in CH<sub>2</sub>Cl<sub>2</sub> at room temperature.



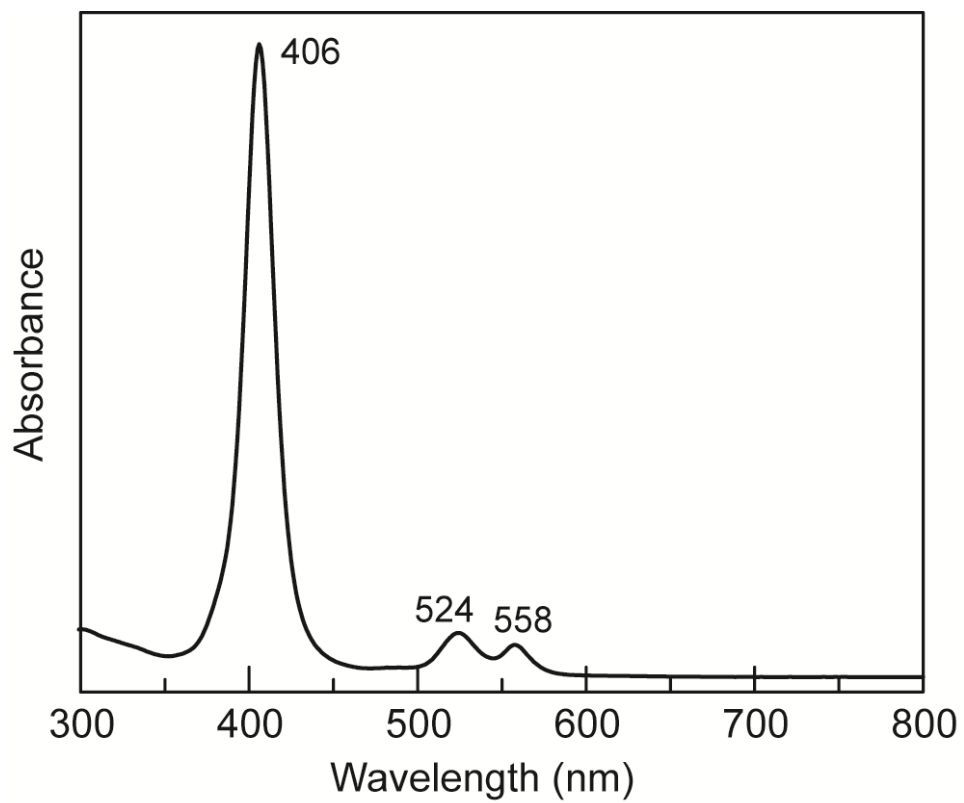

**Figure S10.** Absorption spectrum of **1-Ni** in CH<sub>2</sub>Cl<sub>2</sub> at room temperature.

## Cyclic Voltammetry Data

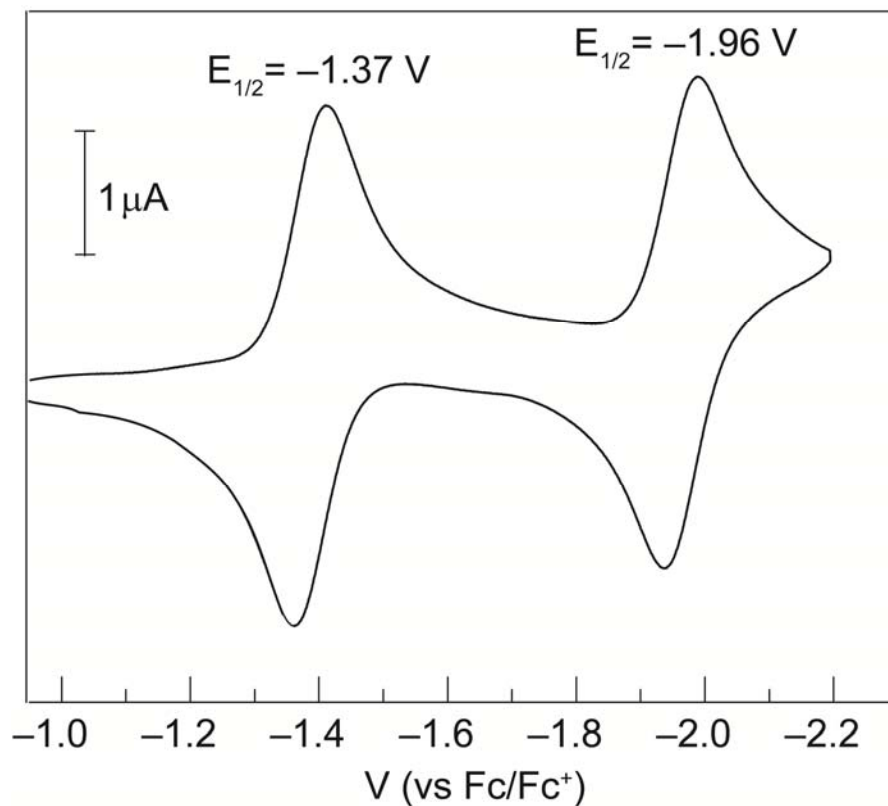

**Figure S11.** CV of **4-Ni** (2 mM) was recorded in 0.2 M NBu<sub>4</sub>PF<sub>6</sub> in acetonitrile in the glove box. A three compartment cell was employed possessing a 0.07 cm<sup>2</sup> glassy carbon button electrode as a working electrode, Pt wire as an auxiliary electrode, and Ag/AgNO as a reference electrode. The CV was collected with scan rate of 30 mV/s with iR compensation.

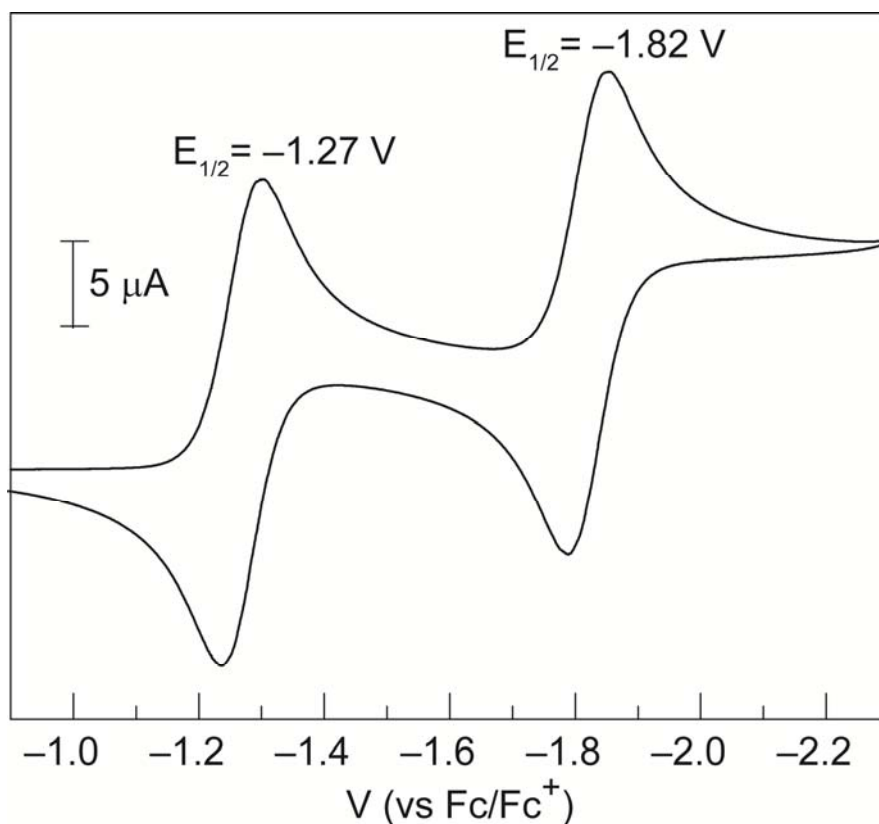

**Figure S12.** CV of **3-Ni** (0.41 mM) was recorded in 0.1 M  $NBu_4PF_6$  in acetonitrile in the glove box. A three compartment cell was employed possessing a  $0.07 \text{ cm}^2$  glassy carbon button electrode as a working electrode, Pt wire as an auxiliary electrode, and  $Ag/AgNO_3$  as a reference electrode. The CV was collected with scan rate of  $100 \text{ mV/s}$  with  $iR$  compensation.

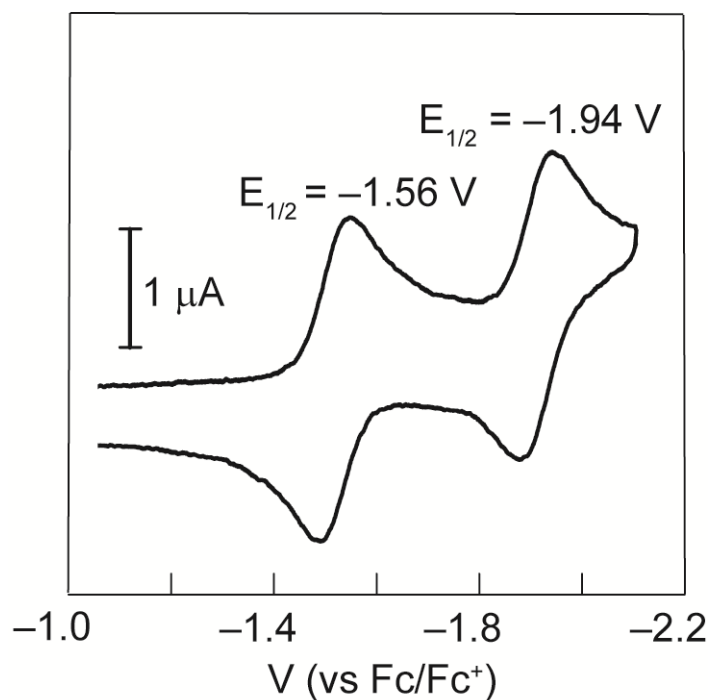

**Figure S13.** The CV of **2-Zn** shows redox waves at  $-1.56$  V and  $-1.94$  V. This confirms that each electrochemical feature of NiHXBr ( $-1.38$  V,  $-1.96$  V), NiHPXCO<sub>2</sub>Me ( $-1.39$  V,  $-1.97$ ), and NiHPXCO<sub>2</sub>H ( $-1.39$  V,  $-2.01$  V) has significant nickel character especially for the first reversible wave. Glassy carbon working electrode ( $0.07$  cm<sup>2</sup>), Ag/AgNO<sub>3</sub> reference electrode, Pt wire, scan rate 100 mV/s, NBu<sub>4</sub>PF<sub>6</sub> electrolyte in acetonitrile.

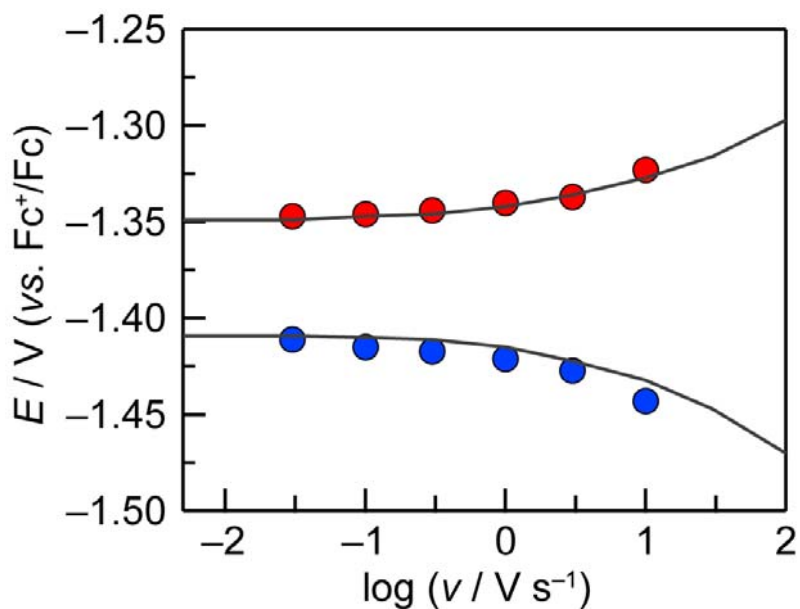

**Figure S14.** Trumpet plot for the **2-Ni**/[**2-Ni**]<sup>-</sup> redox couple ( $E^0 = -1.38$  V vs  $Fc^+/Fc$ ). Cathodic (blue circles) and anodic (red circles) peak potentials as a function of the logarithm of the scan rate ( $v/V s^{-1}$ ). The diffusion coefficient ( $D$ ) of **2-Ni** was determined to be  $8 \times 10^{-6} \text{ cm}^2\text{s}^{-1}$  from the peak current,  $i$ , in the reversible limit:  $i = 0.446 F A C^0 D^{1/2} (Fv/RT)^{1/2}$  ( $F$  is the Faraday constant,  $A$  is the area of the electrode and  $C$  is the bulk **2-Ni** concentration). Solid red lines indicate the variation of peak potential with scan rate simulated for a standard heterogeneous ET rate constant of  $0.05 \text{ cm s}^{-1}$ .

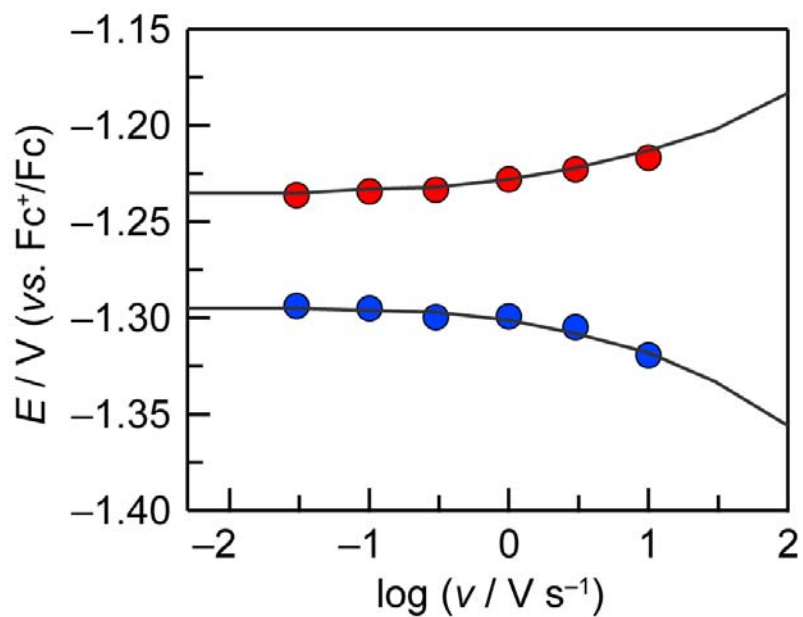

**Figure S15.** Trumpet plot for the  $[2\text{-Ni}]^-/[2\text{-Ni}]^{2-}$  redox couple ( $E^0 = -1.96 \text{ V vs } Fc^+/Fc$ ). Cathodic (blue circles) and anodic (red circles) peak potentials as a function of the logarithm of the scan rate ( $v/V s^{-1}$ ). Solid red lines indicate the variation of peak potential with scan rate simulated for a standard heterogeneous ET rate constant of  $0.05 \text{ cm s}^{-1}$ .

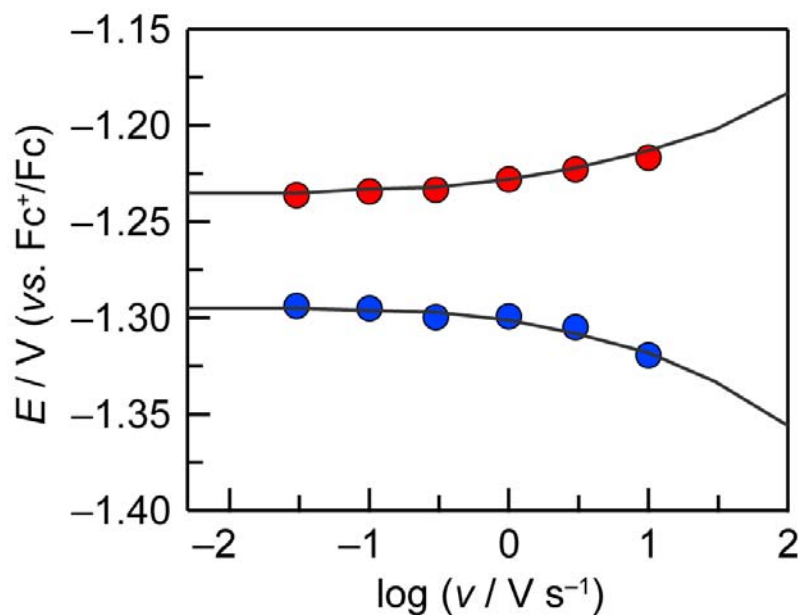

**Figure S16.** Trumpet plot for the **3-Ni**/[**3-Ni**]<sup>-</sup> redox couple ( $E^0 = -1.26$  V vs Fc<sup>+</sup>/Fc). Cathodic (blue circles) and anodic (red circles) peak potentials as a function of the logarithm of the scan rate ( $v/V$  s<sup>-1</sup>). The diffusion coefficient ( $D$ ) of **3-Ni** was determined to be  $8 \times 10^{-6}$  cm<sup>2</sup> s<sup>-1</sup> from the peak current,  $i$ , in the reversible limit. Solid red lines indicate the variation of peak potential with scan rate simulated for a standard heterogeneous ET rate constant of 0.05 cm s<sup>-1</sup>.

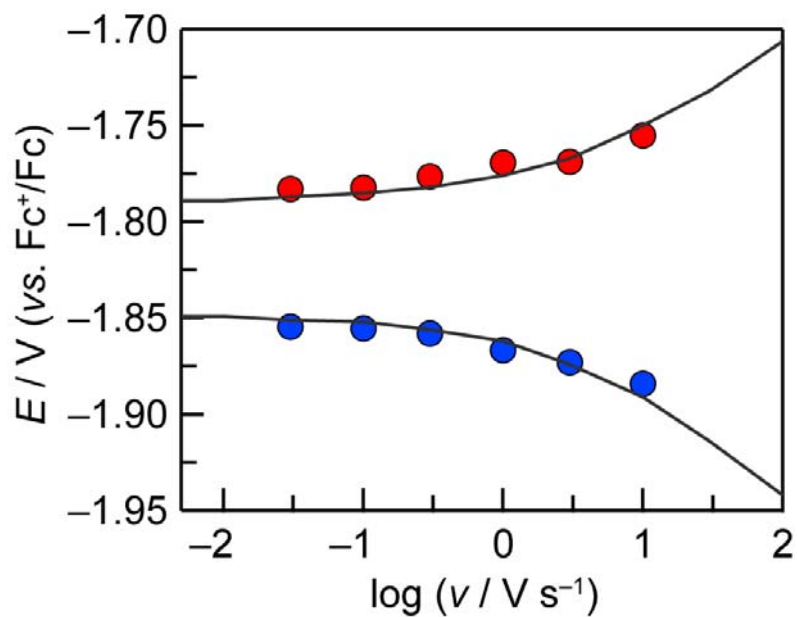

**Figure S17.** Trumpet plot for the **3-Ni/[3-Ni]<sup>-</sup>** redox couple ( $E^0 = -1.82 \text{ V vs } Fc^+/Fc$ ). Cathodic (blue circles) and anodic (red circles) peak potentials as a function of the logarithm of the scan rate ( $v/V s^{-1}$ ). Solid red lines indicate the variation of peak potential with scan rate simulated for a standard heterogeneous ET rate constant of  $0.025 \text{ cm s}^{-1}$ .



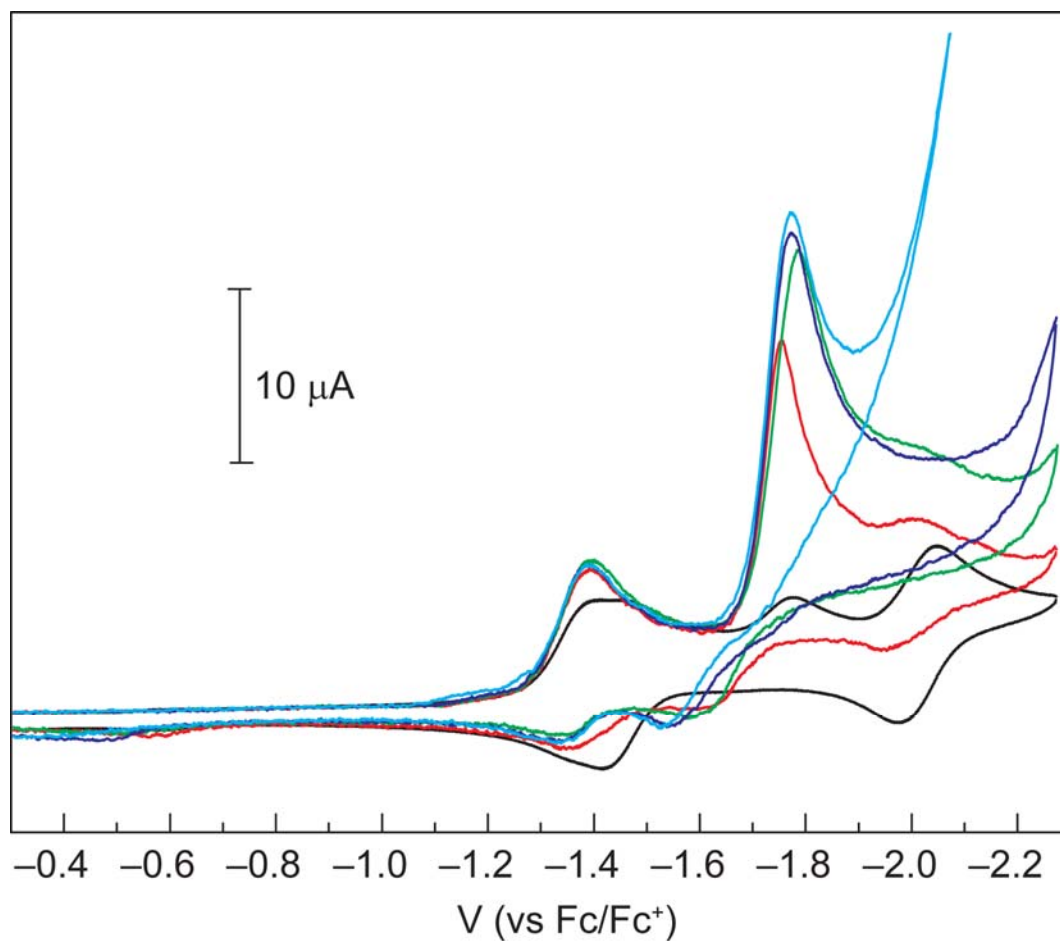

**Figure S18.** CVs of **NiHPXCO<sub>2</sub>H** (0.4 mM) in the presence of 0 (-), 2.0 (-), 5.0 (-), 10.0 (-), 20 (-) mM benzoic acid. The scans were recorded in 0.1 M  $NBu_4PF_6$  in acetonitrile in the glove box. A three compartment cell was employed possessing a  $0.07 \text{ cm}^2$  glassy carbon button electrode as a working electrode, Pt wire as an auxiliary electrode, and  $Ag/AgNO$  as a reference electrode. CV was collected with scan rate of 100 mV/s with iR compensation.

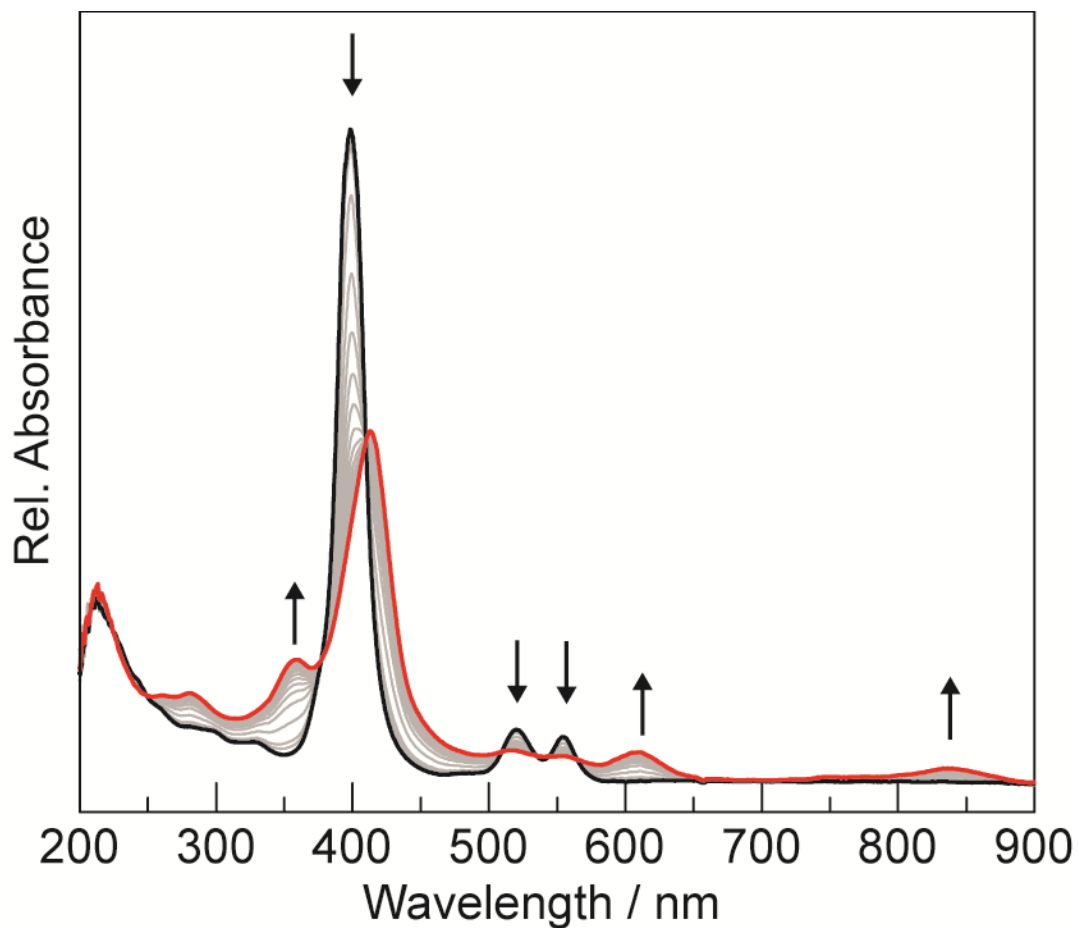

**Figure S19a.** Thin layer spectroelectrochemistry of 0.3 mM NiTFPP in 0.1 M TBAPF<sub>6</sub> in acetonitrile during electrolysis at -1.3 V. Spectra were acquired every 8 sec during electrolysis. Black trace = initial, red trace = final.

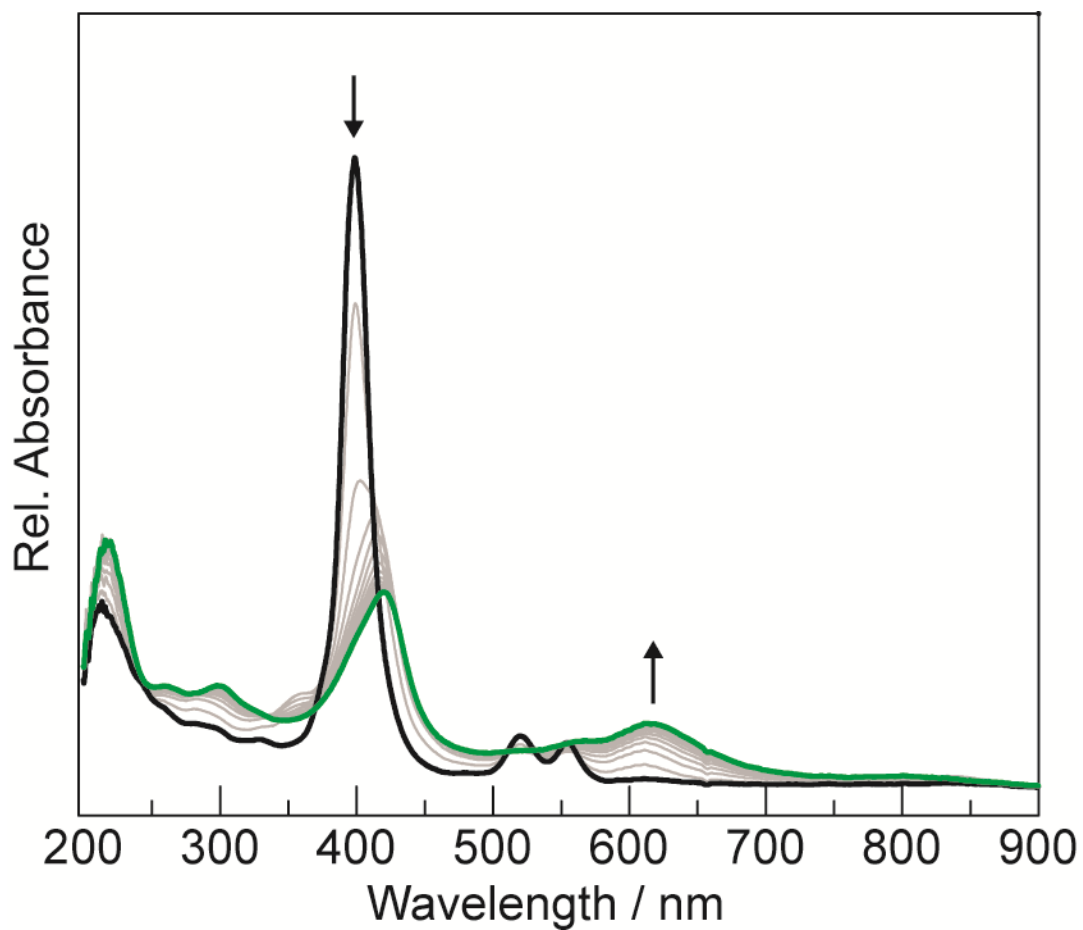

**Figure S19b.** Thin layer spectroelectrochemistry of 0.3 mM NiTFPP in 0.1 M TBAPF<sub>6</sub> in acetonitrile during electrolysis at -1.9 V. Spectra were acquired every 12 sec during electrolysis. Black trace = initial, green trace = final.

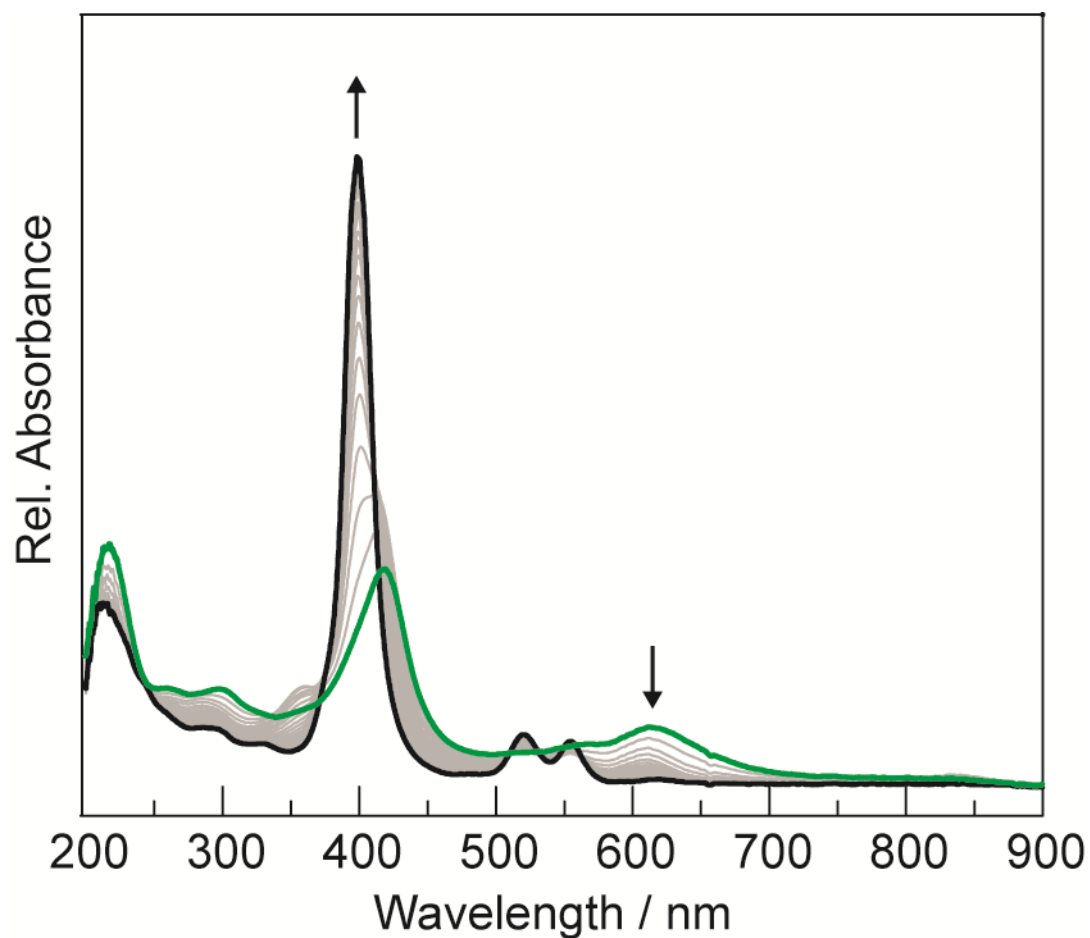

**Figure S19c.** Thin layer spectroelectrochemistry of 0.3 mM NiTFPP in 0.1 M TBAPF<sub>6</sub> in acetonitrile during electrolysis at 0.0 V immediately following electrolysis at -1.9 V. Spectra were acquired every 8 sec. Green trace = initial, black trace = final.

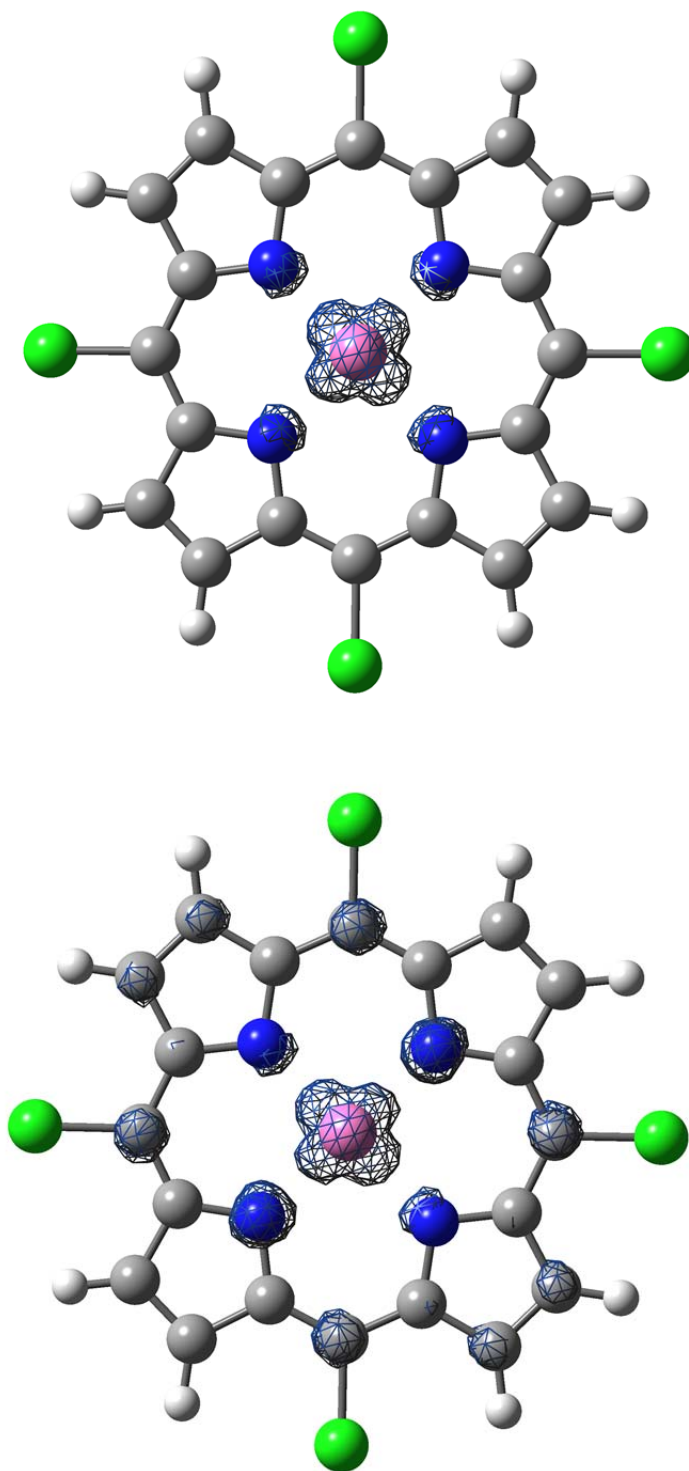

**Figure S20.** Computed Mulliken atomic spin density (B3P86 with geometry optimized in solution, IsoValue: 0.005) plots of  $[3\text{-Ni}]^-$  (top) and  $[3\text{-Ni}]^{2-}$  (bottom). The computed spin density is found to be almost entirely on the metal in the monoanion, top (SD on Ni = 0.936177). In the case of the dianion (bottom), additional spin density from the second electron is localized on the ligands (SD on Ni = 0.963403).

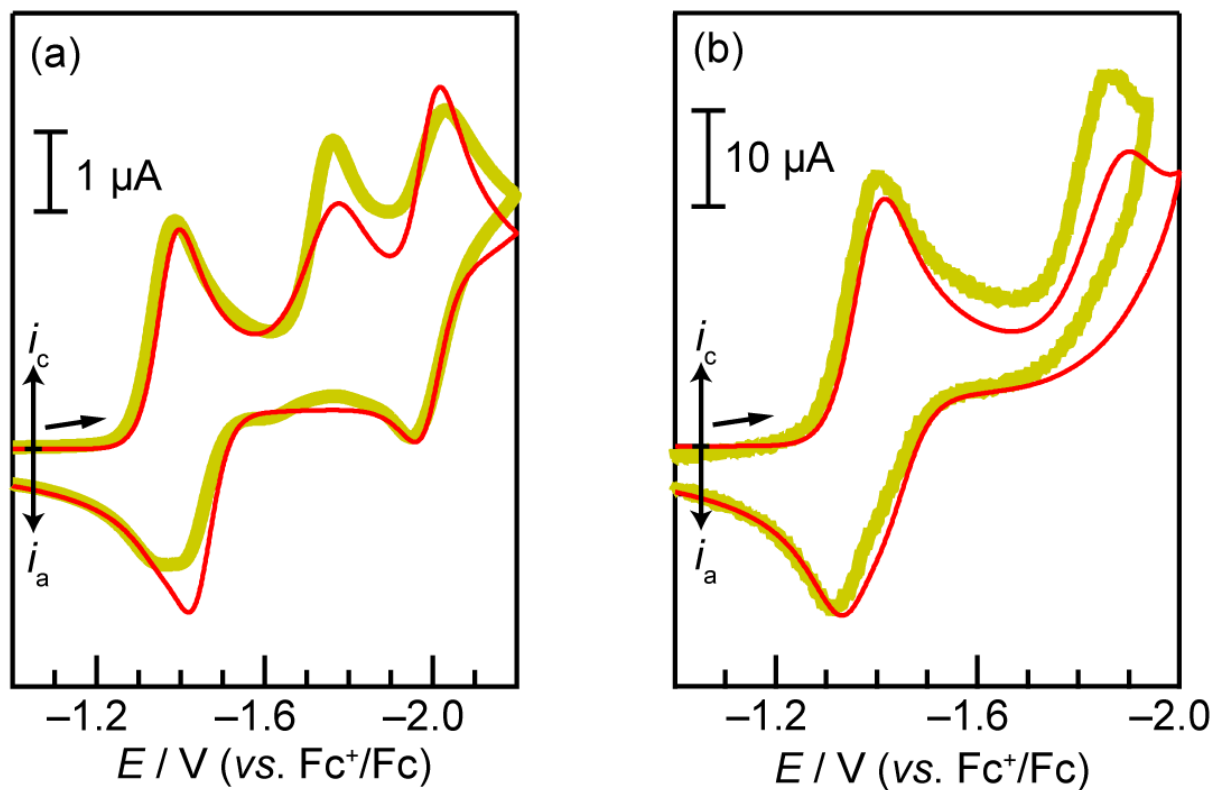

**Figure S21.** Experimental (thick green curves) and simulated (thin red curves) cyclic voltammograms of a 0.4 mM solution of **1-Ni** at a scan rate of (a) 30 mV/s. and (b) 3 V/s. Voltammograms were simulated according to a mechanistic framework consisting of an ETPT pathway (Scheme 2) from  $[\mathbf{1-Ni}]^-$  to  $[\mathbf{1-Ni}_H]^{2-}$ , followed by reduction to  $[\mathbf{1-Ni}_H]^{3-}$ , which is subsequently protonated by the pendant acid group of another porphyrin molecule to liberate  $H_2$ . Parameters used in simulation are tabulated in Table S3.

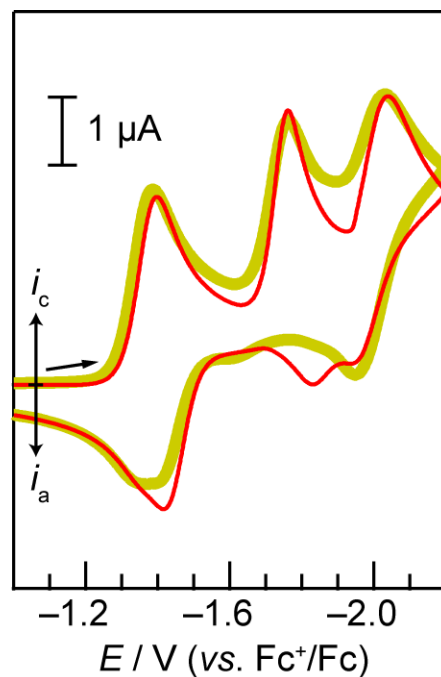

**Figure S22.** Experimental (thick yellow-green curve) and simulated (thin red curve) CVs of a 0.4 mM solution of **1-Ni** at a scan rate of 30 mV/s. The CV was simulated according to a mechanistic framework consisting of an ETPT pathway (Scheme 2) from **1-Ni<sup>-</sup>** to **1-Ni<sub>H</sub><sup>2-</sup>**, followed by reduction to **1-Ni<sub>H</sub><sup>3-</sup>**, which is subsequently protonated by the pendant acid group of another porphyrin molecule to liberate H<sub>2</sub>. Parameters used in simulation are tabulated in Table S4.

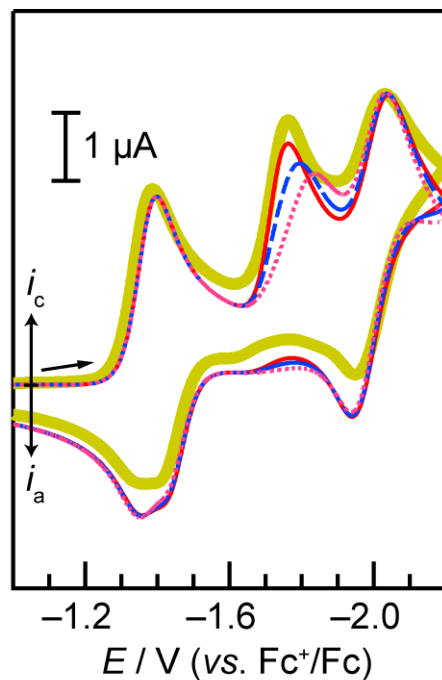

**Figure S23.** Experimental (thick yellow-green curve) and simulated (thin curves) CVs of a 0.4 mM solution of **1-Ni** at a scan rate of 30 mV/s. The CVs were simulated according to a mechanistic framework consisting of a CPET pathway (Scheme 2) from **1-Ni<sup>-</sup>** to **1-Ni<sub>H</sub><sup>2-</sup>** involving a standard CPET rate constant,  $k_{\text{CPET}}$ , of  $6.5 \times 10^{-3}$  cm/s (red, —),  $3.25 \times 10^{-3}$  cm/s (blue, - -), and  $1.5 \times 10^{-3}$  cm/s (pink, ⋯) followed by reduction to **1-Ni<sub>H</sub><sup>3-</sup>**, which is subsequently protonated by the pendant acid group of another porphyrin molecule to liberate H<sub>2</sub>. The other parameters used in simulation are tabulated in Table S5.



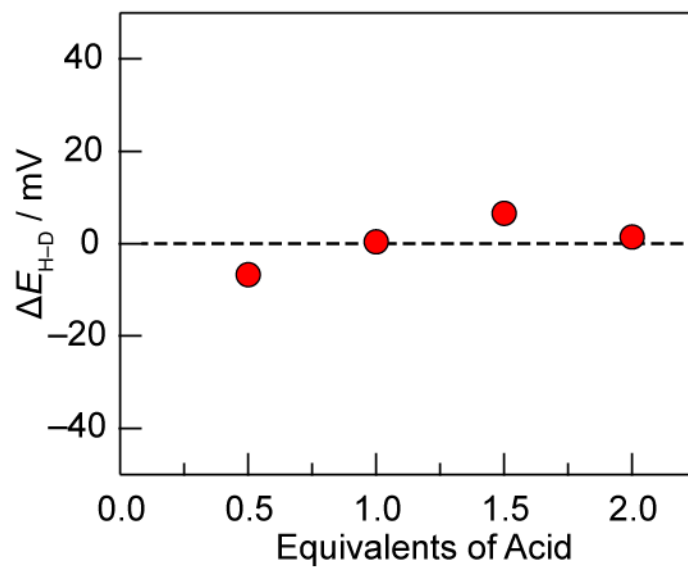

**Figure S24.** Plot of difference in catalytic peak potential between  $C_6H_5COOH$ - and  $C_6H_5COOD$ -titrated **1-Ni** (following treatment with  $K_2CO_3$ ) as a function of the number of acid equivalents introduced.

**Table S1.** Calculated spin density on Ni of [3-Ni]-.

| Functional     | Spin Density                      |                                  |
|----------------|-----------------------------------|----------------------------------|
|                | Gas-Phase Geometries <sup>a</sup> | Solvated Geometries <sup>b</sup> |
| B3P86          | 1.010179                          | 0.936177                         |
| B3LYP          | 1.017783                          | 0.948812                         |
| TPSSh          | 1.060435                          | 0.988065                         |
| $\omega$ B97xD | 0.984440                          | 0.924697                         |
| M06L           | 1.070799                          | 1.017061                         |

<sup>a</sup> Geometry optimizations performed in the *gas* phase. <sup>b</sup> Geometry optimizations performed in solution with C-PCM.

**Table S2.** Calculated relative free energies and spin density (SD) on Ni of [3-Ni]<sup>2-</sup>.

| Functional     | S | Gas-Phase Geometries <sup>a</sup> |          | Solvated Geometries <sup>b</sup> |          |
|----------------|---|-----------------------------------|----------|----------------------------------|----------|
|                |   | Relative Energy<br>(kcal/mol)     | SD on Ni | Relative Energy<br>(kcal/mol)    | SD on Ni |
| B3P86          | 0 | 0.00                              | 0.000000 | 0.00                             | 0.000000 |
|                | 1 | -6.95                             | 1.174651 | -6.68                            | 0.963403 |
| B3LYP          | 0 | 0.00                              | 0.000000 | 0.00                             | 0.000000 |
|                | 1 | -8.36                             | 1.181927 | -7.21                            | 0.978401 |
| BP86           | 0 | 0.00                              | 0.000000 | 0.00                             | 0.000000 |
|                | 1 | -6.65                             | 1.016560 | -6.30                            | 0.931426 |
| BLYP           | 0 | 0.00                              | 0.000000 | 0.00                             | 0.000000 |
|                | 1 | -6.81                             | 1.027134 | -7.22                            | 0.959692 |
| TPSSh          | 0 | 0.00                              | 0.000000 | 0.00                             | 0.000000 |
|                | 1 | -8.00                             | 1.145404 | -7.44                            | 1.016181 |
| $\omega$ B97xD | 0 | 0.00                              | 0.000000 | 0.00                             | 0.000000 |
|                | 1 | -3.71                             | 1.438658 | -3.78                            | 0.990943 |
| M06L           | 0 | 0.00                              | 0.000000 | 0.00                             | 0.000000 |
|                | 1 | -10.42                            | 1.098609 | -10.27                           | 1.036479 |

<sup>a</sup> Geometry optimizations performed in the gas phase. <sup>b</sup> Geometry optimizations performed in solution with C-PCM.

**Table S3.** CV simulation parameters for ETPT mechanisms using experimentally determined [2-Ni]<sup>-</sup>/[2-Ni]<sup>2-</sup> reduction potential as [1-Ni]<sup>-</sup>/[1-Ni]<sup>2-</sup> potential.

Heterogeneous/Electrochemical Reactions:

| Oxidized Species            | Reduced Species             | $E_{sim}^0$ <sup>a</sup> | $k_{ET}^0 / \text{cm s}^{-1}$ |
|-----------------------------|-----------------------------|--------------------------|-------------------------------|
| HOOC--NiP                   | [HOOC--NiP] <sup>-</sup>    | -1.37                    | 0.025 <sup>b</sup>            |
| [HOOC--NiP] <sup>-</sup>    | [HOOC--NiP] <sup>2-</sup>   | -1.96 <sup>c</sup>       | 0.06 <sup>c</sup>             |
| [OOC--NiP] <sup>-</sup>     | [OOC--NiP] <sup>2-</sup>    | -1.45 <sup>d</sup>       | 0.025 <sup>e</sup>            |
| [OOC--NiP] <sup>2-</sup>    | [OOC--NiP] <sup>3-</sup>    | -1.99                    | 0.002 <sup>b</sup>            |
| [OOC--NiP(H)] <sup>2-</sup> | [OOC--NiP(H)] <sup>3-</sup> | -1.4 <sup>b</sup>        | 0.05 <sup>b,e</sup>           |

Homogeneous/Chemical Reactions:

| Reactants                                              | Products                                                      | $K_{eq}$                           | $k_{forward}$           |
|--------------------------------------------------------|---------------------------------------------------------------|------------------------------------|-------------------------|
| [HOOC--NiP] <sup>2-</sup>                              | [OOC--NiP(H)] <sup>2-</sup>                                   | >10 <sup>6</sup>                   | 10 <sup>13</sup>        |
| [OOC--NiP(H)] <sup>2-</sup> + [OOC--NiP] <sup>3-</sup> | [OOC--NiP(H)] <sup>3-</sup> + [OOC--NiP] <sup>2-</sup>        | 9.4 × 10 <sup>7</sup> <sup>f</sup> | $k_{diff}$ <sup>g</sup> |
| [OOC--NiP(H)] <sup>3-</sup> + acid <sup>h</sup>        | H <sub>2</sub> + [OOC--NiP] <sup>2-</sup><br>+ conjugate base | >10 <sup>6</sup>                   | $k_{diff}$ <sup>g</sup> |

<sup>a</sup> Reduction potentials are relative to the reduction potential of Fc<sup>+</sup>. <sup>b</sup> Obtained from simulating experimental CV data. <sup>c</sup> Values estimated from that of non-hangman compound **2-Ni**. <sup>d</sup> Value determined from treatment of **1-Ni** with potassium carbonate, and further refined by simulating shoulder near anodic return peak of **1-Ni**/[**1-Ni**]<sup>-</sup> wave. <sup>e</sup> Value set equal to that obtained from trumpet plots of the corresponding protonated species. <sup>f</sup> These equilibrium constants are governed by the difference in reduction potentials of the two sets of species. <sup>g</sup> The forward rate constants of these downhill reactions are assumed to be the diffusion limited rate constant: 10<sup>10</sup> M<sup>-1</sup> s<sup>-1</sup>, <sup>h</sup> All nickel porphyrins with protonated hanging groups are permitted as acid sources in the model.

**Table S4.** CV simulation parameters for ETPT mechanisms using computed [1-Ni]<sup>-</sup>/[1-Ni]<sup>2-</sup> and [OOC--NiP(H)]<sup>2-</sup>/[OOC--NiP(H)]<sup>3-</sup> reduction potentials.

Heterogeneous/Electrochemical Reactions:<sup>a</sup>

| Oxidized Species            | Reduced Species             | $E_{sim}^0$ <sup>a</sup> | $k_{ET}^0 / \text{cm s}^{-1}$ |
|-----------------------------|-----------------------------|--------------------------|-------------------------------|
| HOOC--NiP                   | [HOOC--NiP] <sup>-</sup>    | -1.37                    | 0.025 <sup>b</sup>            |
| [HOOC--NiP] <sup>-</sup>    | [HOOC--NiP] <sup>2-</sup>   | -1.85 <sup>c</sup>       | 0.06 <sup>c</sup>             |
| [OOC--NiP] <sup>-</sup>     | [OOC--NiP] <sup>2-</sup>    | -1.45 <sup>d</sup>       | 0.025 <sup>e</sup>            |
| [OOC--NiP] <sup>2-</sup>    | [OOC--NiP] <sup>3-</sup>    | -1.99                    | 0.002 <sup>b</sup>            |
| [OOC--NiP(H)] <sup>2-</sup> | [OOC--NiP(H)] <sup>3-</sup> | -1.84 <sup>b</sup>       | 0.05 <sup>b,e</sup>           |

Homogeneous/Chemical Reactions:

| Reactants                                              | Products                                                      | $K_{eq}$                           | $k_{forward}$           |
|--------------------------------------------------------|---------------------------------------------------------------|------------------------------------|-------------------------|
| [HOOC--NiP] <sup>2-</sup>                              | [OOC--NiP(H)] <sup>2-</sup>                                   | >10 <sup>6</sup>                   | 2000 <sup>b</sup>       |
| [OOC--NiP(H)] <sup>2-</sup> + [OOC--NiP] <sup>3-</sup> | [OOC--NiP(H)] <sup>3-</sup> + [OOC--NiP] <sup>2-</sup>        | 9.4 × 10 <sup>7</sup> <sup>f</sup> | $k_{diff}$ <sup>g</sup> |
| [OOC--NiP(H)] <sup>3-</sup> + acid <sup>h</sup>        | H <sub>2</sub> + [OOC--NiP] <sup>2-</sup><br>+ conjugate base | >10 <sup>6</sup>                   | $k_{diff}$ <sup>g</sup> |

<sup>a</sup> Reduction potentials are relative to the reduction potential of Fc<sup>+</sup>. <sup>b</sup> Obtained from simulating experimental CV data. <sup>c</sup> Value computed using DFT (Table 1). <sup>d</sup> Value estimated from that of non-hangman compound 2-Ni. <sup>e</sup> Value determined from treatment of 1-Ni with potassium carbonate, and further refined by simulating shoulder near anodic return peak of 1-Ni/[1-Ni]<sup>-</sup> wave. <sup>f</sup> Value set equal to that obtained from trumpet plots of the corresponding protonated species. <sup>g</sup> These equilibrium constants are governed by the difference in reduction potentials of the two sets of species. <sup>h</sup> The forward rate constants of these downhill reactions are assumed to be the diffusion limited rate constant: 10<sup>10</sup> M<sup>-1</sup> s<sup>-1</sup>, <sup>h</sup> All nickel porphyrins with protonated hanging groups are permitted as acid sources in the model.

**Table S5.** Parameters used in simulating CPET-based pathway*Heterogeneous/Electrochemical Reactions:*

| Oxidized Species            | Reduced Species             | $E_{\text{sim}}^{\circ}$ <sup>a</sup> | $k_{\text{ET}}^{\circ}$ / cm s <sup>-1</sup> |
|-----------------------------|-----------------------------|---------------------------------------|----------------------------------------------|
| HOOC--NiP                   | [HOOC--NiP] <sup>-</sup>    | -1.37                                 | 0.025 <sup>b</sup>                           |
| [HOOC--NiP] <sup>-</sup>    | [HOOC--NiP] <sup>2-</sup>   | -1.96 <sup>c</sup>                    | 0.06 <sup>c</sup>                            |
| [OOC--NiP] <sup>-</sup>     | [OOC--NiP] <sup>2-</sup>    | -1.45 <sup>d</sup>                    | 0.025 <sup>e</sup>                           |
| [OOC--NiP] <sup>2-</sup>    | [OOC--NiP] <sup>3-</sup>    | -1.99                                 | 0.002 <sup>b</sup>                           |
| [HOOC--NiP] <sup>-</sup>    | [OOC--Ni(H)P] <sup>2-</sup> | -1.83 <sup>b</sup>                    | $k_{\text{CPET}}^*$                          |
| [OOC--Ni(H)P] <sup>2-</sup> | [OOC--Ni(H)P] <sup>3-</sup> | -1.95 <sup>b</sup>                    | 0.05 <sup>b</sup>                            |

*Homogeneous/Chemical Reactions:*

| Reactants                                              | Products                                                    | $K_{\text{eq}}$   | $k_{\text{forward}}$ |
|--------------------------------------------------------|-------------------------------------------------------------|-------------------|----------------------|
| [OOC--NiP(H)] <sup>2-</sup> + [OOC--NiP] <sup>3-</sup> | [OOC--NiP(H)] <sup>3-</sup> + [OOC--NiP] <sup>2-</sup>      | 4.74 <sup>f</sup> | $k_{\text{diff}}^g$  |
| [OOC--NiP(H)] <sup>3-</sup> + acid <sup>h</sup>        | H <sub>2</sub> + [OOC-NiP] <sup>2-</sup> -conjugate<br>base | > 10 <sup>5</sup> | $k_{\text{diff}}^g$  |

<sup>a</sup> Reduction potentials are relative to the reduction potential of Fc/Fc<sup>+</sup>. <sup>b</sup> Obtained from simulating experimental CV data. <sup>c</sup> Values estimated from that of non-hangman compound **2-Ni**. <sup>d</sup> Value determined from treatment of **1-Ni** with potassium carbonate, and further refined by simulating shoulder near anodic return peak of **1-Ni/1-Ni<sup>-1</sup>** wave. <sup>e</sup> Value set equal to that obtained from trumpet plots of the corresponding protonated species. <sup>f</sup> These equilibrium constants are governed by the difference in reduction potentials of the two sets of species. <sup>g</sup> The forward rate constants of these downhill reactions are assumed to be the diffusion limited rate constant: 10<sup>10</sup> M<sup>-1</sup> s<sup>-1</sup>. <sup>h</sup> All nickel porphyrins with protonated hanging groups are permitted as acid sources in the mechanism.

\*See the caption of Figure S23 for the standard CPET rate constant used in simulation.

**Table S6.** Relative free energies and spin density (SD) on Ni of **[1-Ni]** (B3P86 functional).

| Complex                                        | <i>S</i> | Gas Phase Geometries <sup>a</sup> |                       | Solvated Geometries <sup>b</sup> |                       |
|------------------------------------------------|----------|-----------------------------------|-----------------------|----------------------------------|-----------------------|
|                                                |          | Relative Energy                   | SD on Ni              | Relative Energy                  | SD on Ni              |
| [HOOC--<br>NiP] <sup>2-</sup>                  | 0        | 0.00 kcal/mol                     | 0.000000              | 0.00 kcal/mol                    | 0.000000              |
|                                                | 1        | -7.08 kcal/mol                    | 1.201218              | -5.51 kcal/mol                   | 1.016012              |
| [OOC--<br>Ni <sup>II</sup> (H)P] <sup>2-</sup> | 0        | 29.24 kcal/mol                    | 0.000000              | 28.02 kcal/mol                   | 0.000000              |
|                                                | 1        | 1.99 kcal/mol                     | 1.940001 <sup>c</sup> | -0.10 kcal/mol                   | 1.904485 <sup>c</sup> |
| [OOC--<br>(H)P] <sup>3-</sup>                  | 1/2      | 0.00 kcal/mol                     | 1.975188 <sup>c</sup> | 0.00 kcal/mol                    | 1.897547 <sup>c</sup> |
|                                                | 3/2      | -1.21 kcal/mol                    | 1.976108 <sup>c</sup> | -1.54 kcal/mol                   | 1.888403 <sup>c</sup> |

<sup>a</sup> Geometry optimizations performed in the gas phase. <sup>b</sup> Geometry optimizations performed in solution with C-PCM. <sup>c</sup> These spin densities include contributions from the hydride nucleus.

**Table S7.** Coordinates and energies for complexes optimized in solution with B3P86.**HOOC--NiP (S=0)**

|   |                 |                 |                 |
|---|-----------------|-----------------|-----------------|
| N | 13.683005425905 | 24.505636854170 | -3.539665288299 |
| N | 17.122317399133 | 26.193680363235 | -3.895302497585 |
| N | 14.730349889813 | 26.911163581865 | -2.837552045958 |
| O | 15.579112842484 | 30.432727872222 | -5.191545601269 |
| C | 16.519318309743 | 28.514898022299 | -3.365056199637 |
| C | 17.412506129831 | 27.533645306162 | -3.783801184413 |
| C | 18.809574915195 | 27.771358483903 | -4.014412272358 |
| H | 19.280720474234 | 28.743083604456 | -3.997573241700 |
| C | 19.389546935918 | 26.557327036087 | -4.201242769729 |
| H | 20.429092142566 | 26.333084441848 | -4.388589963367 |
| C | 18.330194549112 | 25.591422375199 | -4.163878741918 |
| C | 18.465585774195 | 24.254221428070 | -4.503708692553 |
| C | 17.392428805059 | 23.427627628799 | -4.807190938974 |
| C | 17.489960502103 | 22.174809661595 | -5.495279720060 |
| H | 18.412345357405 | 21.679294972997 | -5.759108867730 |
| C | 16.217739694700 | 21.784370233540 | -5.771594983285 |
| H | 15.891049548645 | 20.897660929109 | -6.293790358699 |
| C | 15.353323198859 | 22.767986227850 | -5.191099760818 |
| C | 13.974365129797 | 22.653872053073 | -5.093741187531 |
| C | 13.197824921257 | 23.427172413283 | -4.243235122988 |
| C | 11.850792427588 | 23.126566522815 | -3.859673343346 |
| H | 11.248423516502 | 22.332039961033 | -4.273960672975 |
| C | 11.528260866136 | 23.994333908286 | -2.864148209076 |
| H | 10.603390875563 | 24.064055131922 | -2.311568103414 |
| C | 12.657177463509 | 24.860037462887 | -2.695899272404 |
| C | 12.672666485895 | 26.001604351131 | -1.906358302574 |
| C | 13.613757636087 | 27.009716404752 | -2.038804629012 |
| C | 13.470349486835 | 28.337916333178 | -1.517279609866 |
| H | 12.676264582721 | 28.667070426476 | -0.863731707217 |



|   |                 |                 |                  |
|---|-----------------|-----------------|------------------|
| C | 14.480372509497 | 29.070921343049 | -2.053074552405  |
| H | 14.698473410265 | 30.119036048967 | -1.908141730579  |
| C | 15.278054498491 | 28.170606086327 | -2.837335071443  |
| C | 15.349291973529 | 30.380711345765 | -7.571980397358  |
| C | 15.981019555617 | 33.094067053686 | -7.665758989379  |
| H | 16.221903382592 | 34.150888238384 | -7.711512738452  |
| C | 15.909707879340 | 32.465839825427 | -6.422082969077  |
| C | 16.065973370962 | 33.185155897740 | -5.089716372170  |
| C | 16.783401108463 | 32.231529151491 | -4.145255808732  |
| C | 15.614009980811 | 31.103043403385 | -6.397955632391  |
| C | 15.020171164436 | 28.930752130010 | -7.620694381219  |
| C | 16.448785517974 | 30.880396145675 | -4.205998103772  |
| C | 16.949296962802 | 29.937555236914 | -3.305735421411  |
| C | 17.696980644544 | 32.627831904160 | -3.167201958822  |
| H | 17.985729123121 | 33.671462314686 | -3.096257739505  |
| O | 15.042735748312 | 28.231635190452 | -6.484131028262  |
| H | 15.284948056469 | 28.813621395438 | -5.730816768146  |
| N | 16.079003057494 | 23.782834088428 | -4.610574944963  |
| O | 14.735439642478 | 28.359582600198 | -8.662762016415  |
| C | 15.411615191192 | 31.060369956215 | -8.792907147595  |
| H | 15.200930200541 | 30.498245639647 | -9.696572853999  |
| C | 17.852400175128 | 30.380811699059 | -2.336612001497  |
| H | 18.250336691171 | 29.660214382849 | -1.628255405962  |
| C | 18.249464139786 | 31.718365469547 | -2.260736710955  |
| C | 15.741275484386 | 32.411140618708 | -8.863405694533  |
| C | 19.247759713049 | 32.169066965042 | -1.230923766867  |
| H | 20.265094156002 | 31.876760170548 | -1.513898266671  |
| H | 19.233696508431 | 33.255933576426 | -1.120634007073  |
| H | 19.041583634382 | 31.719644047178 | -0.255383475324  |
| C | 15.841302858033 | 33.115542151504 | -10.187128072791 |
| H | 16.685457706349 | 32.734645923401 | -10.771476099873 |
| H | 14.938210787284 | 32.963964828734 | -10.785664675001 |

|    |                 |                 |                  |
|----|-----------------|-----------------|------------------|
| H  | 15.984974107336 | 34.189499671304 | -10.048674498460 |
| C  | 16.787425291773 | 34.522088575595 | -5.226315504032  |
| H  | 17.798696227671 | 34.402566218646 | -5.625476399513  |
| H  | 16.230779972357 | 35.191556658776 | -5.886696564136  |
| H  | 16.852801000598 | 35.017023297582 | -4.254718435866  |
| C  | 14.651749345763 | 33.437162737474 | -4.518799566505  |
| H  | 14.725195850862 | 33.911216195980 | -3.535428176858  |
| H  | 14.090218128964 | 34.097423776549 | -5.186481961604  |
| H  | 14.100565647827 | 32.498936012770 | -4.410553298259  |
| Cl | 13.198362056630 | 21.368416925949 | -5.967781891360  |
| Cl | 11.350960757554 | 26.250414624993 | -0.806013818721  |
| Cl | 20.070422882027 | 23.622956264586 | -4.722413498083  |
| Ni | 15.403905580916 | 25.348969878509 | -3.721801465203  |

E = -4803.77362761 Hartrees

**[HOOC--NiP]- (S=1/2)**

|   |                 |                 |                 |
|---|-----------------|-----------------|-----------------|
| N | 13.672806196421 | 24.164857012894 | -3.107581255637 |
| N | 16.866731513189 | 26.274595453135 | -4.395632504625 |
| N | 14.477571528676 | 26.903898742506 | -2.967258425804 |
| O | 15.636796093458 | 30.566459069068 | -5.358924884724 |
| C | 16.262157989034 | 28.505803763325 | -3.538279277589 |
| C | 17.102083012694 | 27.615521499021 | -4.215538180948 |
| C | 18.356331793909 | 27.997969209577 | -4.818630960548 |
| H | 18.767724106722 | 28.997460438251 | -4.820286749507 |
| C | 18.886973441236 | 26.873719637777 | -5.368592622273 |
| H | 19.818402658386 | 26.769692124665 | -5.905493961778 |
| C | 17.956248782883 | 25.807830031033 | -5.090777912073 |
| C | 18.122780990646 | 24.474776576472 | -5.463548901146 |
| C | 17.259207909084 | 23.406821937254 | -5.210028459341 |
| C | 17.479162695624 | 22.042567023967 | -5.615515995297 |
| H | 18.336556441565 | 21.678851846921 | -6.162641445465 |
| C | 16.405165116526 | 21.330774573044 | -5.180426683486 |

|   |                 |                 |                 |
|---|-----------------|-----------------|-----------------|
| H | 16.220341177286 | 20.273460453972 | -5.301431502004 |
| C | 15.537944386710 | 22.265936735709 | -4.511065301970 |
| C | 14.318046349453 | 21.950416257545 | -3.911371997703 |
| C | 13.443279972136 | 22.818167669428 | -3.256689916008 |
| C | 12.192160014551 | 22.438497024570 | -2.652049921823 |
| H | 11.781897167231 | 21.439690457768 | -2.628973877917 |
| C | 11.655598479307 | 23.573290635841 | -2.128327911907 |
| H | 10.721165616832 | 23.680948429751 | -1.597500366705 |
| C | 12.581251821124 | 24.637464231123 | -2.420674828676 |
| C | 12.415555276430 | 25.973824427952 | -2.052244186634 |
| C | 13.286233474623 | 27.035823413442 | -2.295269057456 |
| C | 13.085072906319 | 28.396575307342 | -1.864377993867 |
| H | 12.229976220789 | 28.761591182164 | -1.314291597768 |
| C | 14.176327115901 | 29.094340685359 | -2.276991201579 |
| H | 14.386774412075 | 30.144892737814 | -2.132692295937 |
| C | 15.032998152720 | 28.159248465123 | -2.966053517682 |
| C | 15.519144841643 | 30.675833672640 | -7.733908618837 |
| C | 16.321167948432 | 33.339578072907 | -7.639340034687 |
| H | 16.637322200360 | 34.377146759735 | -7.614655529264 |
| C | 16.158755969445 | 32.651102864346 | -6.438267616951 |
| C | 16.298521658340 | 33.301410457906 | -5.067959295177 |
| C | 16.817664305815 | 32.247419440258 | -4.098608749834 |
| C | 15.776179750145 | 31.308895669532 | -6.509063612786 |
| C | 15.110444624618 | 29.254475724172 | -7.885095945716 |
| C | 16.409547419755 | 30.925187536124 | -4.263637417820 |
| C | 16.736858778158 | 29.911423616340 | -3.361758942184 |
| C | 17.621517322934 | 32.538029016097 | -2.993513199149 |
| H | 17.962356510373 | 33.555403945873 | -2.834872129210 |
| O | 15.077975787020 | 28.475897562767 | -6.801967561451 |
| H | 15.336495002612 | 28.985020881633 | -6.001964668724 |
| N | 16.068527556167 | 23.533289651186 | -4.537370583638 |
| O | 14.811366574092 | 28.774009654535 | -8.968981472374 |

|    |                 |                 |                  |
|----|-----------------|-----------------|------------------|
| C  | 15.670422316442 | 31.420394654471 | -8.911150106242  |
| H  | 15.460546011010 | 30.924722621879 | -9.852881922108  |
| C  | 17.531685120959 | 30.253075435109 | -2.265702319780  |
| H  | 17.793847705624 | 29.475228581438 | -1.554622520968  |
| C  | 17.995507685221 | 31.556646128426 | -2.071704982382  |
| C  | 16.085433927512 | 32.745766345843 | -8.886674516143  |
| C  | 18.886313378238 | 31.893950637252 | -0.908895778569  |
| H  | 19.924002315582 | 31.607661452714 | -1.114210374305  |
| H  | 18.875784120761 | 32.967610648171 | -0.705062892236  |
| H  | 18.579961355090 | 31.365898101768 | -0.001662883062  |
| C  | 16.281487140346 | 33.527481916779 | -10.154531014027 |
| H  | 17.337601915047 | 33.775829788468 | -10.303940211925 |
| H  | 15.944788343474 | 32.956208214559 | -11.022643561566 |
| H  | 15.728088218650 | 34.470912494268 | -10.128866878072 |
| C  | 17.196413259125 | 34.537664022143 | -5.109034751680  |
| H  | 18.205199389239 | 34.296609422998 | -5.455596619073  |
| H  | 16.771666660313 | 35.296349430089 | -5.770530318773  |
| H  | 17.268079033276 | 34.988496180138 | -4.116791624816  |
| C  | 14.890727954503 | 33.733167599485 | -4.597757301417  |
| H  | 14.950831808008 | 34.172401715794 | -3.597306584029  |
| H  | 14.480357568135 | 34.480256079204 | -5.283996869493  |
| H  | 14.202735061126 | 32.884245907383 | -4.560154744749  |
| Cl | 13.828587832061 | 20.267378919338 | -3.981805838195  |
| Cl | 10.937688354510 | 26.361808824862 | -1.189024102711  |
| Cl | 19.598505822861 | 24.089035345466 | -6.331476912776  |
| Ni | 15.270493639435 | 25.220096952089 | -3.754378297223  |

E = -4803.91679558 Hartrees

**[HOOC—NiP]<sup>2-</sup> (S=1)**

|   |                 |                 |                 |
|---|-----------------|-----------------|-----------------|
| N | 13.611804749882 | 24.292753009961 | -3.560145319148 |
| N | 17.178980146834 | 26.137772091091 | -4.046119412400 |
| N | 14.553018117611 | 26.999160563732 | -3.273074888491 |

|   |                 |                 |                 |
|---|-----------------|-----------------|-----------------|
| O | 15.763487924015 | 30.484265822982 | -5.256299497198 |
| C | 16.543321275472 | 28.464279461102 | -3.514397175520 |
| C | 17.453592217645 | 27.483941655849 | -3.887622331033 |
| C | 18.853695923852 | 27.742012507223 | -4.165558799977 |
| H | 19.327683985319 | 28.713044110296 | -4.125912086190 |
| C | 19.428491368980 | 26.552618254949 | -4.469684306325 |
| H | 20.460447926035 | 26.362687745191 | -4.728746306785 |
| C | 18.381792555212 | 25.553584363832 | -4.401368437188 |
| C | 18.545061900878 | 24.206989112908 | -4.663248345762 |
| C | 17.560060101822 | 23.187681173224 | -4.658504428792 |
| C | 17.767005013309 | 21.819491237584 | -4.981340522484 |
| H | 18.706656962053 | 21.366498273615 | -5.264289775667 |
| C | 16.538401256769 | 21.196225122728 | -4.852564409246 |
| H | 16.309418739138 | 20.152381556510 | -5.014735567367 |
| C | 15.616986525293 | 22.201507915664 | -4.454789442903 |
| C | 14.237443228519 | 22.016385924109 | -4.191969110201 |
| C | 13.314325716498 | 22.959304740815 | -3.780076340671 |
| C | 11.916535984703 | 22.700820399848 | -3.506881036233 |
| H | 11.425536887325 | 21.742858486590 | -3.600723159974 |
| C | 11.367730499541 | 23.877098354503 | -3.114180516422 |
| H | 10.342771140113 | 24.062949313256 | -2.826393962858 |
| C | 12.421729624631 | 24.867620584232 | -3.151957078024 |
| C | 12.273817579131 | 26.204132180262 | -2.831263544394 |
| C | 13.253094709145 | 27.224997396422 | -2.874329428487 |
| C | 13.053193387643 | 28.593382709518 | -2.543159601557 |
| H | 12.127395222653 | 29.037662668892 | -2.206300564952 |
| C | 14.264619180400 | 29.224166028607 | -2.752933541592 |
| H | 14.495780578723 | 30.270843909054 | -2.605426480973 |
| C | 15.174668551140 | 28.226486920671 | -3.204431544125 |
| C | 15.030145693037 | 30.663984421566 | -7.494200440844 |
| C | 15.775986734873 | 33.340805045467 | -7.531580517389 |
| H | 16.054196428857 | 34.389657132158 | -7.552770918366 |

|   |                 |                 |                  |
|---|-----------------|-----------------|------------------|
| C | 15.986279114190 | 32.612459399419 | -6.360493834243  |
| C | 16.501625628003 | 33.266836216454 | -5.083180283332  |
| C | 17.042976464461 | 32.199293135209 | -4.138899747188  |
| C | 15.607369124950 | 31.267845372633 | -6.364405009514  |
| C | 14.601734471003 | 29.242378703873 | -7.566475935841  |
| C | 16.626180388043 | 30.876282455123 | -4.249419121801  |
| C | 17.032366492261 | 29.863554525724 | -3.369383476793  |
| C | 17.910148838528 | 32.506613150350 | -3.083333244288  |
| H | 18.246016442311 | 33.529634849969 | -2.949306890204  |
| O | 14.753313524412 | 28.460719090916 | -6.496619026801  |
| H | 15.168972254299 | 28.949380622074 | -5.749927159466  |
| N | 16.241339326832 | 23.425359972337 | -4.338560677151  |
| O | 14.105866042182 | 28.764753993845 | -8.578299312885  |
| C | 14.836907305758 | 31.443651920927 | -8.640623556780  |
| H | 14.390156772273 | 30.967846583004 | -9.506530923571  |
| C | 17.899240344638 | 30.226247726640 | -2.337042857428  |
| H | 18.219775560483 | 29.458893292732 | -1.638237636890  |
| C | 18.351306654683 | 31.539898082890 | -2.178679607424  |
| C | 15.204356325733 | 32.782842327166 | -8.682219883102  |
| C | 19.293457284471 | 31.901819424932 | -1.064016628419  |
| H | 20.315689977017 | 31.578669856427 | -1.291022301784  |
| H | 19.317547138312 | 32.982994567357 | -0.905853892091  |
| H | 19.007270412718 | 31.419550081838 | -0.124828242859  |
| C | 14.976632246323 | 33.617865778133 | -9.911287671818  |
| H | 15.890043182470 | 34.139614097116 | -10.212480437975 |
| H | 14.640882026365 | 33.001520062441 | -10.748671278202 |
| H | 14.213661318670 | 34.383136385202 | -9.733152924138  |
| C | 17.574907219570 | 34.316375512072 | -5.399574106424  |
| H | 18.436975660070 | 33.866551668691 | -5.899447330773  |
| H | 17.170051211039 | 35.100429166431 | -6.043389445079  |
| H | 17.914805931698 | 34.807379064238 | -4.485436331476  |
| C | 15.306123252065 | 33.963575877086 | -4.397049026050  |

|    |                 |                 |                 |
|----|-----------------|-----------------|-----------------|
| H  | 15.630716125962 | 34.453081936848 | -3.473821521844 |
| H  | 14.882527573152 | 34.721632534387 | -5.063495661679 |
| H  | 14.521782237414 | 33.242709231676 | -4.149935460155 |
| Cl | 13.644381442697 | 20.369042809328 | -4.412684951832 |
| Cl | 10.666971411171 | 26.722308556092 | -2.319893468485 |
| Cl | 20.176631231728 | 23.670865226682 | -5.069307536255 |
| Ni | 15.396058204992 | 25.215126547330 | -3.806569758423 |

E = -4804.04052026 Hartrees

**[OOC--NiP]- (S=0)**

|   |                 |                 |                 |
|---|-----------------|-----------------|-----------------|
| N | 13.913774699339 | 24.029386055685 | -3.061121993640 |
| N | 16.626605524332 | 26.241965481157 | -4.647403995129 |
| N | 14.302284204316 | 26.703327960480 | -3.334155776359 |
| O | 16.058960446492 | 30.442559066557 | -5.568751098232 |
| C | 16.041639631547 | 28.411101456717 | -3.653146844557 |
| C | 16.864649362272 | 27.573325356851 | -4.396750081169 |
| C | 18.008890682390 | 28.031212770871 | -5.130260075258 |
| H | 18.401166290236 | 29.036816281525 | -5.091173865518 |
| C | 18.430475697153 | 26.989839492087 | -5.893035936889 |
| H | 19.253898479167 | 26.957167384306 | -6.590962119017 |
| C | 17.593117638778 | 25.875911069046 | -5.554997977206 |
| C | 17.814074370229 | 24.567525216431 | -5.955504955312 |
| C | 17.237107758241 | 23.468130210346 | -5.335501737601 |
| C | 17.697569097782 | 22.118338921872 | -5.464524424037 |
| H | 18.465219000505 | 21.783059710819 | -6.145586703018 |
| C | 17.017927607783 | 21.387369552415 | -4.542164072522 |
| H | 17.104576437497 | 20.332187992087 | -4.330504998692 |
| C | 16.098691655886 | 22.282857116883 | -3.907006454058 |
| C | 15.092544369024 | 21.898856619234 | -3.033610265637 |
| C | 14.013282291961 | 22.704407295062 | -2.704371890968 |
| C | 12.798227114348 | 22.240206672949 | -2.105842912889 |
| H | 12.631372223896 | 21.239849794766 | -1.735726049722 |

|   |                 |                 |                 |
|---|-----------------|-----------------|-----------------|
| C | 11.923020962820 | 23.279249193246 | -2.147653898323 |
| H | 10.900628597978 | 23.306687948196 | -1.801693775047 |
| C | 12.633392914252 | 24.389188095371 | -2.710267922395 |
| C | 12.161370377284 | 25.692985042576 | -2.765774022286 |
| C | 12.975911171535 | 26.794485504826 | -2.979069384255 |
| C | 12.611009376805 | 28.152048507356 | -2.697263384344 |
| H | 11.621936603382 | 28.480464663575 | -2.414987103555 |
| C | 13.747206372017 | 28.887056876005 | -2.817997750279 |
| H | 13.879918225998 | 29.949285672518 | -2.673057664946 |
| C | 14.782192176315 | 27.987831487557 | -3.242234167550 |
| C | 15.508164573623 | 30.920150285671 | -7.810178543546 |
| C | 16.320599274694 | 33.561770381857 | -7.489809421860 |
| H | 16.637526987371 | 34.593442061079 | -7.365917149803 |
| C | 16.404634636593 | 32.696578857948 | -6.392524054290 |
| C | 16.942645660031 | 33.208864324542 | -5.065583941706 |
| C | 16.909661382490 | 32.106198799689 | -4.020830532098 |
| C | 15.988983590953 | 31.378263917904 | -6.572144326029 |
| C | 15.012194435324 | 29.502593968167 | -8.023330124974 |
| C | 16.489792216487 | 30.812571933535 | -4.325427858430 |
| C | 16.473364468611 | 29.802043306038 | -3.348726372181 |
| C | 17.313461237423 | 32.370344215861 | -2.706735717263 |
| H | 17.648215621058 | 33.374104395286 | -2.457671206401 |
| O | 14.136292903911 | 29.068009849751 | -7.228458608302 |
| N | 16.243607216002 | 23.563376363735 | -4.389023130543 |
| O | 15.488576475571 | 28.881301818542 | -9.012736691508 |
| C | 15.468170359166 | 31.813929993612 | -8.878095857125 |
| H | 15.118371243543 | 31.453255937968 | -9.841210881860 |
| C | 16.873920929775 | 30.115439407312 | -2.051898959177 |
| H | 16.855281413386 | 29.332638064854 | -1.298352210522 |
| C | 17.302260268259 | 31.401113874758 | -1.706284061953 |
| C | 15.858489403768 | 33.149562598397 | -8.737340895536 |
| C | 17.722247187470 | 31.725451560905 | -0.300295946948 |



|    |                 |                 |                  |
|----|-----------------|-----------------|------------------|
| H  | 18.129420929799 | 32.737532406961 | -0.239904584108  |
| H  | 16.876490448095 | 31.663658445947 | 0.392969023083   |
| H  | 18.484363282580 | 31.028725685963 | 0.062421714282   |
| C  | 15.783030580198 | 34.111577220648 | -9.889847315792  |
| H  | 16.305877669556 | 33.724150574843 | -10.770008727697 |
| H  | 14.745967528948 | 34.298628735202 | -10.188246300205 |
| H  | 16.234823641301 | 35.071289725983 | -9.625402096821  |
| C  | 18.395191640188 | 33.686979156176 | -5.250715131566  |
| H  | 19.028087584472 | 32.873201619566 | -5.615899958978  |
| H  | 18.437398404735 | 34.508709209379 | -5.971934509674  |
| H  | 18.804445232684 | 34.043061358124 | -4.300976520397  |
| C  | 16.082685548323 | 34.394449477489 | -4.588776777768  |
| H  | 16.452141368631 | 34.777583946892 | -3.633539807300  |
| H  | 16.118413987139 | 35.209779976258 | -5.316799063989  |
| H  | 15.040042112236 | 34.092285942304 | -4.458540293876  |
| Cl | 15.099663115070 | 20.260611479077 | -2.449375678331  |
| Cl | 10.489850736511 | 25.974650430847 | -2.377850077301  |
| Cl | 19.008823445090 | 24.275924919080 | -7.185911654883  |
| Ni | 15.271116897369 | 25.134439302471 | -3.859297446212  |

E = -4803.34607814 Hartrees

**[OOC--NiP]<sup>2-</sup> (S=1/2)**

|   |                 |                 |                 |
|---|-----------------|-----------------|-----------------|
| N | 13.636127040145 | 24.231929704341 | -3.591828600532 |
| N | 17.198034123707 | 26.098997395791 | -4.029430626743 |
| N | 14.542354125986 | 26.939335602871 | -3.416382495599 |
| O | 15.875083628980 | 30.432622901194 | -5.399174166244 |
| C | 16.507072121475 | 28.423889119634 | -3.578774686487 |
| C | 17.451370017709 | 27.443678210646 | -3.906535564415 |
| C | 18.847894330662 | 27.719210112207 | -4.144331309047 |
| H | 19.302435817290 | 28.699196685378 | -4.117455060705 |
| C | 19.448428766220 | 26.526410177339 | -4.396806450174 |
| H | 20.489557066115 | 26.339606441840 | -4.616465009171 |

|   |                 |                 |                 |
|---|-----------------|-----------------|-----------------|
| C | 18.411647275009 | 25.527340372928 | -4.327463337771 |
| C | 18.592790586586 | 24.160021589413 | -4.534051411800 |
| C | 17.620847973971 | 23.158582545393 | -4.500527188397 |
| C | 17.854979593710 | 21.761358967020 | -4.760845578564 |
| H | 18.805160012088 | 21.316422891225 | -5.017930965284 |
| C | 16.656278020128 | 21.134856107973 | -4.621130418704 |
| H | 16.441477742469 | 20.083238050750 | -4.742600993142 |
| C | 15.699277473278 | 22.153412929308 | -4.274661444630 |
| C | 14.341659491951 | 21.937785979182 | -4.038347857318 |
| C | 13.372780723195 | 22.889422382573 | -3.718527773297 |
| C | 11.977119477298 | 22.615084435023 | -3.496021254664 |
| H | 11.513362466415 | 21.640290160800 | -3.534359667529 |
| C | 11.383935113029 | 23.811274157435 | -3.237537826330 |
| H | 10.341729138165 | 23.999868517825 | -3.024901166108 |
| C | 12.423974945549 | 24.805797437325 | -3.294350865893 |
| C | 12.249627761718 | 26.172729227235 | -3.072110787534 |
| C | 13.224433345851 | 27.169422478673 | -3.102102814079 |
| C | 13.001328005020 | 28.562625249120 | -2.805767451229 |
| H | 12.056367378638 | 29.004875278493 | -2.525744134146 |
| C | 14.202592448427 | 29.181035353682 | -2.949933553331 |
| H | 14.429655483302 | 30.228425187316 | -2.807060959023 |
| C | 15.151984783359 | 28.167170903973 | -3.339094126804 |
| C | 14.979437289037 | 30.774575247513 | -7.548564243907 |
| C | 15.604955791413 | 33.483179678802 | -7.428462634913 |
| H | 15.846524497229 | 34.541642607004 | -7.384770318536 |
| C | 15.930986613858 | 32.671254196989 | -6.337034202762 |
| C | 16.611220369933 | 33.264169038593 | -5.110680960738 |
| C | 17.054317627201 | 32.156244739471 | -4.165412580618 |
| C | 15.594319158252 | 31.316923459953 | -6.411419534975 |
| C | 14.592866502627 | 29.312627829706 | -7.658831705469 |
| C | 16.636401101374 | 30.836783630561 | -4.335117829406 |
| C | 16.986669876941 | 29.827096420337 | -3.420812759181 |

|    |                 |                 |                  |
|----|-----------------|-----------------|------------------|
| C  | 17.851706403893 | 32.447555500880 | -3.051169556033  |
| H  | 18.182580039534 | 33.469845767945 | -2.891143401549  |
| O  | 13.865354774961 | 28.832210020337 | -6.749656815131  |
| N  | 16.298276980980 | 23.388685916030 | -4.209762801949  |
| O  | 14.999658460202 | 28.700488122894 | -8.684914976200  |
| C  | 14.703172460630 | 31.619903966642 | -8.622719402228  |
| H  | 14.241568079331 | 31.195388181405 | -9.509580197797  |
| C  | 17.790754444284 | 30.167244688732 | -2.335085563881  |
| H  | 18.062865668519 | 29.388958279694 | -1.627846941084  |
| C  | 18.238095005796 | 31.476049059123 | -2.130537267647  |
| C  | 14.995041562867 | 32.984259905663 | -8.580602104881  |
| C  | 19.101125412525 | 31.819480462641 | -0.948450117833  |
| H  | 20.053320382167 | 31.279817855799 | -0.978910718252  |
| H  | 19.319834709669 | 32.889875602246 | -0.922198750010  |
| H  | 18.611104101476 | 31.551818371772 | -0.006714715960  |
| C  | 14.674480850305 | 33.886215202171 | -9.740644462493  |
| H  | 15.559169431315 | 34.441923666330 | -10.067667725655 |
| H  | 14.302205141941 | 33.310974599909 | -10.592119020630 |
| H  | 13.910634077937 | 34.624984780617 | -9.475654783671  |
| C  | 17.820290580332 | 34.110694939133 | -5.545552284353  |
| H  | 18.534652776076 | 33.507964041100 | -6.112791047167  |
| H  | 17.496161203216 | 34.945708389512 | -6.171237050523  |
| H  | 18.334666236092 | 34.532155296511 | -4.678588138510  |
| C  | 15.610010216119 | 34.168232768185 | -4.364420223437  |
| H  | 16.089050026974 | 34.624632227304 | -3.492904675544  |
| H  | 15.254302400048 | 34.969364118448 | -5.019707153512  |
| H  | 14.745444648381 | 33.592584096679 | -4.021929997990  |
| Cl | 13.788325981340 | 20.274654109560 | -4.145051394565  |
| Cl | 10.615358989808 | 26.694071690479 | -2.697662864171  |
| Cl | 20.231718672899 | 23.637748202215 | -4.889210257586  |
| Ni | 15.418296175074 | 25.166150767206 | -3.813708274558  |

E = -4803.48527041 Hartrees

**[OOC--NiP]<sup>3-</sup> (S=1)**

|   |                 |                 |                 |
|---|-----------------|-----------------|-----------------|
| N | 13.643630197284 | 24.188515796701 | -3.610093166510 |
| N | 17.202456889956 | 26.059146096745 | -4.036239411187 |
| N | 14.522116584744 | 26.927562411966 | -3.497297265211 |
| O | 15.963230261377 | 30.439160962403 | -5.514728012600 |
| C | 16.512669017483 | 28.402916216839 | -3.657258553735 |
| C | 17.448813782046 | 27.420025674667 | -3.940345838255 |
| C | 18.853764318736 | 27.686272479825 | -4.168710306566 |
| H | 19.308206753786 | 28.667385012587 | -4.157145496859 |
| C | 19.459712072520 | 26.493191623839 | -4.388749327240 |
| H | 20.505359741528 | 26.306964452797 | -4.589360343187 |
| C | 18.426954665186 | 25.480092080724 | -4.305902310823 |
| C | 18.627835612723 | 24.119465535182 | -4.457293787559 |
| C | 17.668611000822 | 23.078943040375 | -4.377571624732 |
| C | 17.923211483460 | 21.688851663727 | -4.529311791352 |
| H | 18.883090814972 | 21.235920633756 | -4.734652876442 |
| C | 16.707635469631 | 21.047350619757 | -4.367406382489 |
| H | 16.511210851014 | 19.985718873755 | -4.418918441785 |
| C | 15.747253407005 | 22.062543437997 | -4.120771147120 |
| C | 14.360008652079 | 21.872348999620 | -3.917907171771 |
| C | 13.389953328831 | 22.829556477836 | -3.696182082281 |
| C | 11.978960112333 | 22.566427553571 | -3.522730527715 |
| H | 11.517208668999 | 21.589831369003 | -3.548914671496 |
| C | 11.374805936353 | 23.765334163304 | -3.328434910622 |
| H | 10.323360066344 | 23.955473334622 | -3.165410261359 |
| C | 12.413550084597 | 24.772393251229 | -3.372634127719 |
| C | 12.222647868876 | 26.130096701459 | -3.189573151172 |
| C | 13.196454179318 | 27.157542387746 | -3.205360229161 |
| C | 12.967452652700 | 28.534654447464 | -2.928982660761 |
| H | 12.018432540266 | 28.981944537715 | -2.668299328449 |
| C | 14.189519746210 | 29.164376893023 | -3.062054249619 |

|   |                 |                 |                  |
|---|-----------------|-----------------|------------------|
| H | 14.407231254309 | 30.216007958163 | -2.930629592006  |
| C | 15.131914852972 | 28.162624590844 | -3.424481448621  |
| C | 14.962710221499 | 30.869736687060 | -7.604256947412  |
| C | 15.546464788084 | 33.578701096830 | -7.378755763504  |
| H | 15.770848141379 | 34.637973804965 | -7.284845414388  |
| C | 15.947480360191 | 32.718129328629 | -6.352168520040  |
| C | 16.698201160167 | 33.270456931468 | -5.150876913291  |
| C | 17.081974053611 | 32.145546585642 | -4.203295148003  |
| C | 15.626994824492 | 31.364077882630 | -6.471401488859  |
| C | 14.586662308696 | 29.409519767886 | -7.763781511583  |
| C | 16.673795667788 | 30.827862843106 | -4.407532777276  |
| C | 16.992953064075 | 29.804872657983 | -3.493728463606  |
| C | 17.842602453922 | 32.426886428955 | -3.061290185044  |
| H | 18.159067780428 | 33.450972534966 | -2.882548765747  |
| O | 13.871947671381 | 28.895813948372 | -6.863102474434  |
| N | 16.335946784477 | 23.311618284186 | -4.125219053226  |
| O | 14.984088400384 | 28.834032194424 | -8.814670272395  |
| C | 14.610235215238 | 31.763263051439 | -8.615060703893  |
| H | 14.102880805836 | 31.378355701322 | -9.495355595556  |
| C | 17.762408617189 | 30.139718047126 | -2.380113620887  |
| H | 18.006014992664 | 29.354077313057 | -1.670353590550  |
| C | 18.205928929114 | 31.445169508102 | -2.144064760528  |
| C | 14.872240362308 | 33.131789493499 | -8.514583056634  |
| C | 19.036175384852 | 31.774510794451 | -0.934621359176  |
| H | 19.996939558739 | 31.249430130457 | -0.953111462949  |
| H | 19.239313990966 | 32.847260584151 | -0.881311014052  |
| H | 18.528653310663 | 31.481937957161 | -0.009633051376  |
| C | 14.428481226297 | 34.094879929784 | -9.580940481920  |
| H | 15.180922457521 | 34.868754796615 | -9.757398385564  |
| H | 14.235945742344 | 33.579098955353 | -10.525560634403 |
| H | 13.501957001307 | 34.605302724439 | -9.292957612997  |
| C | 17.962592121735 | 34.008708680781 | -5.629392922466  |

|    |                 |                 |                 |
|----|-----------------|-----------------|-----------------|
| H  | 18.634875169364 | 33.327129163240 | -6.158038932131 |
| H  | 17.696555124101 | 34.825215175954 | -6.306152408316 |
| H  | 18.505068427687 | 34.437724864193 | -4.782411508310 |
| C  | 15.792910973679 | 34.264450668863 | -4.396771826699 |
| H  | 16.318319088118 | 34.664800513059 | -3.524634443061 |
| H  | 15.514590274740 | 35.099958190467 | -5.046248110560 |
| H  | 14.877624028590 | 33.771380197794 | -4.057579598536 |
| Cl | 13.816065851987 | 20.193248357359 | -3.957229731089 |
| Cl | 10.568871225713 | 26.661571918179 | -2.869249231351 |
| Cl | 20.278135335313 | 23.594464402325 | -4.806189538710 |
| Ni | 15.425585234893 | 25.123007624486 | -3.821721223073 |

E = -4803.60537825 Hartrees

**[OOC--Ni<sup>III</sup>(H)P]<sup>2-</sup> (S=1)**

|   |                 |                 |                 |
|---|-----------------|-----------------|-----------------|
| N | 13.579279135770 | 24.206342504748 | -3.267618381649 |
| N | 16.974967171992 | 26.181791617212 | -4.312871709794 |
| N | 14.401447163649 | 26.966429250718 | -3.309988437382 |
| O | 15.617633339630 | 30.615455677493 | -5.357066913972 |
| C | 16.321399237484 | 28.471900057201 | -3.667095265225 |
| C | 17.233249901038 | 27.513769522101 | -4.134069608608 |
| C | 18.586872871504 | 27.818565174062 | -4.536120558204 |
| H | 19.045397703777 | 28.795915109198 | -4.492594475479 |
| C | 19.138698984002 | 26.655525626031 | -4.974726261399 |
| H | 20.137080839342 | 26.494619050369 | -5.353767346766 |
| C | 18.124337007441 | 25.642290644760 | -4.821946147983 |
| C | 18.290561510755 | 24.282834641511 | -5.103272148876 |
| C | 17.400634733213 | 23.239576230800 | -4.826947832596 |
| C | 17.669554737586 | 21.836805634840 | -5.019026164017 |
| H | 18.586019446673 | 21.417396279510 | -5.406873173772 |
| C | 16.561521422241 | 21.169285422749 | -4.597658881341 |
| H | 16.400293123796 | 20.101582438828 | -4.580523013774 |
| C | 15.620050551660 | 22.170675255322 | -4.162759175900 |

|   |                 |                 |                 |
|---|-----------------|-----------------|-----------------|
| C | 14.335167241965 | 21.918138375039 | -3.673375151559 |
| C | 13.385856764611 | 22.851863986744 | -3.243597946664 |
| C | 12.076441839482 | 22.535029153669 | -2.732599312054 |
| H | 11.675157525379 | 21.541654414890 | -2.596740338766 |
| C | 11.471239858395 | 23.721774979900 | -2.456515538936 |
| H | 10.482751866668 | 23.882473538000 | -2.052420772873 |
| C | 12.418677108863 | 24.753914147554 | -2.793787765278 |
| C | 12.209640467501 | 26.128653313553 | -2.638506700676 |
| C | 13.127952493510 | 27.161193403910 | -2.848669191827 |
| C | 12.899391095577 | 28.556357191868 | -2.561083435428 |
| H | 11.977654301541 | 28.980952347784 | -2.191648470858 |
| C | 14.067149187322 | 29.198934714499 | -2.830570494607 |
| H | 14.284542730647 | 30.252178732889 | -2.721186152469 |
| C | 14.995683548544 | 28.198542302073 | -3.300729496796 |
| C | 15.192015577415 | 30.881154654430 | -7.675869028132 |
| C | 16.138888307070 | 33.501456648928 | -7.560029126573 |
| H | 16.495694193854 | 34.525743651375 | -7.525309101953 |
| C | 16.089562914980 | 32.751337751507 | -6.380372430120 |
| C | 16.432594871917 | 33.340022142100 | -5.017856882417 |
| C | 16.942619138029 | 32.217248292293 | -4.124172061542 |
| C | 15.631662786741 | 31.434003043007 | -6.464307432243 |
| C | 14.625788892746 | 29.478621592834 | -7.795806809618 |
| C | 16.468172303480 | 30.918079810626 | -4.322512235596 |
| C | 16.828340701720 | 29.861616158322 | -3.473754425058 |
| C | 17.811133603619 | 32.437573675065 | -3.051040722437 |
| H | 18.192055559012 | 33.436693002235 | -2.869058948263 |
| O | 13.730943992417 | 29.138744555697 | -6.975960924193 |
| H | 14.621755784953 | 25.363544535796 | -5.591115278064 |
| N | 16.150339972141 | 23.424128201630 | -4.304716968259 |
| O | 15.067801818164 | 28.774881224486 | -8.745788194148 |
| C | 15.269412249434 | 31.667116893607 | -8.825582119394 |
| H | 14.961748599970 | 31.224084782925 | -9.768423050508 |

|    |                 |                 |                  |
|----|-----------------|-----------------|------------------|
| C  | 17.695116845058 | 30.132610069554 | -2.412777020545  |
| H  | 17.976951968377 | 29.317182491240 | -1.752600166872  |
| C  | 18.202035477206 | 31.413907667972 | -2.186247209866  |
| C  | 15.736976142588 | 32.982635602103 | -8.791723678782  |
| C  | 19.147950392585 | 31.683441451223 | -1.048971715797  |
| H  | 20.148487884420 | 31.293475061314 | -1.267998456084  |
| H  | 19.245573249367 | 32.756505242606 | -0.865132452986  |
| H  | 18.815033563688 | 31.201565985755 | -0.125010651081  |
| C  | 15.820433127425 | 33.809411175766 | -10.044797386367 |
| H  | 16.409853438555 | 33.304359522016 | -10.816668461017 |
| H  | 14.828695771269 | 33.997312733309 | -10.470340373519 |
| H  | 16.287412497315 | 34.777204870750 | -9.843133386418  |
| C  | 17.442662684768 | 34.484029665012 | -5.131458049573  |
| H  | 18.380642326703 | 34.156521346758 | -5.589013597341  |
| H  | 17.031526893000 | 35.296870246000 | -5.734667251370  |
| H  | 17.663242158739 | 34.906859779083 | -4.148723187469  |
| C  | 15.135740253517 | 33.904600239956 | -4.394733741762  |
| H  | 15.349687829414 | 34.331260092310 | -3.409477319484  |
| H  | 14.726510717937 | 34.692478642428 | -5.034901667122  |
| H  | 14.376540427276 | 33.125929716536 | -4.277774984995  |
| Cl | 13.854702298224 | 20.235051708545 | -3.597124125569  |
| Cl | 10.626527194750 | 26.606400498731 | -2.058130269348  |
| Cl | 19.819634737716 | 23.822990631495 | -5.825268939408  |
| Ni | 15.174209190878 | 25.223849322841 | -4.078789033179  |

E = -4804.02591363 Hartrees

**[OOC--Ni<sup>III</sup>(H)P]<sup>3-</sup> (S=3/2)**

|   |                 |                 |                 |
|---|-----------------|-----------------|-----------------|
| N | 13.659732456579 | 24.113998794731 | -3.121892675475 |
| N | 16.928468266144 | 26.249309004428 | -4.409707045130 |
| N | 14.470722970605 | 26.892910412544 | -3.036523285862 |
| O | 15.652154242603 | 30.575190430381 | -5.419188815907 |
| C | 16.266402830799 | 28.496646058355 | -3.595253537172 |



|   |                 |                 |                 |
|---|-----------------|-----------------|-----------------|
| C | 17.151754760867 | 27.597249634159 | -4.244769780156 |
| C | 18.408942138595 | 27.962594442416 | -4.805947968164 |
| H | 18.829713135678 | 28.958705061395 | -4.809927958003 |
| C | 18.962194071473 | 26.810514351682 | -5.329133612068 |
| H | 19.914270426552 | 26.698146882529 | -5.827908633369 |
| C | 18.032488980160 | 25.764545746583 | -5.062462811050 |
| C | 18.198324991838 | 24.396311582286 | -5.394444008189 |
| C | 17.351356034337 | 23.336173622746 | -5.105536163284 |
| C | 17.600170692473 | 21.948583073442 | -5.436626319786 |
| H | 18.481643039082 | 21.572774244634 | -5.935872556128 |
| C | 16.524591083781 | 21.242040694494 | -5.004994502134 |
| H | 16.361519485729 | 20.176577161227 | -5.081396360308 |
| C | 15.611667070029 | 22.190759938051 | -4.406927670332 |
| C | 14.380336696989 | 21.883895274057 | -3.854051062613 |
| C | 13.456380159822 | 22.756379182160 | -3.228931656755 |
| C | 12.228467654511 | 22.382866698441 | -2.619344947681 |
| H | 11.830920263513 | 21.380048847915 | -2.556205326745 |
| C | 11.670318724824 | 23.544780446517 | -2.118221840188 |
| H | 10.738324225059 | 23.651577442900 | -1.581855334696 |
| C | 12.569876708318 | 24.598200550452 | -2.445036976580 |
| C | 12.405649645549 | 25.969251709375 | -2.118738200015 |
| C | 13.276764131833 | 27.020364832449 | -2.369838528322 |
| C | 13.081994340429 | 28.391601554764 | -1.944952281513 |
| H | 12.228578973808 | 28.760881948942 | -1.394259632218 |
| C | 14.174671564833 | 29.084757641455 | -2.355285677468 |
| H | 14.386242948453 | 30.135027719534 | -2.206975123116 |
| C | 15.041059593848 | 28.150686043669 | -3.041871464291 |
| C | 15.557094945128 | 30.735886583336 | -7.784757387731 |
| C | 16.341523436552 | 33.410966703627 | -7.641947771826 |
| H | 16.643300710814 | 34.452287502162 | -7.597984074689 |
| C | 16.164708103006 | 32.695142740137 | -6.453177830690 |
| C | 16.286030780205 | 33.319940242978 | -5.070347770586 |

|   |                 |                 |                  |
|---|-----------------|-----------------|------------------|
| C | 16.814827963022 | 32.249631776299 | -4.124606389594  |
| C | 15.784298164521 | 31.354147927396 | -6.548471367039  |
| C | 15.095596454200 | 29.297530314464 | -7.908217088440  |
| C | 16.406572339012 | 30.925240289664 | -4.322334327586  |
| C | 16.734542512960 | 29.905298097548 | -3.422901040642  |
| C | 17.617217183060 | 32.529295559530 | -3.017111315253  |
| H | 17.950614555915 | 33.547541413357 | -2.844755467989  |
| O | 14.049139923265 | 28.970471658099 | -7.286575192697  |
| N | 16.138570970612 | 23.464306851498 | -4.471519271356  |
| O | 15.776970652867 | 28.548977252421 | -8.661804698086  |
| C | 15.749912143025 | 31.488601485509 | -8.943865103702  |
| H | 15.585328179682 | 31.008847446415 | -9.904990733374  |
| C | 17.532206428896 | 30.237771905727 | -2.323418216946  |
| H | 17.796405692696 | 29.450708259877 | -1.622582063798  |
| C | 17.996299178546 | 31.536057556420 | -2.108488549744  |
| C | 16.142762341218 | 32.828707157865 | -8.895405083697  |
| C | 18.885575562864 | 31.857514500554 | -0.939181108661  |
| H | 19.931798263139 | 31.949032325563 | -1.252317746539  |
| H | 18.606792643876 | 32.805793089282 | -0.470153430725  |
| H | 18.837679004814 | 31.072237726621 | -0.179987030335  |
| C | 16.349346473976 | 33.618650924007 | -10.158200363367 |
| H | 17.170290494928 | 33.206734564699 | -10.755042939757 |
| H | 15.455948368392 | 33.603753964275 | -10.790748004098 |
| H | 16.588503050264 | 34.661718788544 | -9.934705663235  |
| C | 17.163349592665 | 34.571674120679 | -5.074488590740  |
| H | 18.179854705842 | 34.354576079080 | -5.415496051381  |
| H | 16.734879858891 | 35.337926243733 | -5.725210270667  |
| H | 17.218710047366 | 35.002908922707 | -4.072127976732  |
| C | 14.869039961511 | 33.718445374619 | -4.598438626728  |
| H | 14.913000367957 | 34.139787061286 | -3.589026796341  |
| H | 14.446539934413 | 34.469749460556 | -5.273147502952  |
| H | 14.198584628505 | 32.854837973264 | -4.581319150742  |

|    |                 |                 |                 |
|----|-----------------|-----------------|-----------------|
| Cl | 13.899488181188 | 20.190011393892 | -3.892593144334 |
| Cl | 10.914802963338 | 26.364704991696 | -1.264919961782 |
| Cl | 19.695762525622 | 24.002084286716 | -6.236166218568 |
| Ni | 15.160070050502 | 25.228763940153 | -4.036212074779 |
| H  | 14.458742121630 | 25.468066325027 | -5.483882927354 |

E = -4804.15274614 Hartrees

## 2-Ni (S=0)

|   |                 |                 |                 |
|---|-----------------|-----------------|-----------------|
| N | 13.771423076963 | 24.434297056662 | -3.366151711734 |
| N | 16.944961982709 | 26.466635886050 | -4.075894850986 |
| N | 14.801643965591 | 26.779678855423 | -2.452449718181 |
| O | 16.007245514286 | 30.174516568078 | -5.170628948494 |
| C | 16.334668131689 | 28.606010110166 | -3.026680724232 |
| C | 17.186685969960 | 27.777640884684 | -3.753448835477 |
| C | 18.518823625421 | 28.155205379954 | -4.128559865535 |
| H | 18.947448715655 | 29.133634223176 | -3.965852017483 |
| C | 19.110131572448 | 27.049845724084 | -4.652785876685 |
| H | 20.115132617323 | 26.941357998338 | -5.031822274254 |
| C | 18.111098866055 | 26.022575389092 | -4.658162110639 |
| C | 18.223705014549 | 24.805291853222 | -5.311785366678 |
| C | 17.140920124786 | 23.981545129260 | -5.587485598137 |
| C | 17.137641820099 | 22.921629451224 | -6.550025298561 |
| H | 18.000649424495 | 22.583741061821 | -7.103920869536 |
| C | 15.855308613805 | 22.479153450209 | -6.636515880794 |
| H | 15.460210755580 | 21.691728253674 | -7.260814003437 |
| C | 15.100468099887 | 23.225046865900 | -5.674425510427 |
| C | 13.801264479013 | 22.934123573660 | -5.283908073076 |
| C | 13.219965668845 | 23.429299853172 | -4.126365980373 |
| C | 12.058256509365 | 22.881887448941 | -3.490580442904 |
| H | 11.448421164141 | 22.086576707364 | -3.892778976647 |
| C | 11.926679248898 | 23.526699055752 | -2.301512223429 |
| H | 11.174529750977 | 23.383444776579 | -1.540401882944 |

|   |                 |                 |                  |
|---|-----------------|-----------------|------------------|
| C | 12.966275326447 | 24.511564965748 | -2.254270794135  |
| C | 13.057982209917 | 25.523240133113 | -1.309228629837  |
| C | 13.845248380284 | 26.652975005464 | -1.474256988460  |
| C | 13.680961960545 | 27.880593367594 | -0.751793956511  |
| H | 12.987216223035 | 28.029855450906 | 0.061984088697   |
| C | 14.510948703683 | 28.783524739059 | -1.335761065314  |
| H | 14.656544341437 | 29.823534606220 | -1.083147107491  |
| C | 15.240229627215 | 28.080318237017 | -2.352927797464  |
| C | 15.612320869967 | 30.010904538658 | -7.468664297529  |
| C | 16.175287774941 | 32.674692969148 | -7.843409583646  |
| H | 16.384838508334 | 33.728458029885 | -8.001679181236  |
| C | 16.266193644231 | 32.153919682981 | -6.546962091626  |
| C | 16.630436378720 | 33.040299092614 | -5.361905492823  |
| C | 16.816994835551 | 32.195715723629 | -4.107822566427  |
| C | 15.971437368905 | 30.803107296626 | -6.375703623317  |
| C | 16.499996789003 | 30.842284295726 | -4.082160792191  |
| C | 16.658391791649 | 30.052678922722 | -2.932720173212  |
| C | 17.299221171902 | 32.757196314225 | -2.918833169867  |
| H | 17.559070560434 | 33.811996861937 | -2.904022285664  |
| N | 15.888568081880 | 24.164367940561 | -5.049869980508  |
| C | 15.525018649670 | 30.544468775551 | -8.742263535744  |
| H | 15.232185373154 | 29.914635630507 | -9.575300277028  |
| C | 17.136054903094 | 30.655312871649 | -1.773596510924  |
| H | 17.274137145865 | 30.049977685515 | -0.882803840110  |
| C | 17.466589169278 | 32.016123286468 | -1.749538762246  |
| C | 15.817120547930 | 31.898733887969 | -8.945693464837  |
| C | 17.995485611475 | 32.651315777010 | -0.494224546789  |
| H | 18.846039181433 | 32.089672854223 | -0.095771429022  |
| H | 18.320440016037 | 33.677354627252 | -0.682062769784  |
| H | 17.231201550271 | 32.678108599446 | 0.290017855979   |
| C | 15.735280330356 | 32.495194554347 | -10.322919746479 |
| H | 16.519813270521 | 32.093793880718 | -10.973095907510 |

|    |                 |                 |                  |
|----|-----------------|-----------------|------------------|
| H  | 14.776601501892 | 32.267340164046 | -10.798301778651 |
| H  | 15.852300597738 | 33.580650774632 | -10.285456700884 |
| C  | 17.931121456687 | 33.804433986788 | -5.663236532949  |
| H  | 18.758618904234 | 33.110162316523 | -5.831562714183  |
| H  | 17.816861979230 | 34.429443729661 | -6.551998857490  |
| H  | 18.193746795684 | 34.456900668050 | -4.826613000249  |
| C  | 15.493919532376 | 34.053242500327 | -5.122634222102  |
| H  | 15.744567857428 | 34.704534129495 | -4.280130874737  |
| H  | 15.348152974741 | 34.676004058632 | -6.010150114409  |
| H  | 14.554134331822 | 33.541454644022 | -4.897726755173  |
| Cl | 12.916798945256 | 21.749892670681 | -6.199037451520  |
| Cl | 12.000613189235 | 25.456231919810 | 0.069946240697   |
| Cl | 19.771474111964 | 24.370822541947 | -5.975231102071  |
| Ni | 15.348862563018 | 25.464045909272 | -3.741462957320  |
| Br | 15.216875198984 | 28.184959495133 | -7.158130075259  |

E = -7186.75490703 Hartrees

**[2-Ni]<sup>-</sup>** (S=1/2)

|   |                 |                 |                 |
|---|-----------------|-----------------|-----------------|
| N | 13.604575343685 | 24.322999065698 | -3.520659115354 |
| N | 17.143546847299 | 26.203662867003 | -4.055846599628 |
| N | 14.559851857015 | 26.990485773405 | -3.140903788825 |
| O | 15.759078114752 | 30.418516501431 | -5.157706350381 |
| C | 16.507430178089 | 28.485591010731 | -3.376913047853 |
| C | 17.424382290246 | 27.528438134583 | -3.824807954746 |
| C | 18.807138998937 | 27.813369666929 | -4.124918616036 |
| H | 19.279708454109 | 28.780573918648 | -4.029825667172 |
| C | 19.369473913441 | 26.645697964038 | -4.534271666834 |
| H | 20.389852729247 | 26.471186396320 | -4.842737535059 |
| C | 18.324717742776 | 25.653692565193 | -4.490736675289 |
| C | 18.467719234270 | 24.315519755829 | -4.856456056703 |
| C | 17.483138203819 | 23.325859278673 | -4.862513506045 |
| C | 17.680047189984 | 21.958059744704 | -5.268100798624 |

|   |                 |                 |                 |
|---|-----------------|-----------------|-----------------|
| H | 18.610620085371 | 21.529052829263 | -5.609633949037 |
| C | 16.480520255416 | 21.334407922951 | -5.123156816153 |
| H | 16.243372659402 | 20.300592129505 | -5.327871368266 |
| C | 15.560234876500 | 22.325065909178 | -4.627114710145 |
| C | 14.220291351578 | 22.096978271911 | -4.312410859534 |
| C | 13.304250951723 | 23.008593736417 | -3.786095140278 |
| C | 11.942083261115 | 22.709045610155 | -3.426360742236 |
| H | 11.458915252765 | 21.748610915461 | -3.530678668710 |
| C | 11.411915170444 | 23.858148880459 | -2.928287178441 |
| H | 10.412486252488 | 24.016229370616 | -2.550519322666 |
| C | 12.451263560974 | 24.852510256533 | -2.994790880523 |
| C | 12.322288695417 | 26.183398145322 | -2.593584983492 |
| C | 13.289128433351 | 27.186417566705 | -2.655096845924 |
| C | 13.099511629003 | 28.555651593802 | -2.247110681409 |
| H | 12.195473312838 | 28.966479835967 | -1.822239467654 |
| C | 14.272949188247 | 29.194608690976 | -2.496144512332 |
| H | 14.514439911034 | 30.233357948471 | -2.317046067638 |
| C | 15.173573710806 | 28.214615599614 | -3.051755996121 |
| C | 15.123783252095 | 30.529663447740 | -7.412583666212 |
| C | 15.852548130872 | 33.175778483234 | -7.564254013966 |
| H | 16.132970225302 | 34.221633989273 | -7.634584221222 |
| C | 16.013161189119 | 32.513259183013 | -6.345730155980 |
| C | 16.485794141425 | 33.221860385932 | -5.080139928429 |
| C | 17.009604158985 | 32.190833885104 | -4.085202729446 |
| C | 15.640055062089 | 31.168021834469 | -6.287011422272 |
| C | 16.589743391980 | 30.864314285763 | -4.159440202975 |
| C | 16.983428679411 | 29.891443158957 | -3.231722811760 |
| C | 17.852744591449 | 32.532934014186 | -3.021629354518 |
| H | 18.189611669057 | 33.559803881812 | -2.919824394552 |
| N | 16.183108540145 | 23.540430399856 | -4.473981566526 |
| C | 14.954463439140 | 31.210155840826 | -8.609826937357 |
| H | 14.550513853350 | 30.689914601405 | -9.471471772958 |

|    |                 |                 |                  |
|----|-----------------|-----------------|------------------|
| C  | 17.826521486612 | 30.280802320301 | -2.193374723558  |
| H  | 18.136841931071 | 29.537061866962 | -1.465047488637  |
| C  | 18.272158532935 | 31.600818062642 | -2.070723871304  |
| C  | 15.323176171984 | 32.553969776893 | -8.699605845198  |
| C  | 19.193379265722 | 31.999917999870 | -0.951451016420  |
| H  | 20.229083263282 | 31.717492699771 | -1.171481058112  |
| H  | 19.174047646277 | 33.081190308262 | -0.794167056744  |
| H  | 18.918447944012 | 31.508889054047 | -0.013725342017  |
| C  | 15.139073521317 | 33.317322960584 | -9.981223116732  |
| H  | 16.063004900516 | 33.822983482396 | -10.277607538817 |
| H  | 14.834059843250 | 32.655015495352 | -10.794582605861 |
| H  | 14.369960610081 | 34.089608264598 | -9.873862225385  |
| C  | 17.554451831392 | 34.272727614820 | -5.404881165698  |
| H  | 18.434407913225 | 33.816096942843 | -5.865807224895  |
| H  | 17.157046131092 | 35.027937968062 | -6.086758647784  |
| H  | 17.866392339314 | 34.797401532630 | -4.499244848209  |
| C  | 15.266951687224 | 33.927895227715 | -4.446575318344  |
| H  | 15.565547873702 | 34.440963510953 | -3.527174325705  |
| H  | 14.856348690331 | 34.666498833878 | -5.142108356953  |
| H  | 14.480606240721 | 33.208440192827 | -4.202073567760  |
| Cl | 13.620218160987 | 20.472813573942 | -4.601860263270  |
| Cl | 10.761944504865 | 26.646412832817 | -1.934968291667  |
| Cl | 20.071279978224 | 23.817088490639 | -5.367590717775  |
| Ni | 15.369822257823 | 25.268974019650 | -3.810739639276  |
| Br | 14.652481293476 | 28.705228719486 | -7.277354996599  |

E = -7186.89491146 Hartrees

**[2-Ni]<sup>2-</sup> (S=1)**

|   |                 |                 |                 |
|---|-----------------|-----------------|-----------------|
| N | 13.601229669786 | 24.310051002634 | -3.503965713317 |
| N | 17.127984693635 | 26.207686101495 | -4.060751571285 |
| N | 14.542207297282 | 26.999447321193 | -3.102716540113 |
| O | 15.766985858699 | 30.425173877527 | -5.160719413543 |

|   |                 |                 |                 |
|---|-----------------|-----------------|-----------------|
| C | 16.505760225837 | 28.493196378531 | -3.363662010616 |
| C | 17.406262505051 | 27.544366744266 | -3.821229984371 |
| C | 18.789409663415 | 27.828977231752 | -4.142585166274 |
| H | 19.262573144522 | 28.796588650575 | -4.046565116069 |
| C | 19.349553987442 | 26.668998875036 | -4.566960349930 |
| H | 20.367467972282 | 26.502192816248 | -4.889475472744 |
| C | 18.309618066381 | 25.661473645910 | -4.519867924929 |
| C | 18.461363213014 | 24.338624201333 | -4.895798686182 |
| C | 17.481119522078 | 23.314822357089 | -4.904810652078 |
| C | 17.678654194124 | 21.968368577559 | -5.315663962954 |
| H | 18.605454766456 | 21.541955801044 | -5.672417507637 |
| C | 16.463296665673 | 21.327116959598 | -5.156285587675 |
| H | 16.233264344108 | 20.291576483237 | -5.363854798859 |
| C | 15.558909694725 | 22.298136797024 | -4.652199845104 |
| C | 14.202626990571 | 22.082859852260 | -4.311201635431 |
| C | 13.303056633607 | 22.984656231169 | -3.777229924002 |
| C | 11.937594667687 | 22.686739871218 | -3.405216287331 |
| H | 11.453675428327 | 21.726262602096 | -3.511831711162 |
| C | 11.409209122988 | 23.828298411748 | -2.897418408472 |
| H | 10.410915110183 | 23.979261985392 | -2.512117536642 |
| C | 12.445007645027 | 24.836993339552 | -2.961178292265 |
| C | 12.308708037593 | 26.151031514179 | -2.549597042152 |
| C | 13.272848995169 | 27.186457345406 | -2.603061957760 |
| C | 13.083217287296 | 28.533589229585 | -2.186597138516 |
| H | 12.182354517590 | 28.941860397001 | -1.750792750370 |
| C | 14.272639305270 | 29.188832992351 | -2.441699514492 |
| H | 14.508287179890 | 30.228279172702 | -2.254365540105 |
| C | 15.156726550057 | 28.230012195167 | -3.008795886159 |
| C | 15.151292009609 | 30.526894490016 | -7.420749543446 |
| C | 15.878487475801 | 33.172900251526 | -7.576488368019 |
| H | 16.157796863776 | 34.218954545795 | -7.648583549048 |
| C | 16.028888036707 | 32.515506757240 | -6.353865276563 |



|    |                 |                 |                  |
|----|-----------------|-----------------|------------------|
| C  | 16.489539476130 | 33.228411267022 | -5.086322322667  |
| C  | 17.007860681759 | 32.200771208362 | -4.084572763109  |
| C  | 15.657422027285 | 31.169586704197 | -6.292594905942  |
| C  | 16.589604793622 | 30.873584118503 | -4.155016422830  |
| C  | 16.978568280724 | 29.900054794344 | -3.224096843411  |
| C  | 17.846078307281 | 32.549053694925 | -3.018153247178  |
| H  | 18.181735847578 | 33.576683518879 | -2.919101523731  |
| N  | 16.182265294368 | 23.520733661170 | -4.498445110489  |
| C  | 14.992399304401 | 31.202201342774 | -8.622332556547  |
| H  | 14.596948159382 | 30.678079603039 | -9.485636564520  |
| C  | 17.814116905207 | 30.299657745922 | -2.182789317337  |
| H  | 18.120708311295 | 29.559541291851 | -1.448818810313  |
| C  | 18.260738837403 | 31.620284496356 | -2.062722527788  |
| C  | 15.360753967230 | 32.545957746107 | -8.714353887220  |
| C  | 19.178007784238 | 32.021993170612 | -0.940835077632  |
| H  | 20.214706541351 | 31.738792462988 | -1.155658266030  |
| H  | 19.158728166890 | 33.103703371028 | -0.785601223822  |
| H  | 18.899614415942 | 31.533160141225 | -0.002822543107  |
| C  | 15.188383349857 | 33.303622656336 | -10.000992683717 |
| H  | 16.116368122142 | 33.804275689002 | -10.293635453735 |
| H  | 14.887129027471 | 32.637980813535 | -10.813070838100 |
| H  | 14.421367395600 | 34.079278954245 | -9.903435425204  |
| C  | 17.558003848028 | 34.281130354151 | -5.406254052278  |
| H  | 18.441892464494 | 33.825192657201 | -5.860370564592  |
| H  | 17.163810481505 | 35.034404054744 | -6.092235558613  |
| H  | 17.863650646259 | 34.807814126104 | -4.499646489372  |
| C  | 15.264934478736 | 33.933848260830 | -4.463118280611  |
| H  | 15.556569755364 | 34.447983558318 | -3.541982923524  |
| H  | 14.857799506335 | 34.671434688864 | -5.161877293033  |
| H  | 14.477955872609 | 33.213531372760 | -4.223060529379  |
| Cl | 13.606244944457 | 20.447171734753 | -4.601045297108  |
| Cl | 10.745673618698 | 26.609132888492 | -1.867010022952  |

|    |                 |                 |                 |
|----|-----------------|-----------------|-----------------|
| Cl | 20.069618187095 | 23.846330827969 | -5.432717444240 |
| Ni | 15.360362241069 | 25.264630299251 | -3.805155078156 |
| Br | 14.678755616535 | 28.702858717685 | -7.281885486093 |

E = -7187.01736302 Hartrees

### 3-Ni (S=0)

|   |                 |                 |                 |
|---|-----------------|-----------------|-----------------|
| N | 13.623488599666 | 24.287799479633 | -3.482462404529 |
| N | 16.894209871406 | 26.195183106652 | -4.142526891200 |
| N | 14.408035294382 | 26.880965262513 | -3.283988964954 |
| C | 16.040583328164 | 28.475793761568 | -4.130152540241 |
| C | 17.055721615438 | 27.549884428210 | -4.317484278441 |
| C | 18.427258860955 | 27.875787557575 | -4.572458713773 |
| H | 18.806346639557 | 28.870168684093 | -4.753632580467 |
| C | 19.122996076607 | 26.711748962579 | -4.495834593155 |
| H | 20.184449965207 | 26.557793491506 | -4.619633237572 |
| C | 18.161450464526 | 25.675522842123 | -4.264875309620 |
| C | 18.432883073496 | 24.316730738694 | -4.317718698681 |
| C | 17.452988974171 | 23.344939118449 | -4.453285378828 |
| C | 17.690669330708 | 21.997530906073 | -4.878003572294 |
| H | 18.664289887068 | 21.557685029030 | -5.034571381815 |
| C | 16.470992286877 | 21.437070702930 | -5.087647642369 |
| H | 16.244221036045 | 20.438498341501 | -5.429869792567 |
| C | 15.499007487973 | 22.424157565857 | -4.722393397210 |
| C | 14.134981642427 | 22.196052672145 | -4.618603958245 |
| C | 13.266638049457 | 23.043725684345 | -3.947582709832 |
| C | 11.950103296216 | 22.688213024287 | -3.508383795495 |
| H | 11.441573578156 | 21.768272147665 | -3.755047384499 |
| C | 11.521135146601 | 23.701200065472 | -2.711442254720 |
| H | 10.580648018799 | 23.787640672484 | -2.188525427628 |
| C | 12.547561899545 | 24.700500611682 | -2.732330745323 |
| C | 12.420289824503 | 25.977678437659 | -2.207193033514 |
| C | 13.250732020481 | 27.032138397182 | -2.557056814472 |

|    |                 |                 |                 |
|----|-----------------|-----------------|-----------------|
| C  | 12.941679445872 | 28.417521855660 | -2.361859863736 |
| H  | 12.087033322495 | 28.791062171699 | -1.817949630313 |
| C  | 13.894792831823 | 29.123972712683 | -3.024110798063 |
| H  | 13.990276489760 | 30.195263456181 | -3.117991127994 |
| C  | 14.817232886867 | 28.165540541773 | -3.556113644493 |
| N  | 16.105898423609 | 23.600745352295 | -4.348366037982 |
| Cl | 16.382325832076 | 30.143224996246 | -4.479591602585 |
| Cl | 11.052935759429 | 26.312894139125 | -1.190406996720 |
| Cl | 20.095012147025 | 23.815624103083 | -4.370798470465 |
| Cl | 13.509543210578 | 20.688263174080 | -5.213256807876 |
| Ni | 15.259196382036 | 25.240979805268 | -3.811553518327 |

E = -4339.75197267 Hartrees

**[3-Ni]<sup>-</sup> (S=1/2)**

|   |                 |                 |                 |
|---|-----------------|-----------------|-----------------|
| N | 13.540760798154 | 24.233667552157 | -3.457969347142 |
| N | 16.974440141053 | 26.245532495160 | -4.168787000820 |
| N | 14.367831002769 | 26.965333012258 | -3.246222001872 |
| C | 16.251414554448 | 28.490971896323 | -3.536881375371 |
| C | 17.216388281892 | 27.584264285814 | -3.976979382445 |
| C | 18.577820129734 | 27.914840770483 | -4.313963979755 |
| H | 19.022277365435 | 28.896858480132 | -4.246820825420 |
| C | 19.165275615734 | 26.761223479962 | -4.727075081449 |
| H | 20.181224547486 | 26.618589932317 | -5.064179418219 |
| C | 18.160510622292 | 25.733578944217 | -4.634839032018 |
| C | 18.349724446355 | 24.391505189144 | -4.964816467027 |
| C | 17.427102039923 | 23.351015262653 | -4.854588246852 |
| C | 17.690758732057 | 21.968918749677 | -5.163575989414 |
| H | 18.624985039342 | 21.574196398316 | -5.534913600361 |
| C | 16.549856237137 | 21.284996191069 | -4.883558090041 |
| H | 16.371719449936 | 20.224937735152 | -4.989143527251 |
| C | 15.594894051729 | 22.256507877858 | -4.414108622267 |
| C | 14.284092293710 | 21.977677134516 | -4.026491265034 |

|    |                 |                 |                 |
|----|-----------------|-----------------|-----------------|
| C  | 13.315429777360 | 22.885864176205 | -3.597557996807 |
| C  | 11.955956773382 | 22.552984606493 | -3.255893472180 |
| H  | 11.524855630294 | 21.563165588453 | -3.283113794923 |
| C  | 11.346645027787 | 23.717943455381 | -2.912387522635 |
| H  | 10.323614305774 | 23.863474677683 | -2.598714098855 |
| C  | 12.341523907022 | 24.752307946995 | -3.034825698352 |
| C  | 12.133762556183 | 26.104919034762 | -2.764458505273 |
| C  | 13.063318793650 | 27.141323393937 | -2.853506961702 |
| C  | 12.795144690805 | 28.526144634716 | -2.560727117906 |
| H  | 11.845916768277 | 28.931298339688 | -2.241887863845 |
| C  | 13.956621061848 | 29.198995793684 | -2.775603033589 |
| H  | 14.138968057099 | 30.257086813957 | -2.658631669262 |
| C  | 14.924460658365 | 28.220475361668 | -3.201260655227 |
| N  | 16.142049222730 | 23.516421188489 | -4.398292080779 |
| Cl | 13.795159765882 | 20.294098695441 | -4.096299276196 |
| Cl | 10.519736778963 | 26.552677915611 | -2.244323041840 |
| Cl | 16.759297001753 | 30.165702545868 | -3.406368674837 |
| Cl | 19.933758831293 | 23.963614971543 | -5.586504488943 |
| Ni | 15.256828042350 | 25.240034472218 | -3.816484794093 |

E = -4339.89694312 Hartrees

**[3-Ni]<sup>2-</sup> (S=1)**

|   |                 |                 |                 |
|---|-----------------|-----------------|-----------------|
| N | 13.539704993398 | 24.235943636836 | -3.465825435221 |
| N | 16.973846841111 | 26.245502799571 | -4.166813442379 |
| N | 14.355915728355 | 26.989951501926 | -3.238681500675 |
| C | 16.262804149523 | 28.501021276408 | -3.548203390164 |
| C | 17.212361926869 | 27.596111293336 | -3.982574576421 |
| C | 18.580548929078 | 27.919891931669 | -4.328148349842 |
| H | 19.025448858466 | 28.902808959585 | -4.268712806813 |
| C | 19.168718499612 | 26.767996853306 | -4.732638981301 |
| H | 20.185506711362 | 26.627727704756 | -5.069958740020 |
| C | 18.168019672863 | 25.727261816568 | -4.635106043520 |

|    |                  |                 |                 |
|----|------------------|-----------------|-----------------|
| C  | 18.366575667727  | 24.398722918229 | -4.956520491947 |
| C  | 17.446829353624  | 23.327092925607 | -4.853707524113 |
| C  | 17.710321704040  | 21.963947074586 | -5.154233125816 |
| H  | 18.6471111550404 | 21.562437832638 | -5.513722150539 |
| C  | 16.545788273401  | 21.270016882010 | -4.880827260306 |
| H  | 16.370732598763  | 20.209149513122 | -4.990633938616 |
| C  | 15.603010859067  | 22.230723831834 | -4.425502797769 |
| C  | 14.265626984972  | 21.972911497008 | -4.038319692587 |
| C  | 13.312934197165  | 22.878941484406 | -3.613299910601 |
| C  | 11.945590803193  | 22.554016093378 | -3.266049902374 |
| H  | 11.510141740392  | 21.565550972966 | -3.296792624981 |
| C  | 11.341334625588  | 23.714498057509 | -2.913390973822 |
| H  | 10.318910311017  | 23.857322890856 | -2.594515491478 |
| C  | 12.335414592814  | 24.759583860176 | -3.030956776399 |
| C  | 12.124104719043  | 26.095384338351 | -2.750210289729 |
| C  | 13.049468472556  | 27.163785497335 | -2.836020140104 |
| C  | 12.783239886459  | 28.528652346821 | -2.545298871907 |
| H  | 11.836361080522  | 28.937078210217 | -2.221459988225 |
| C  | 13.961997584321  | 29.214901117993 | -2.773645006995 |
| H  | 14.139416275090  | 30.274599170072 | -2.657156422848 |
| C  | 14.913961821207  | 28.249214733744 | -3.197847748313 |
| N  | 16.154286193806  | 23.493430326347 | -4.405614109463 |
| Cl | 13.772228340968  | 20.280735550824 | -4.120426753127 |
| Cl | 10.506708505190  | 26.544285549888 | -2.207658334316 |
| Cl | 16.770241226305  | 30.186680648979 | -3.421957942642 |
| Cl | 19.962625739857  | 23.964144429715 | -5.571011369449 |
| Ni | 15.256287581871  | 25.241123471428 | -3.818310095176 |

E = -4340.02204598 Hartrees
